# Supplementary material for: Synthesis of Chromium(II) Complexes with Chelating Bis(alkoxide) Ligand and Their Reactions with Organoazides and Diazoalkanes
Source: PubMed Central journal article supplement (PMC7024303; doi:10.3390/molecules25020273), 2020-01-09
Supplement: molecules-25-00273-s001.pdf [file molecules-25-00273-s001.pdf]

**Supporting Information for:**

**Synthesis of Chromium(II) Complexes with Chelating Bis(alkoxide) Ligand  
and Their Reactions with Organoazides and Diazoalkanes**

Sudheer S. Kurup<sup>1</sup>, Richard J. Staples<sup>2</sup>, Richard L. Lord<sup>3,\*</sup> and Stanislav Groysman<sup>1,\*</sup>

## Table of Contents

|                                              |    |
|----------------------------------------------|----|
| 1. NMR Spectra                               | 2  |
| 2. UV-vis Spectra                            | 41 |
| 3. High Resolution Mass Spectrum of <b>7</b> | 57 |
| 4. GC-MS Spectra                             | 58 |
| 5. IR Spectra                                | 56 |
| 6. Computational data                        | 58 |

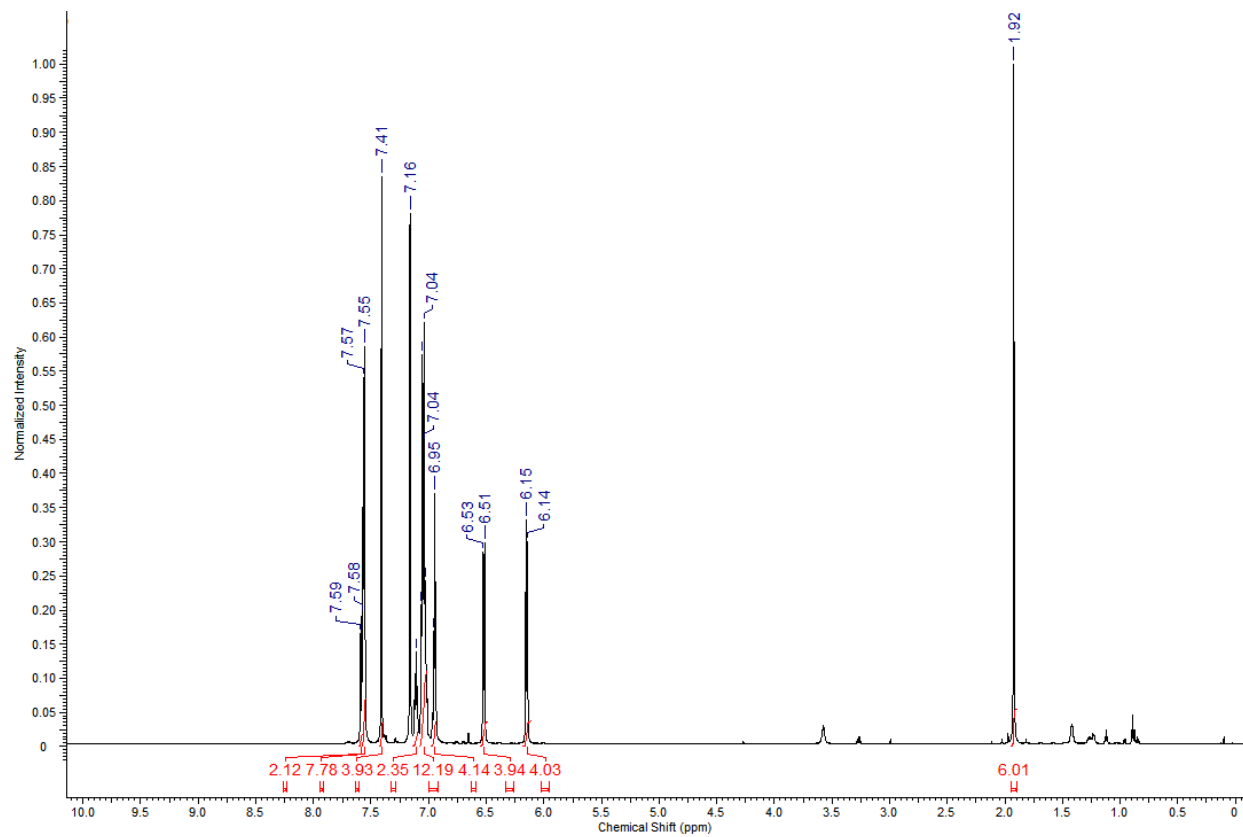

**Figure S1.**  $^1\text{H}$  NMR of  $\text{Cr}[\text{OO}]^{\text{Ph}}(\text{N}(4\text{-CH}_3\text{Ph}))_2$  (3).

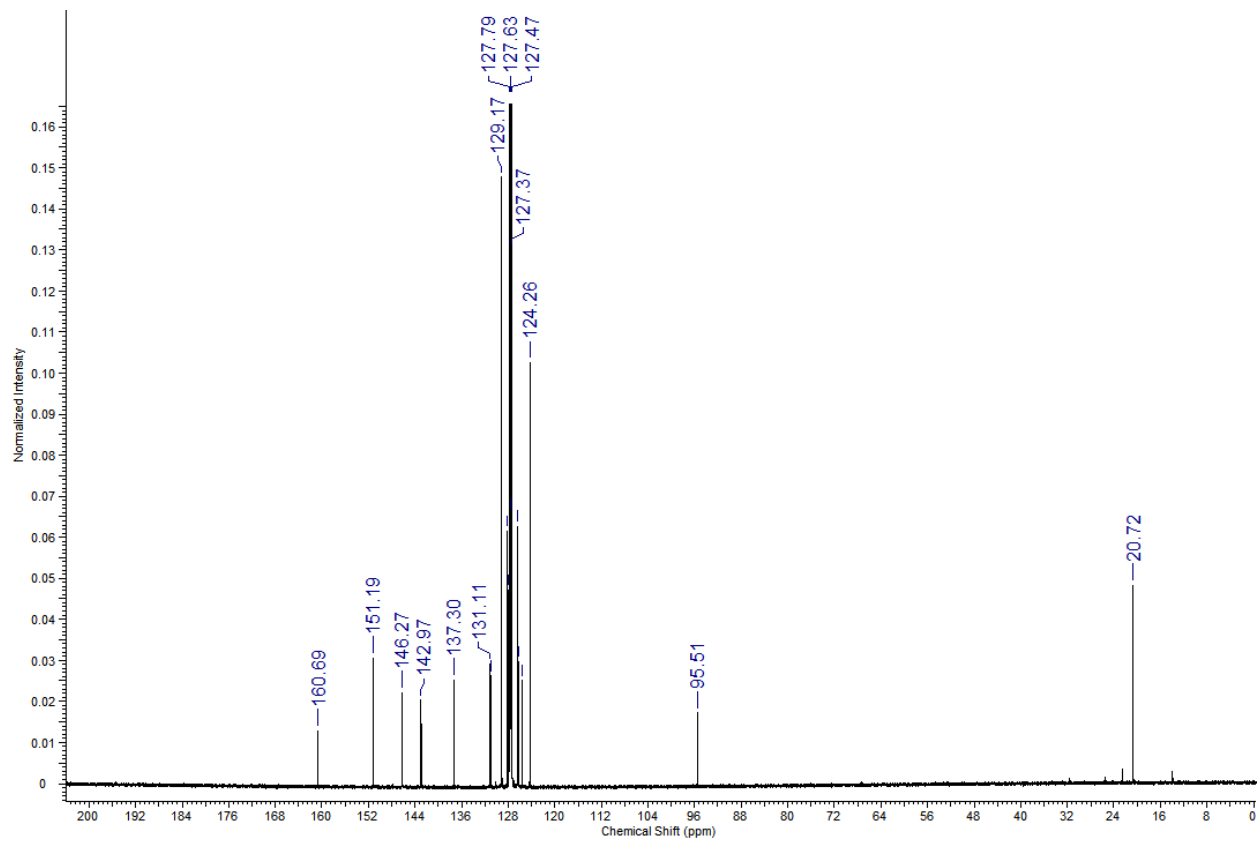

**Figure S2.**  $^{13}\text{C}$  NMR  $\text{Cr}[\text{OO}]^{\text{Ph}}(\text{N}(4\text{-CH}_3\text{Ph}))_2$  (**3**).

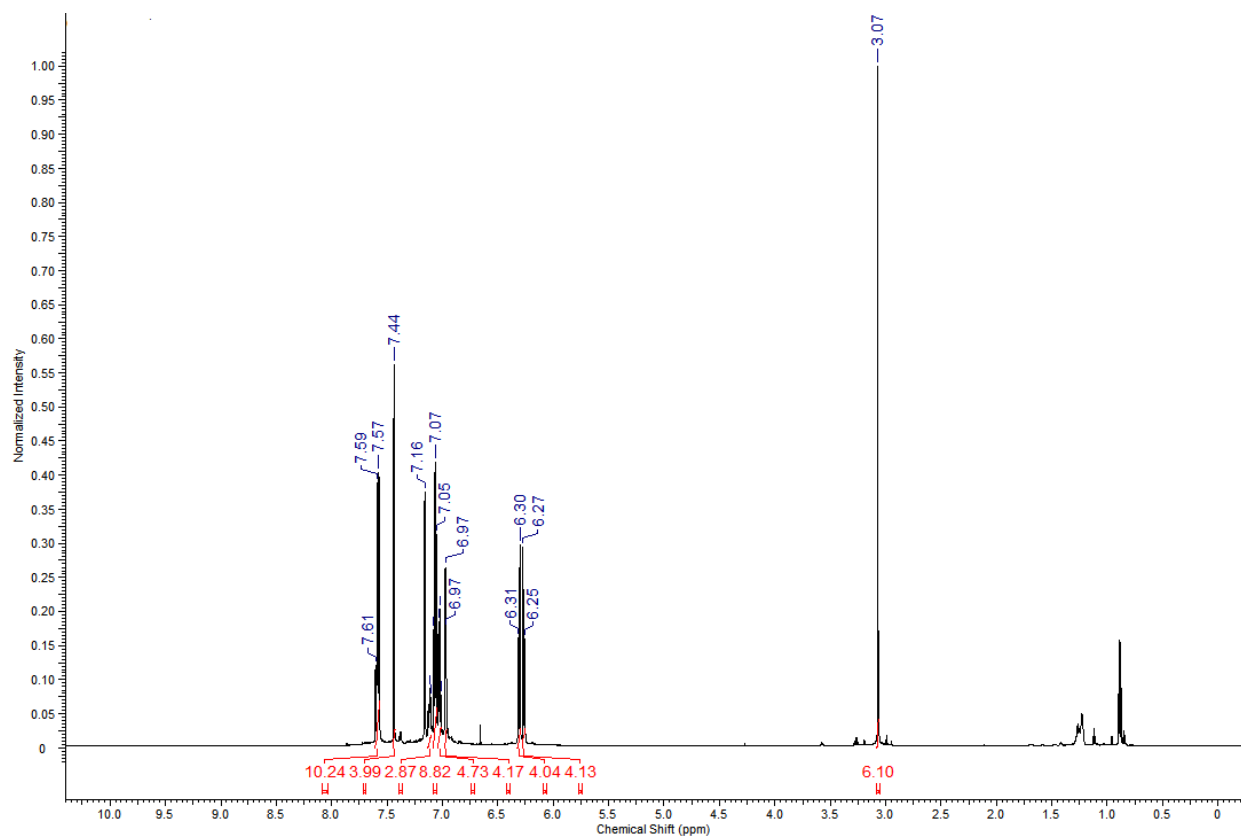

**Figure S3.**  $^1\text{H}$  NMR of  $\text{Cr}[\text{OO}]^{\text{Ph}}(\text{N}(4\text{-CH}_3\text{OPh}))_2$  (**4**).

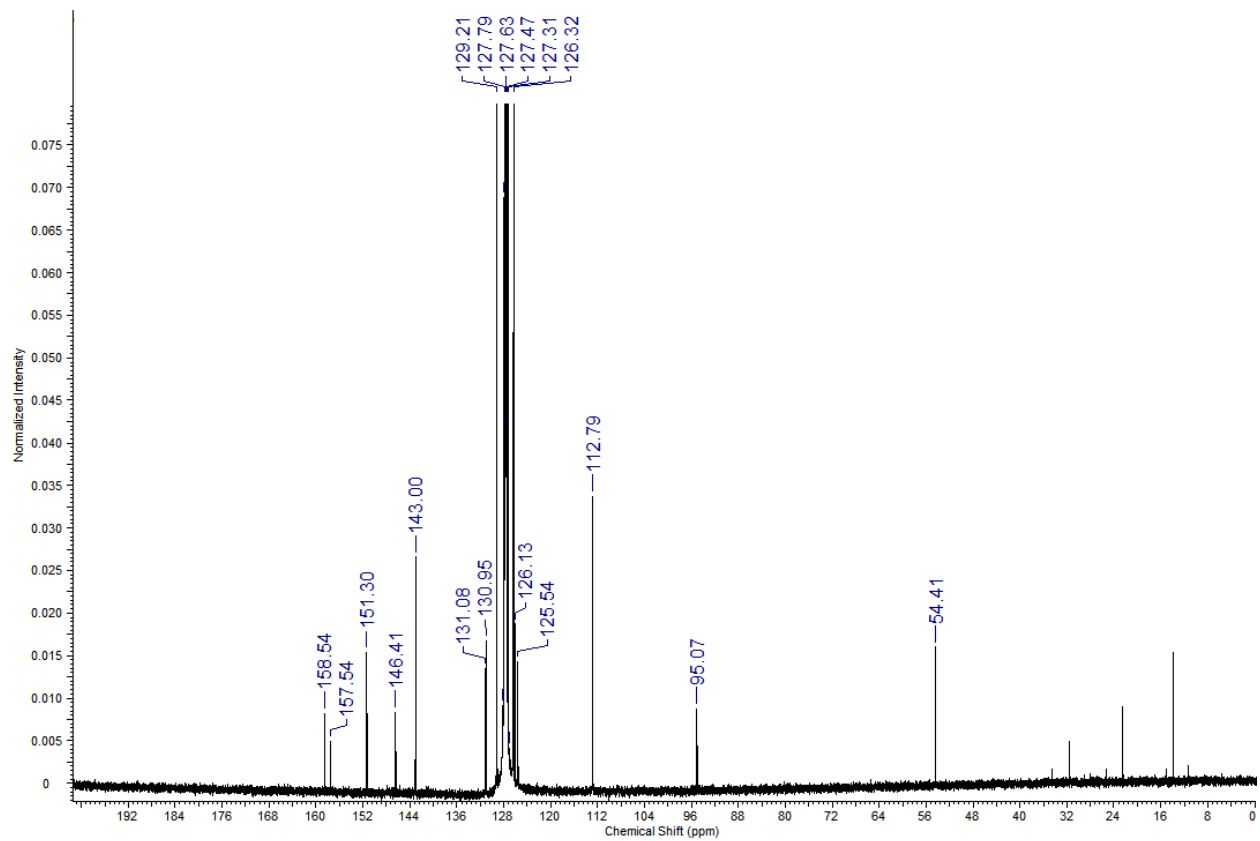

**Figure S4.**  $^{13}\text{C}$  NMR of  $\text{Cr}[\text{OO}]^{\text{Ph}}(\text{N}(4\text{-CH}_3\text{OPh}))_2$  (4).

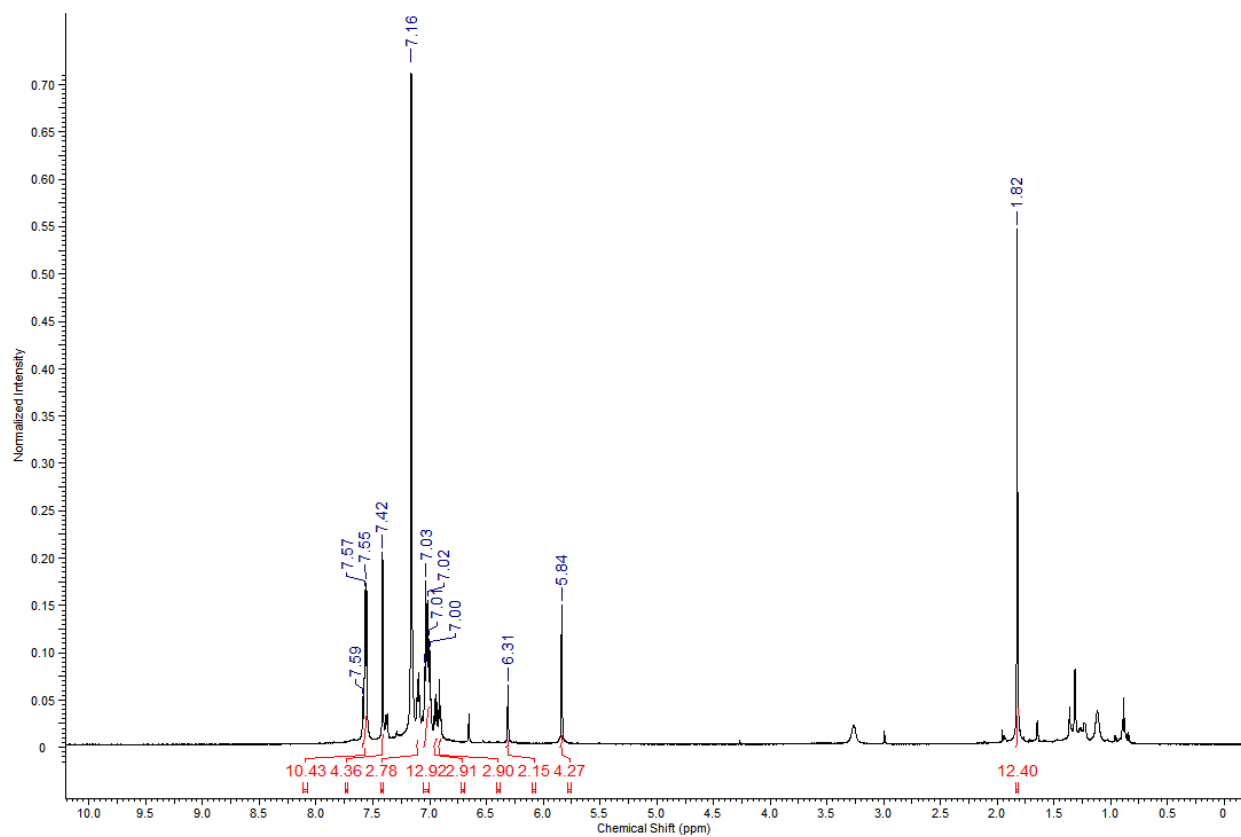

**Figure S5.**  $^1\text{H}$  NMR of  $\text{Cr}[\text{OO}]^{\text{Ph}}(\text{N}(3,5\text{-}(\text{CH}_3)_2\text{Ph}))_2$  (5).

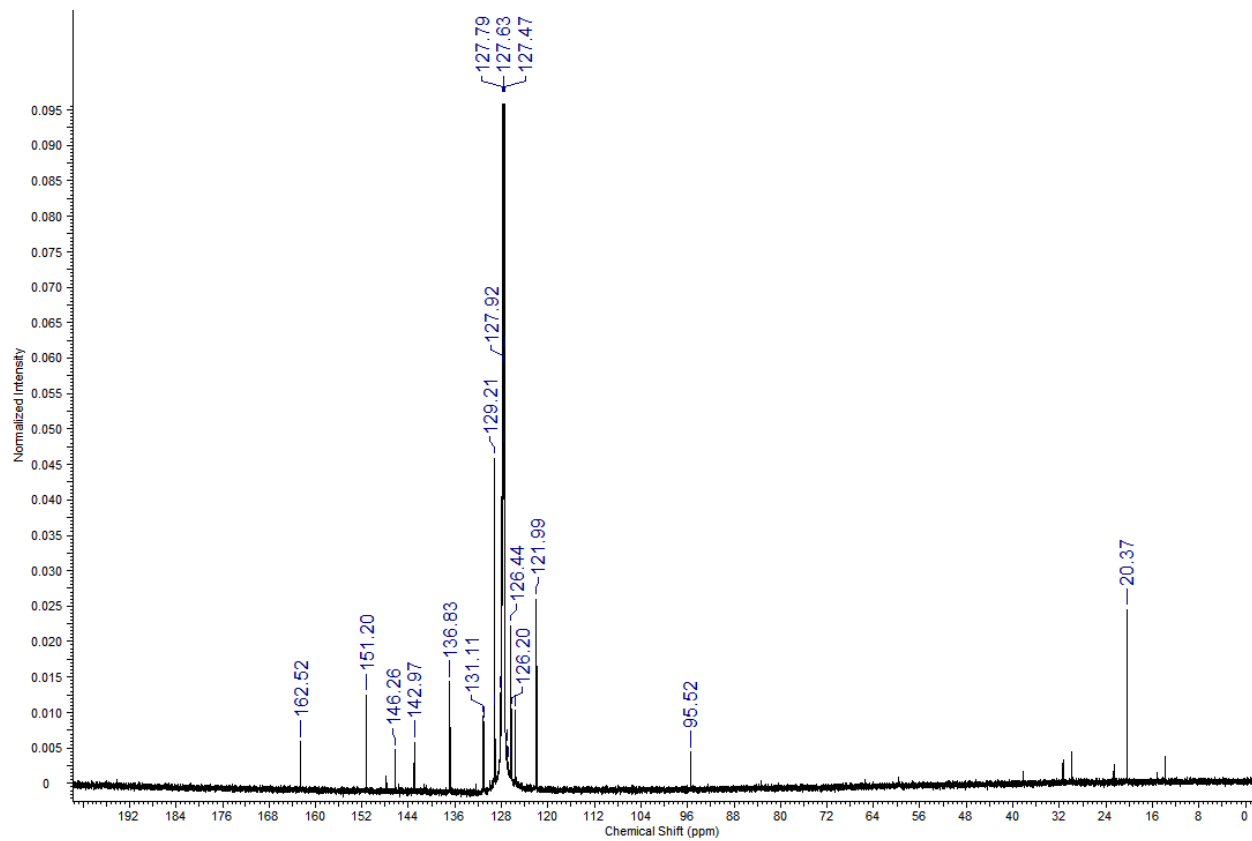

**Figure S6.**  $^{13}\text{C}$  NMR of  $\text{Cr}[\text{OO}]^{\text{Ph}}(\text{N}(3,5\text{-}(\text{CH}_3)_2\text{Ph}))_2$  (**5**).



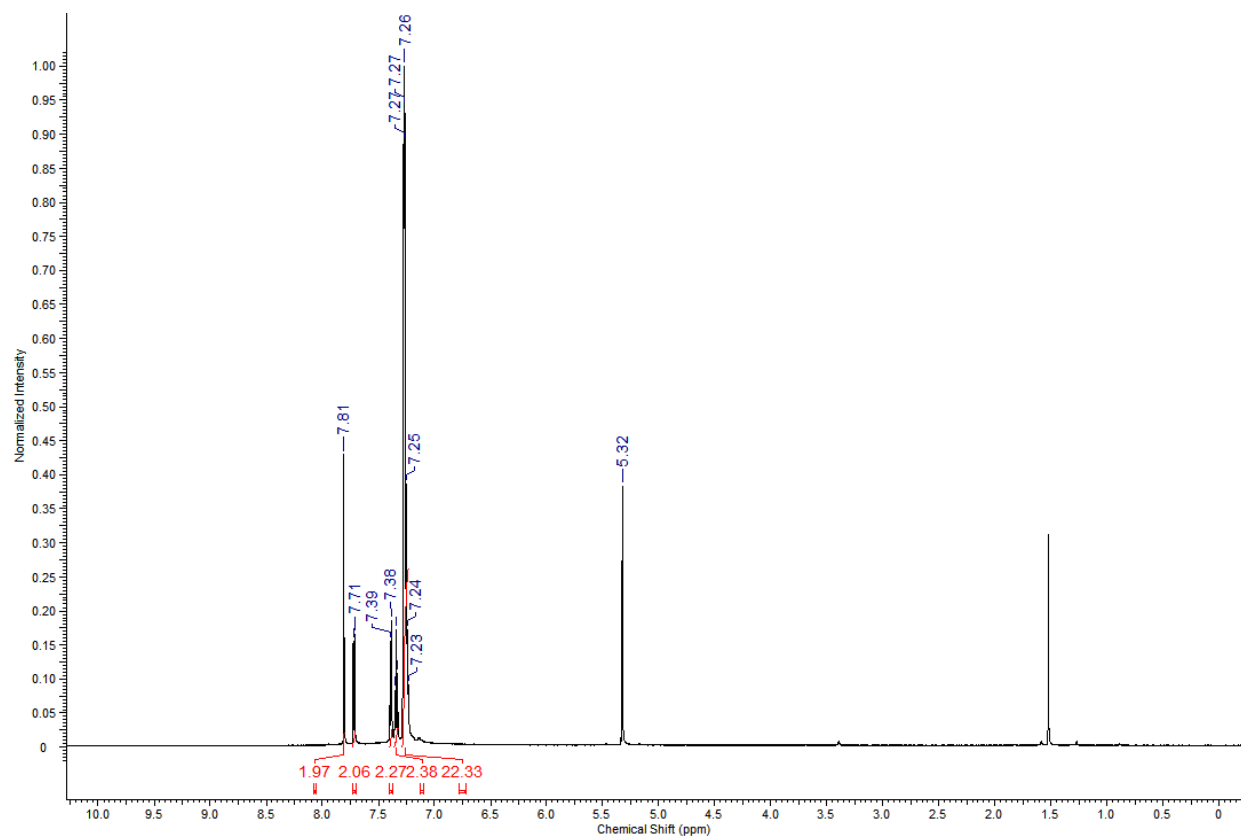

**Figure S7.**  $^1\text{H}$  NMR of 6,6,12,12-tetraphenyl-6,12-dihydroindeno[1,2-b]fluorine (7).

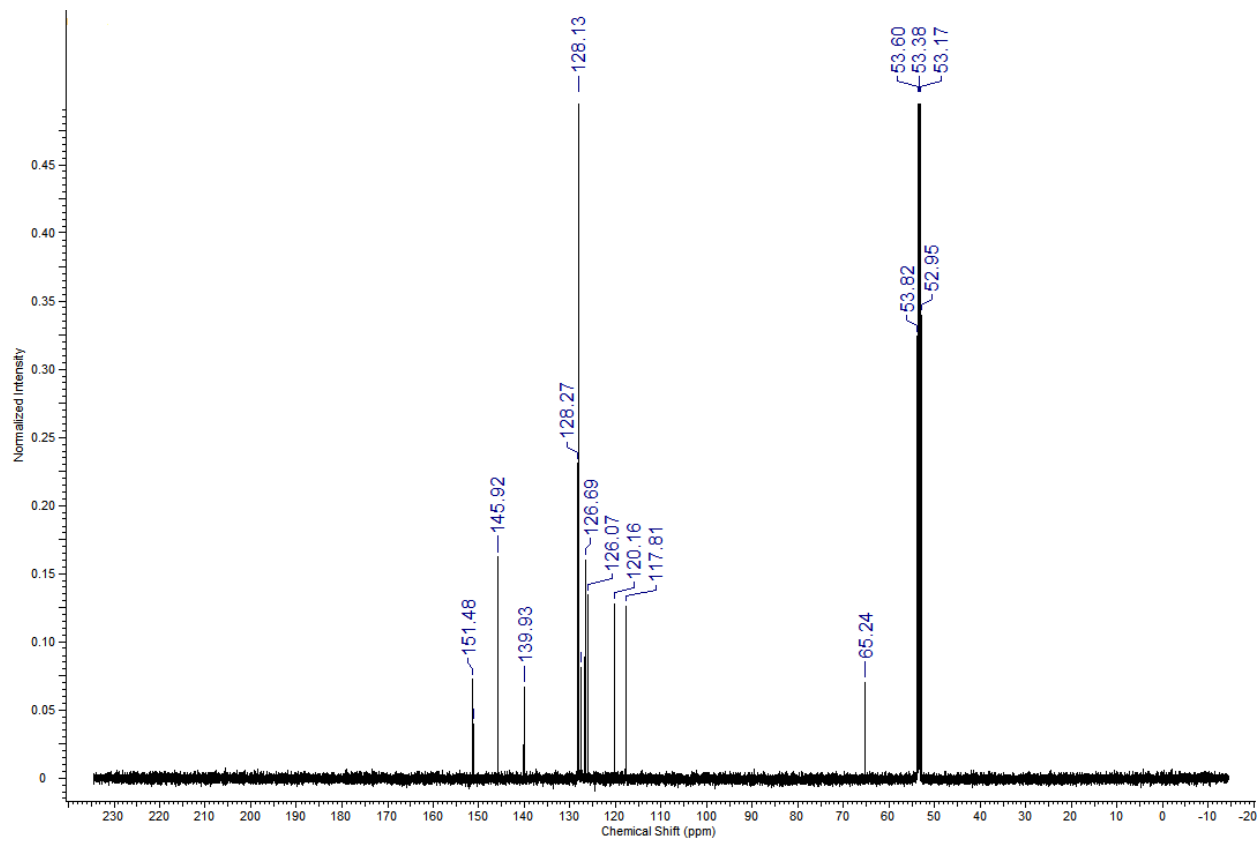

Figure S8.  $^{13}\text{C}$  NMR of 6,6,12,12-tetraphenyl-6,12-dihydroindeno[1,2-b]fluorene (**7**).

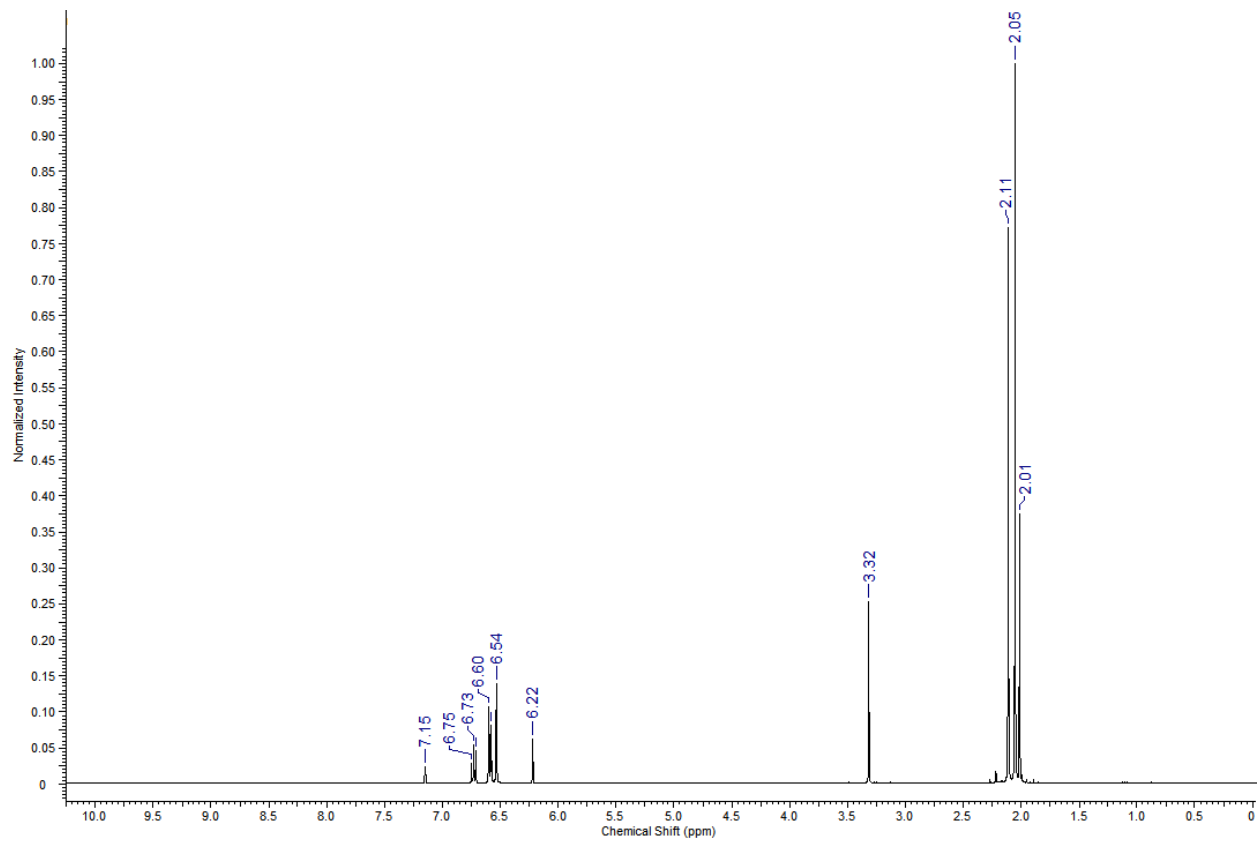

**Figure S9.** <sup>1</sup>H NMR of mesityl azide and xylol isocyanide prior to the addition of the catalyst (the resonances at 3.32 and 6.22 ppm belong to the internal standard TMB).

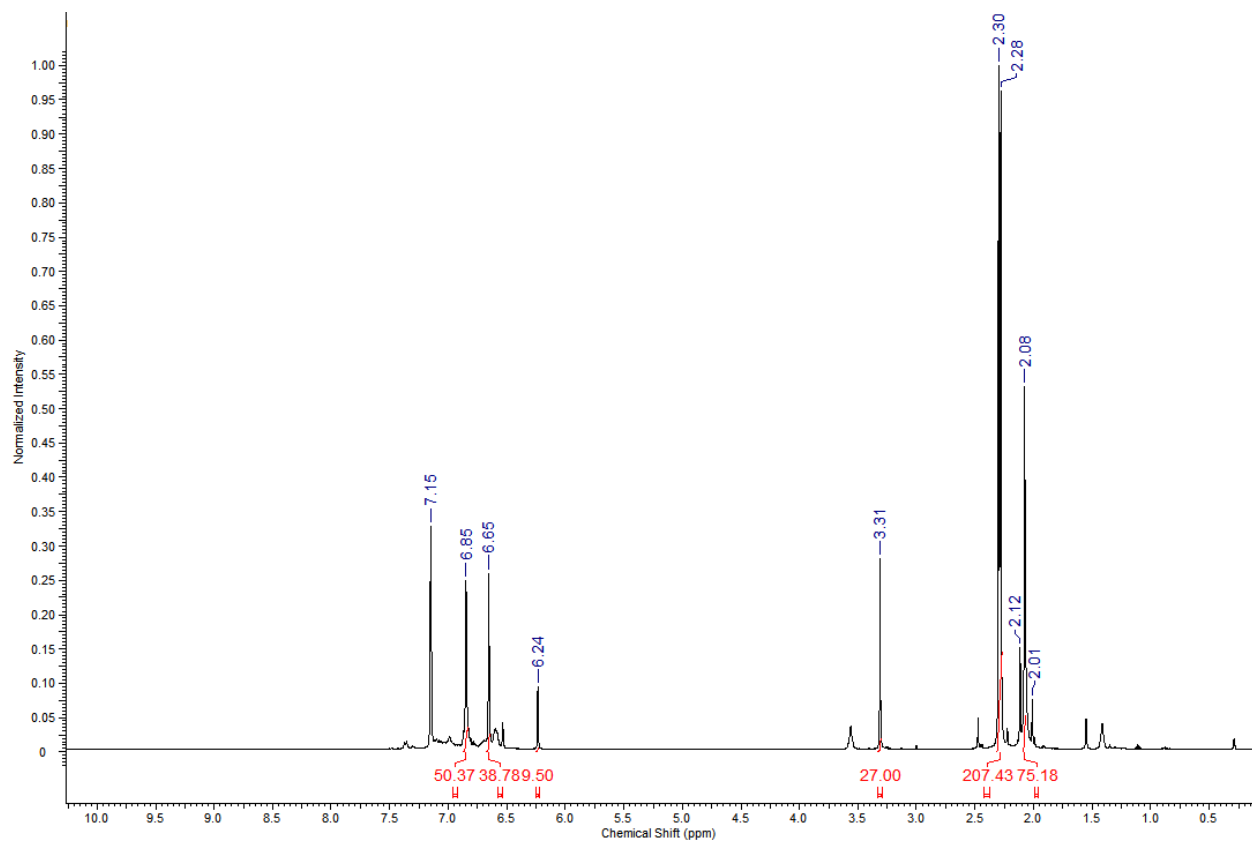

**Figure S10.** <sup>1</sup>H NMR of the catalytic reaction between mesityl azide, xyllyl isocyanide, and **2**, demonstrating formation of respective carbodiimide.

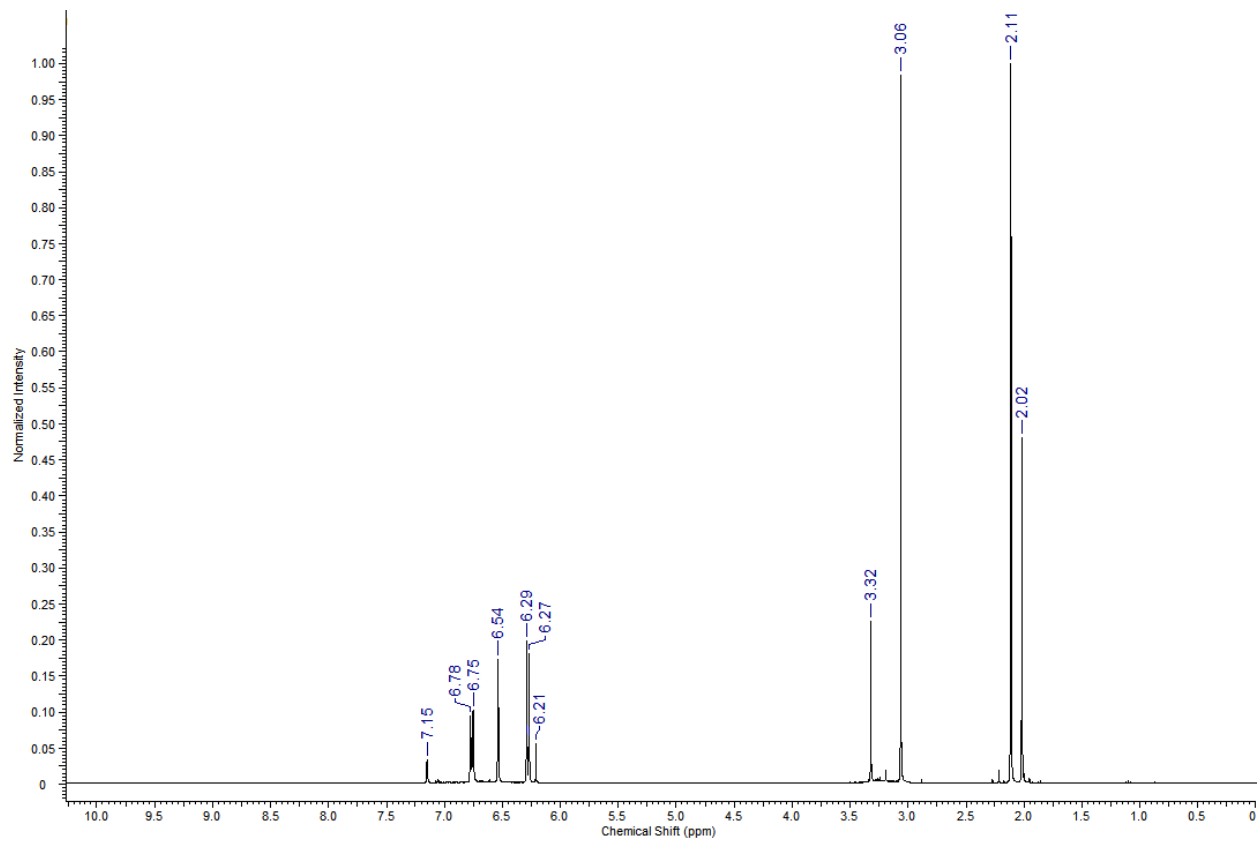

**Figure S11.**  $^1\text{H}$  NMR of mesityl azide and 4-methoxyphenyl isocyanide prior to the addition of the catalyst (the resonances at 3.32 and 6.21 belong to the internal standard TMB).

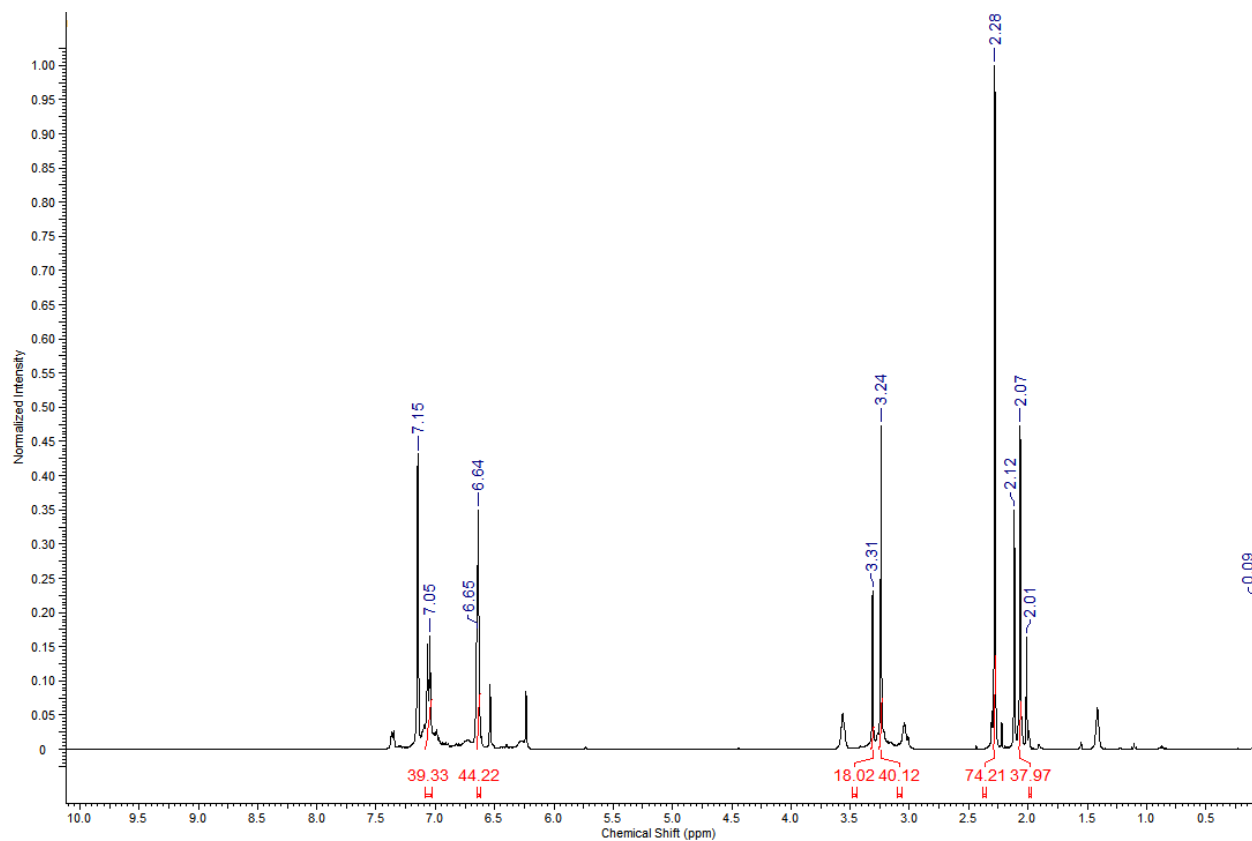

**Figure S12.** <sup>1</sup>H NMR of the catalytic reaction between mesityl azide, 4-methoxyphenyl isocyanide, and **2**, demonstrating formation of respective carbodiimide (see experimental for the reaction conditions).

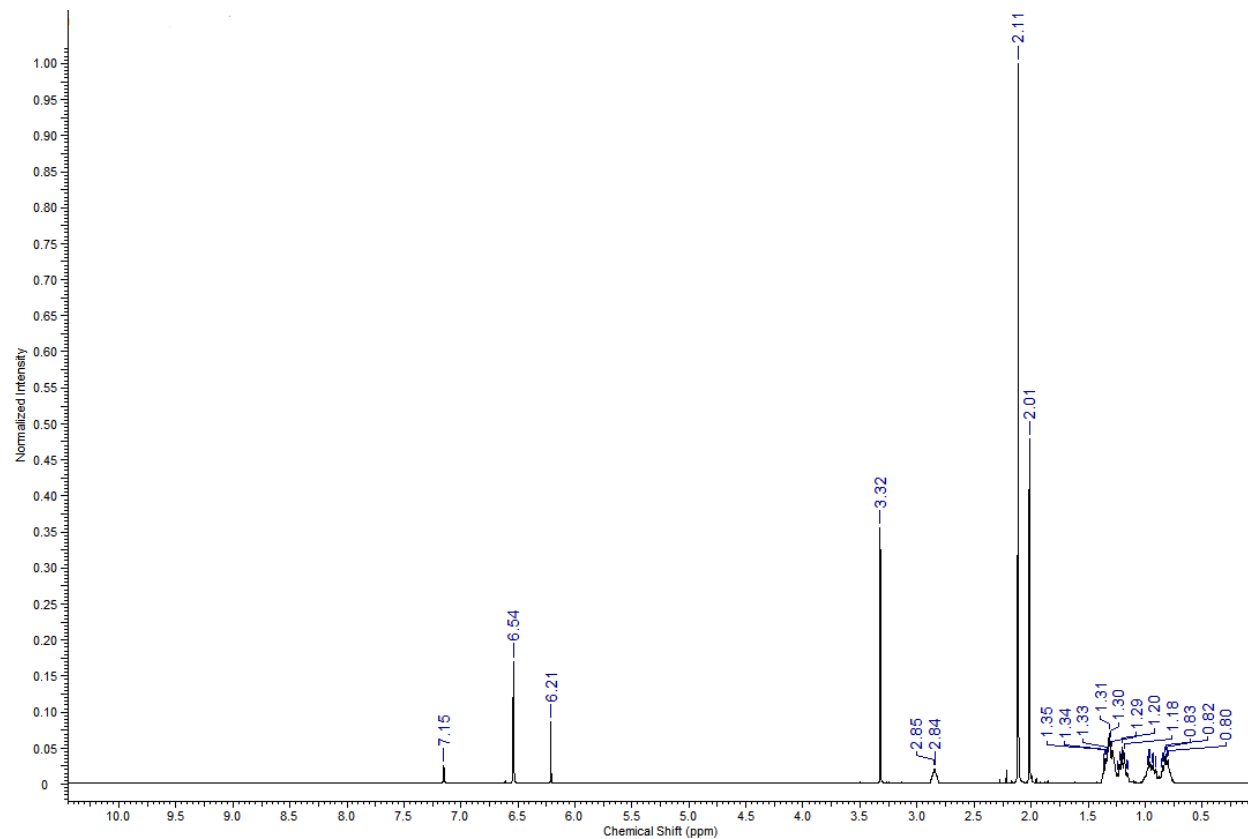

**Figure S13.**  $^1\text{H}$  NMR of mesityl azide and cyclohexyl isocyanide prior to the addition of the catalyst (the resonances at 3.32 and 6.21 belong to the internal standard TMB).

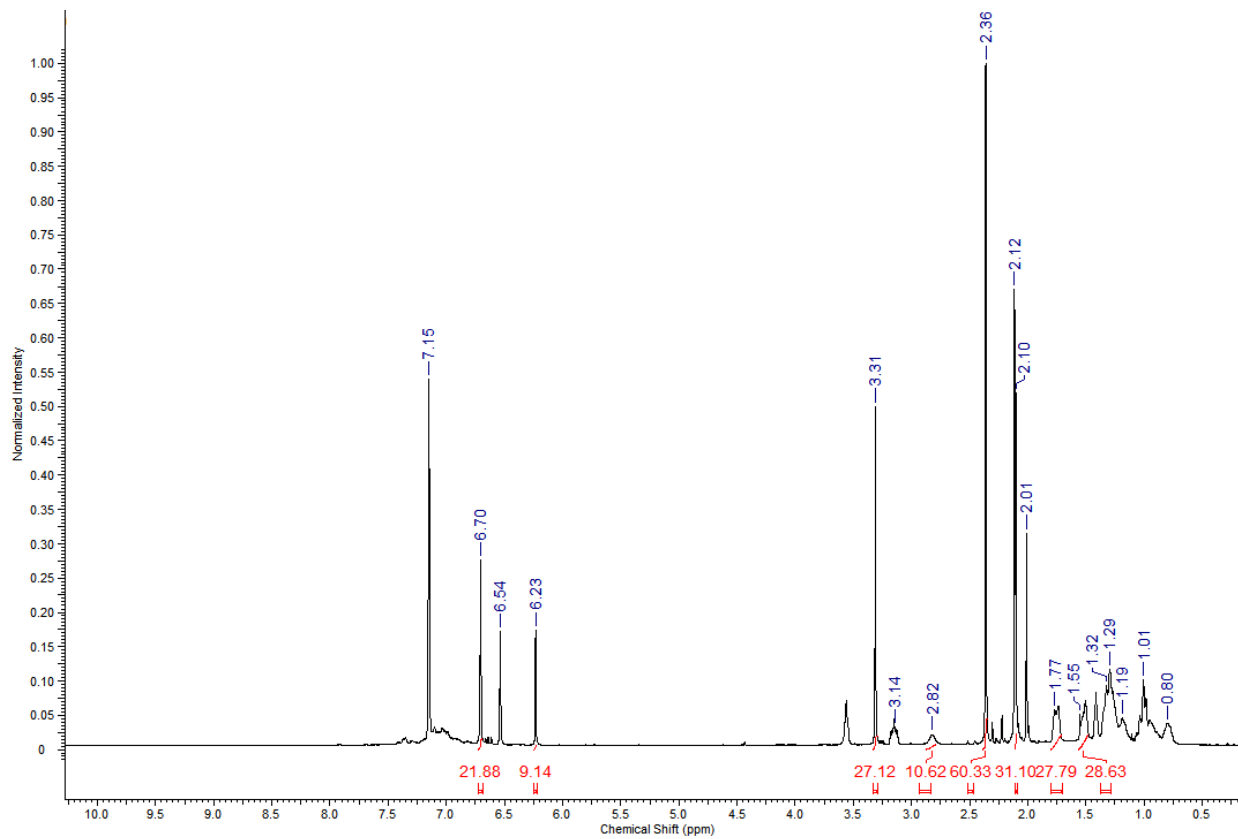

**Figure S14.**  $^1\text{H}$  NMR of the reaction between mesityl azide, cyclohexyl isocyanide, and **2**, demonstrating formation of respective carbodiimide.



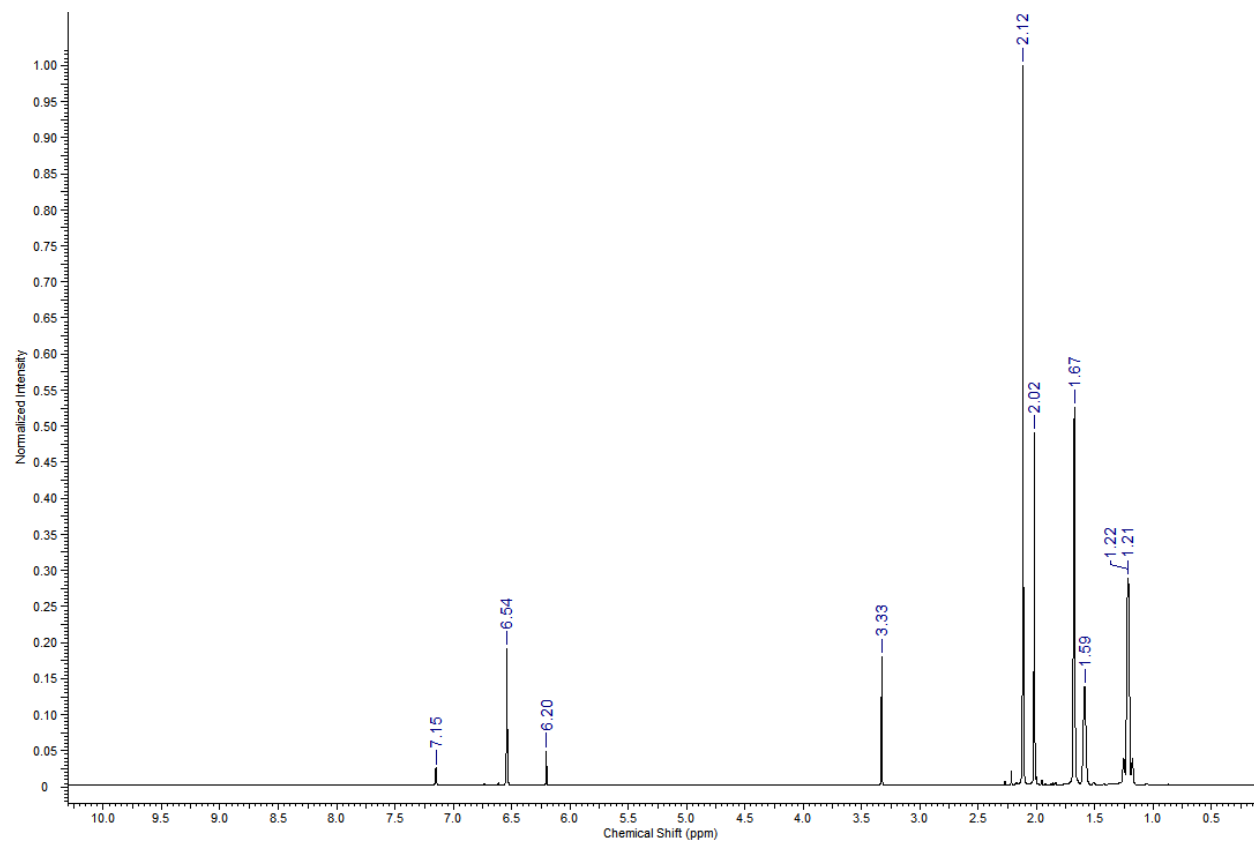

**Figure S15.** <sup>1</sup>H NMR of mesityl azide and 1-adamantyl isocyanide prior to the addition of the catalyst (the resonances at 3.33 and 6.20 belong to the internal standard TMB).

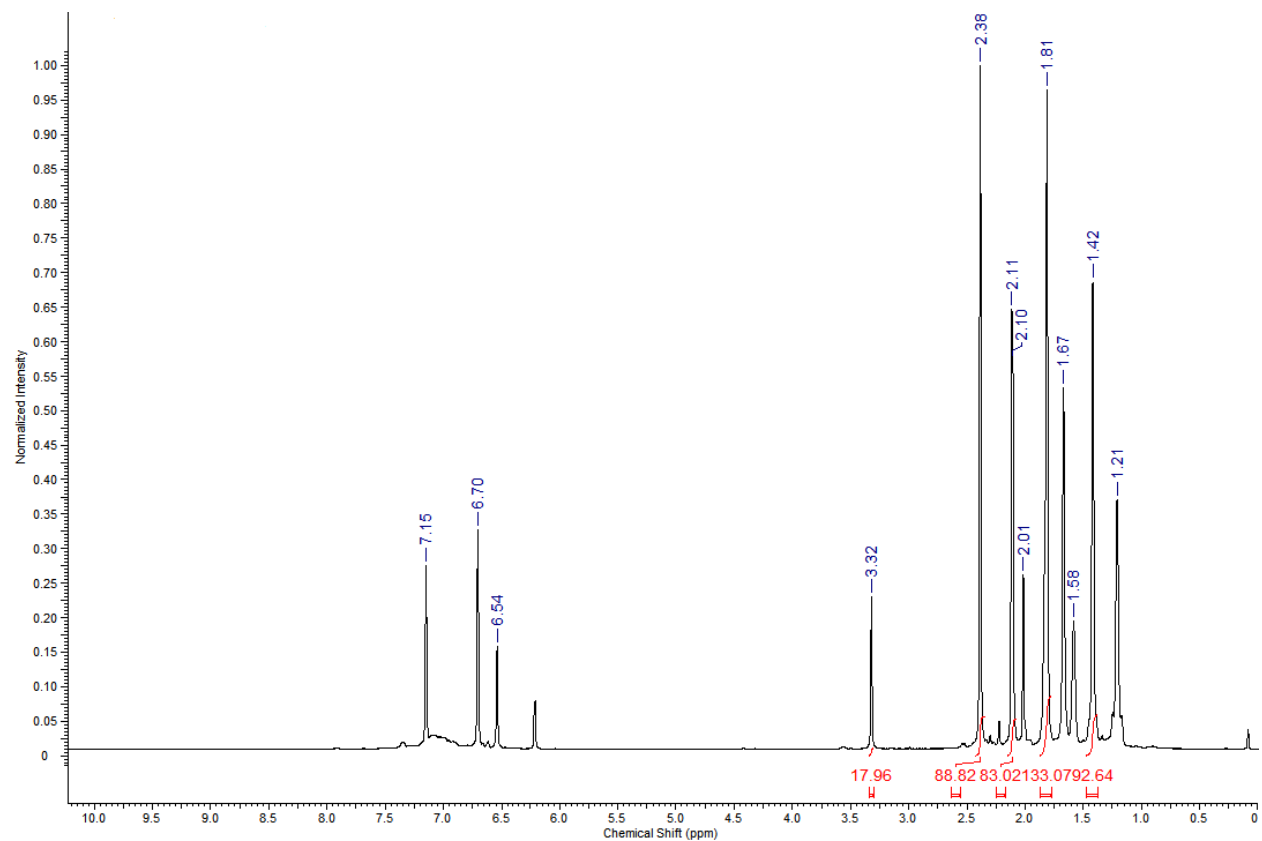

**Figure S16.** <sup>1</sup>H NMR of the reaction between mesityl azide, 1-adamantyl isocyanide, and **2**, showing formation of respective carbodiimide (carbodiimide peak at 2.10 ppm overlaps with unreacted mesityl azide peak at 2.11 ppm).

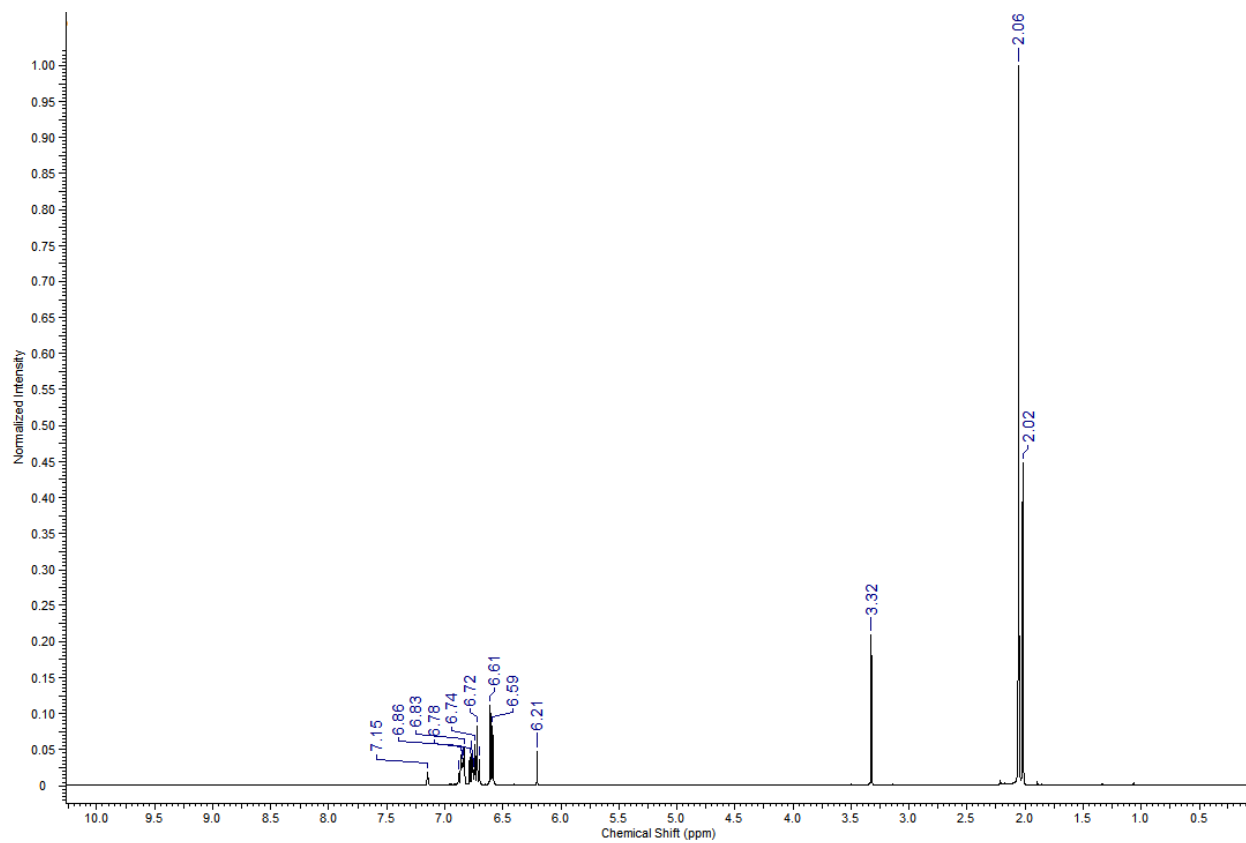

**Figure S17.** <sup>1</sup>H NMR of o-tolyl azide and xylyl isocyanide prior to the addition of the catalyst (the resonances at 3.32 and 6.21 belong to the internal standard TMB).

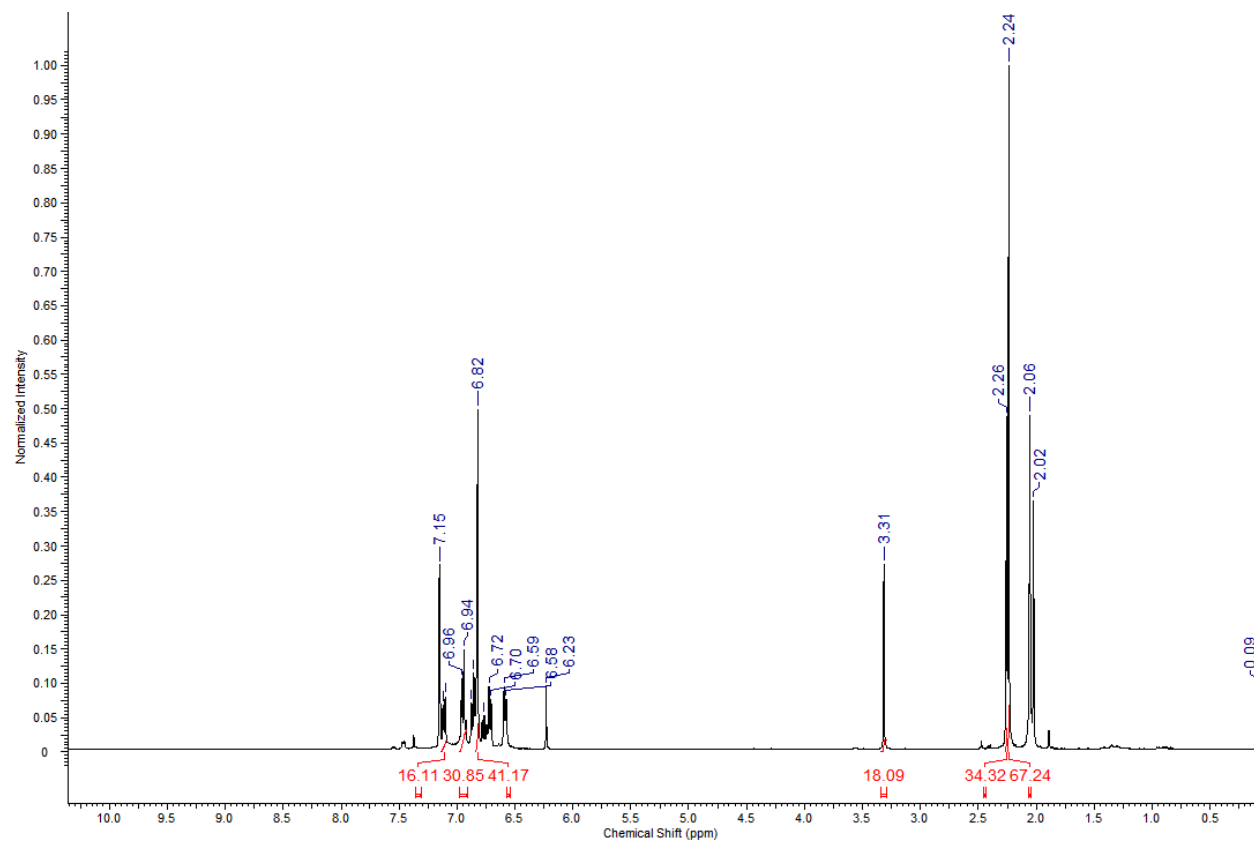

**Figure S18.** <sup>1</sup>H NMR of the reaction between o-tolyl azide, xyllyl isocyanide, and **2**, showing formation of respective carbodiimide.

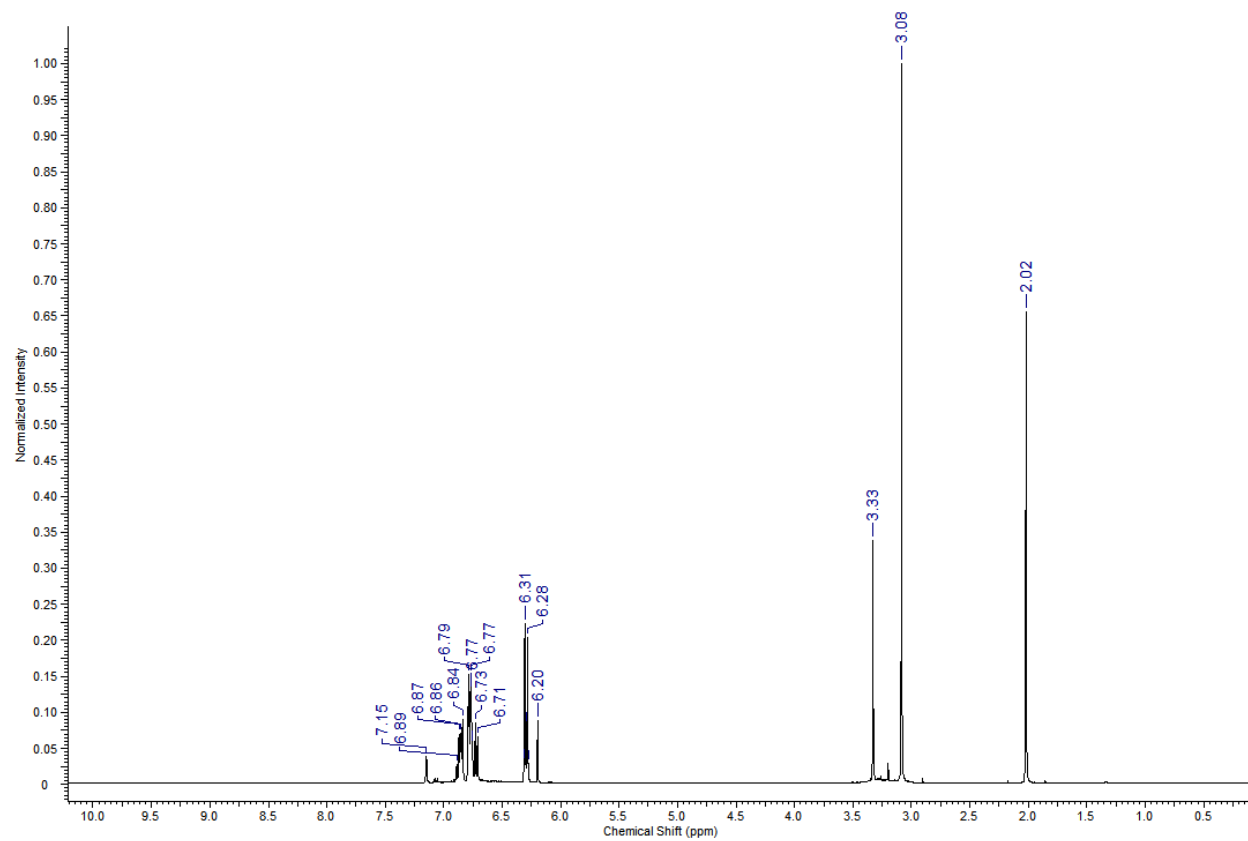

**Figure S19.** <sup>1</sup>H NMR of o-tolyl azide and 4-methoxyphenyl isocyanide prior to the addition of the catalyst (the resonances at 3.33 and 6.20 belong to the internal standard TMB).

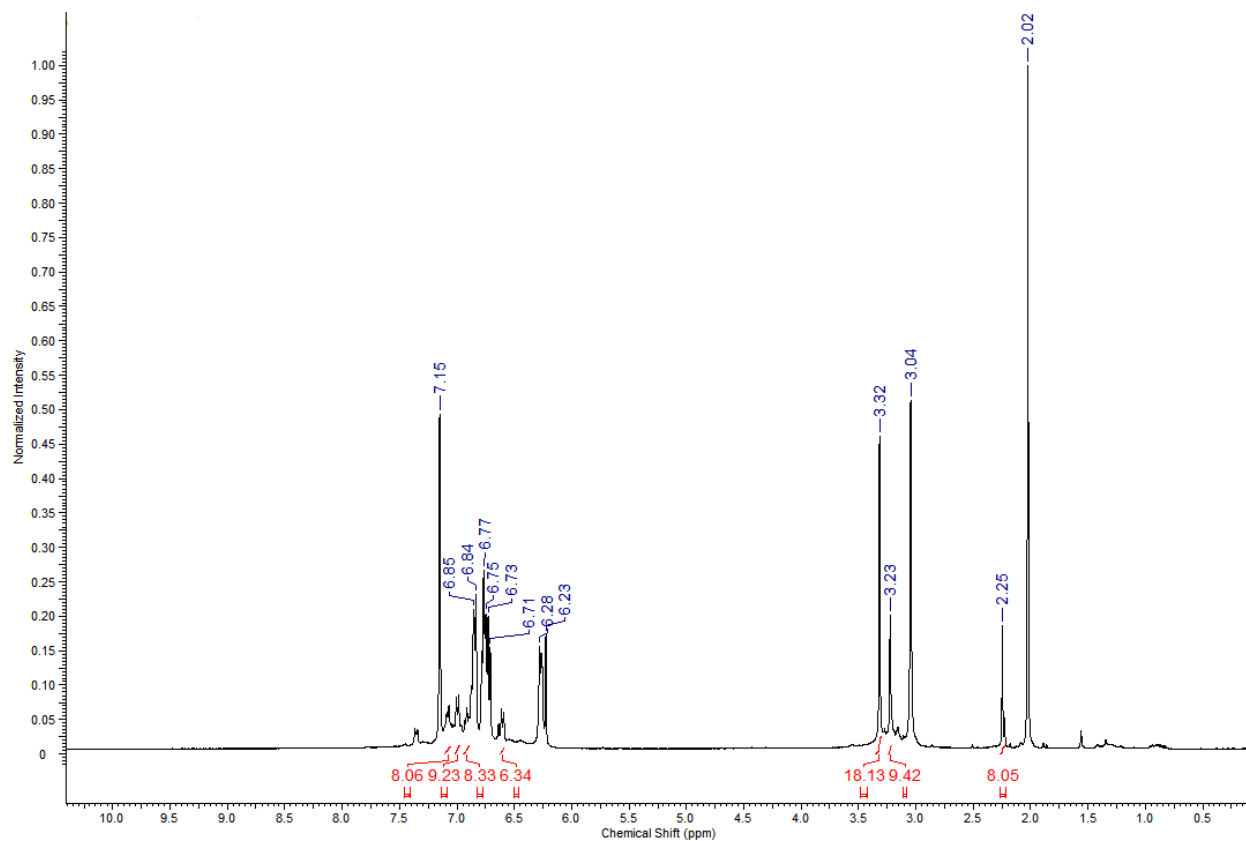

**Figure S20.** <sup>1</sup>H NMR of the reaction between o-tolyl azide, 4-methoxyphenyl isocyanide, and 2, demonstrating formation of respective carbodiimide.

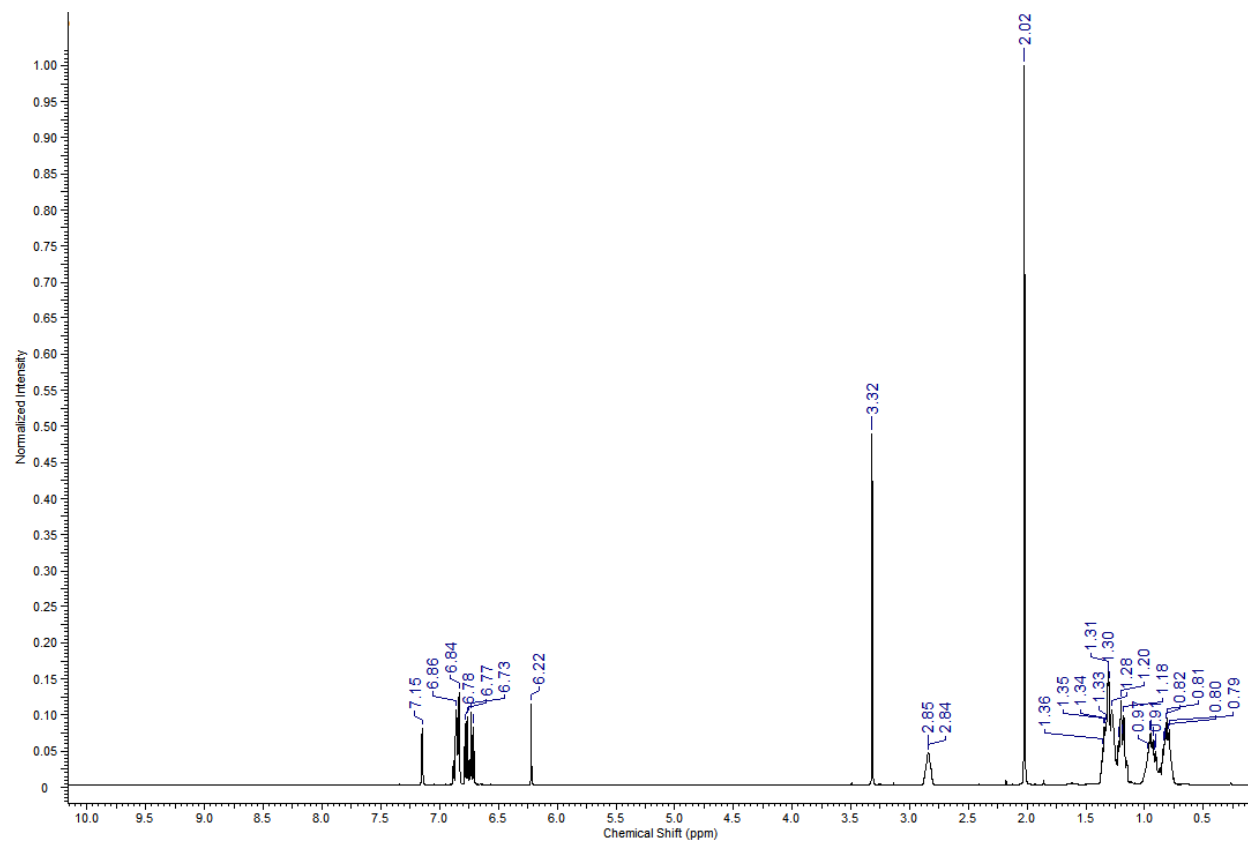

**Figure S21.** <sup>1</sup>H NMR of o-tolyl azide and cyclohexyl isocyanide prior to the addition of the catalyst (the resonances at 3.32 and 6.22 belong to the internal standard TMB).

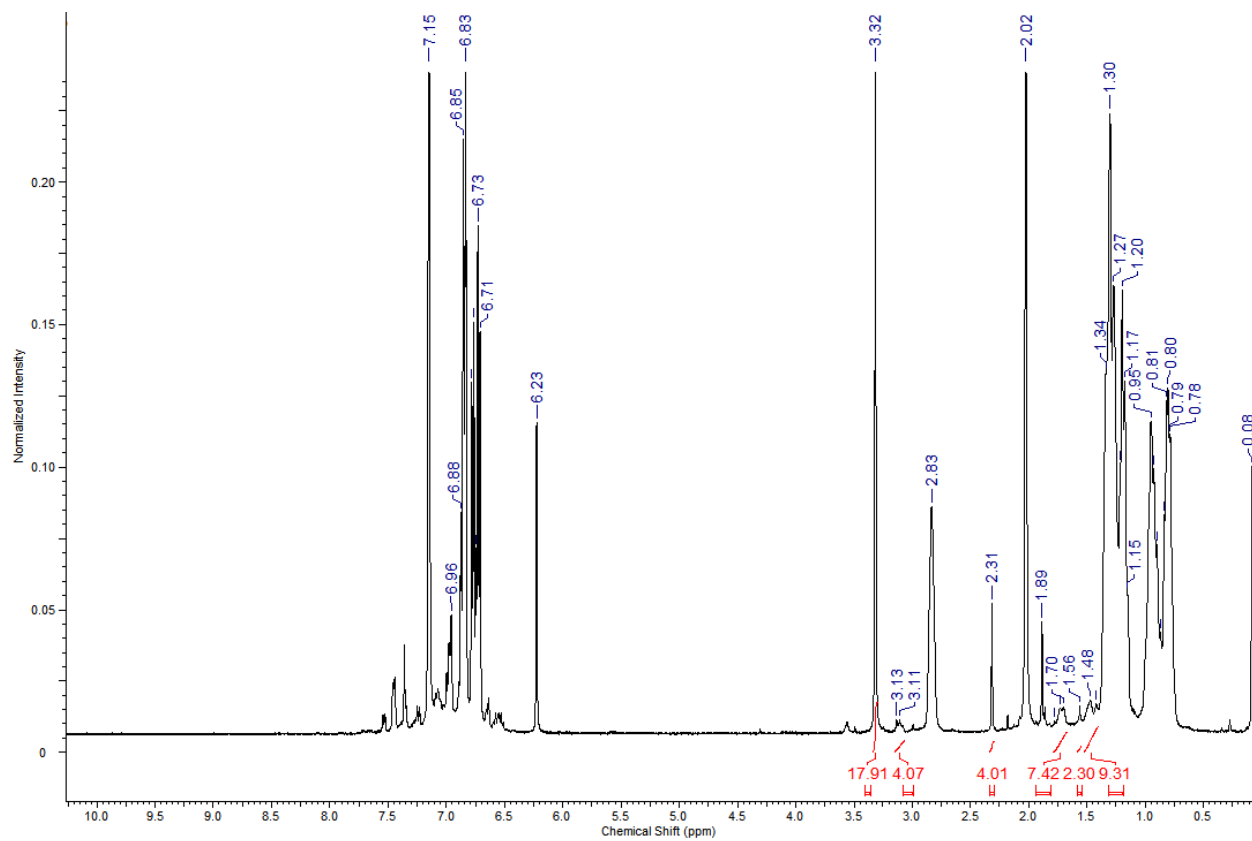

**Figure S22.** <sup>1</sup>H NMR of the reaction between o-tolyl azide, cyclohexyl isocyanide, and **2**, showing formation of respective carbodiimide.



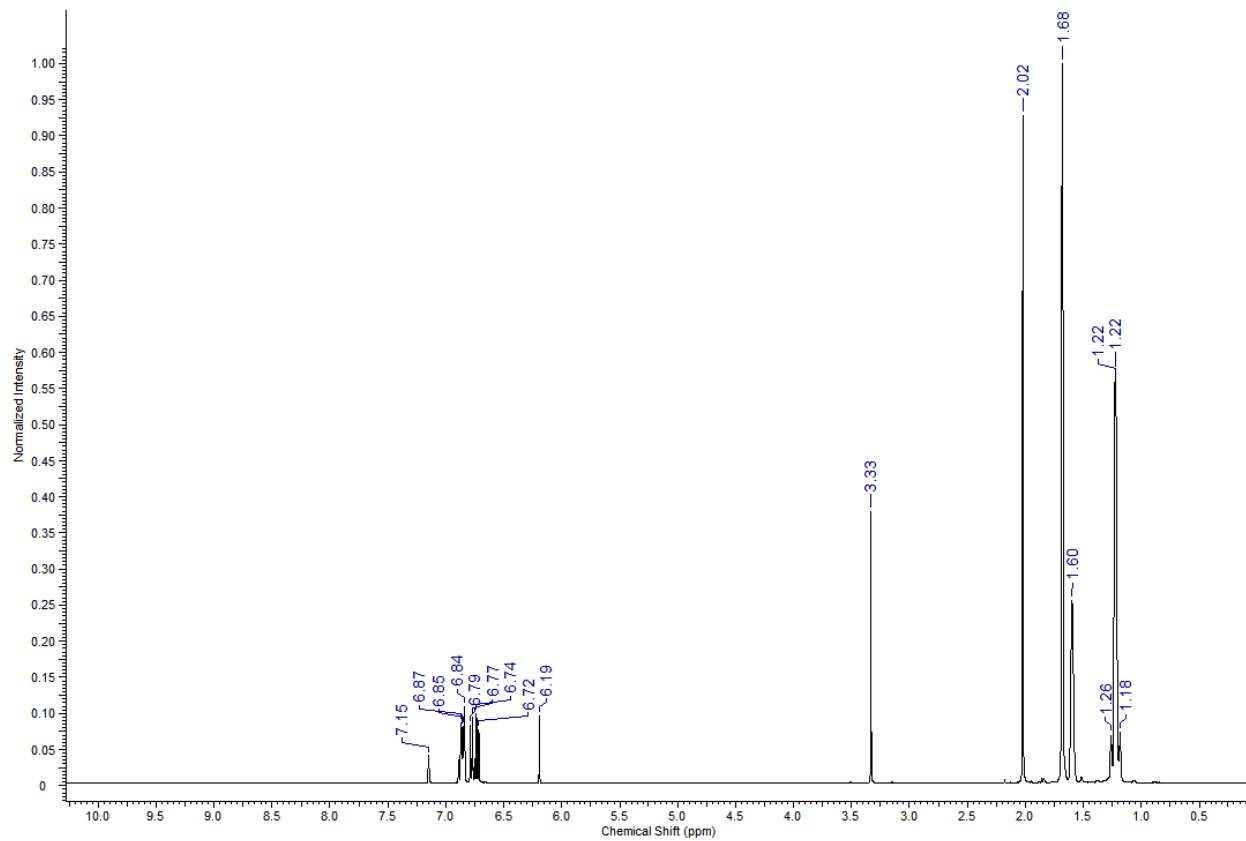

**Figure S23.** <sup>1</sup>H NMR of o-tolyl azide and adamantyl isocyanide prior to the addition of the catalyst (the resonances at 3.33 and 6.19 belong to the internal standard TMB).

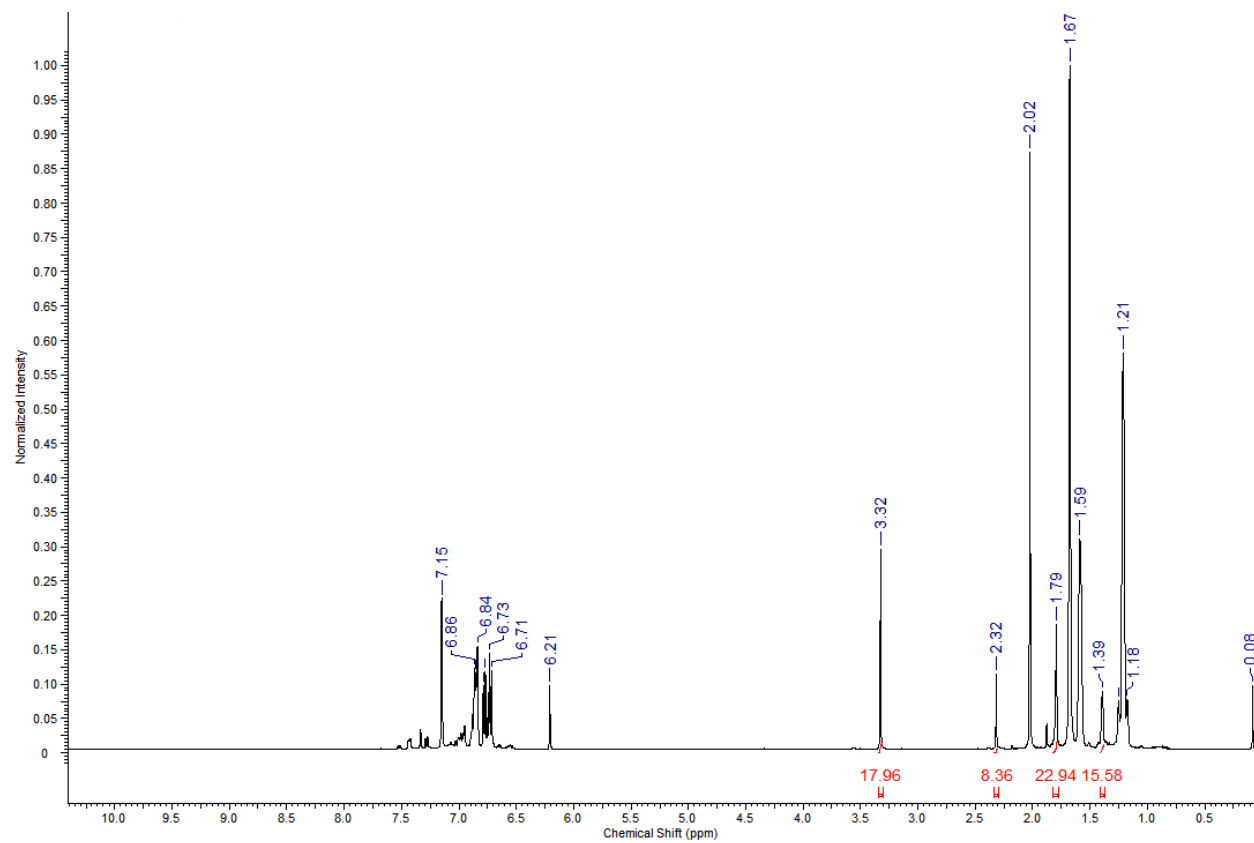

**Figure S24.** <sup>1</sup>H NMR of the reaction between o-tolyl azide, adamantyl isocyanide, and **2**, showing formation of respective carbodiimide.

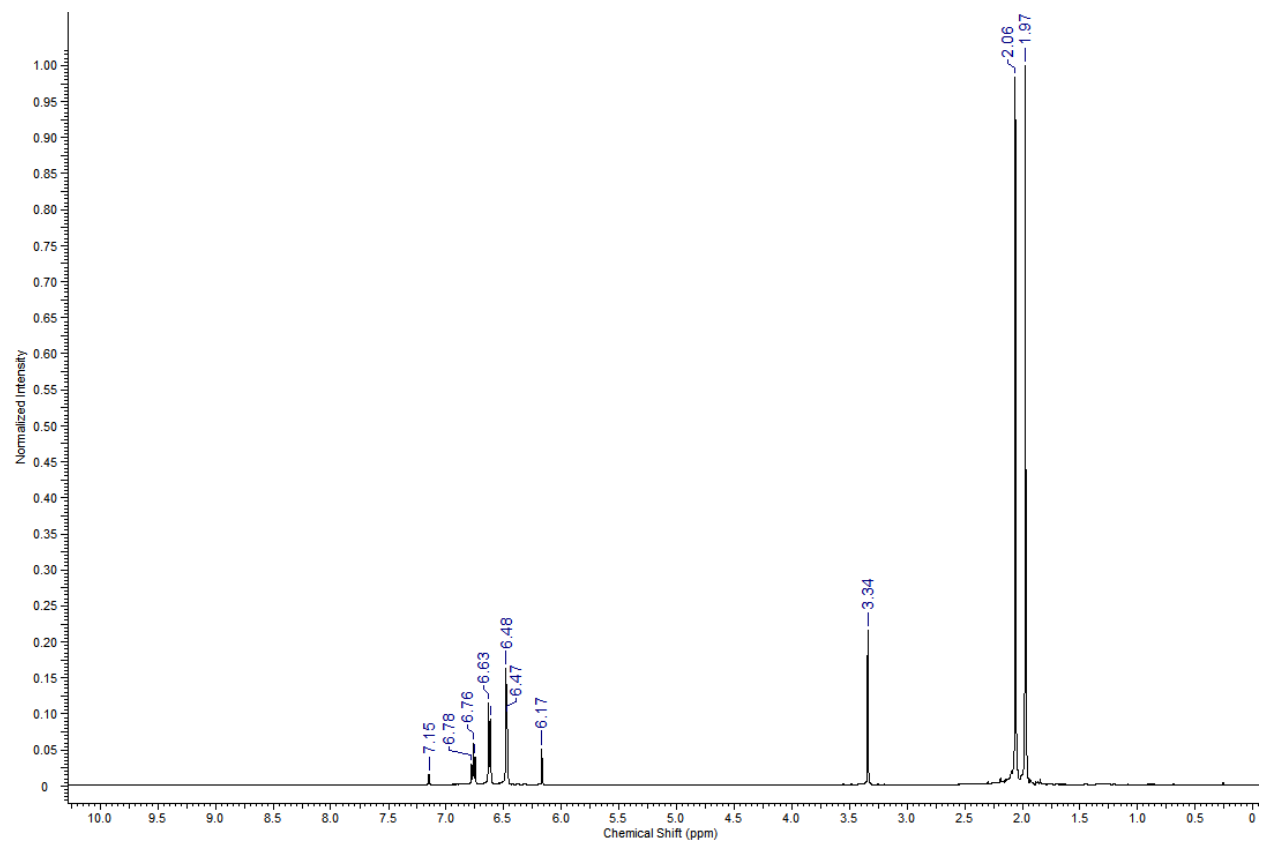

**Figure S25.** <sup>1</sup>H NMR of 3,5-dimethylphenyl azide and xylyl isocyanide prior to the addition of the catalyst (the resonances at 3.34 and 6.2217 belong to the internal standard TMB).

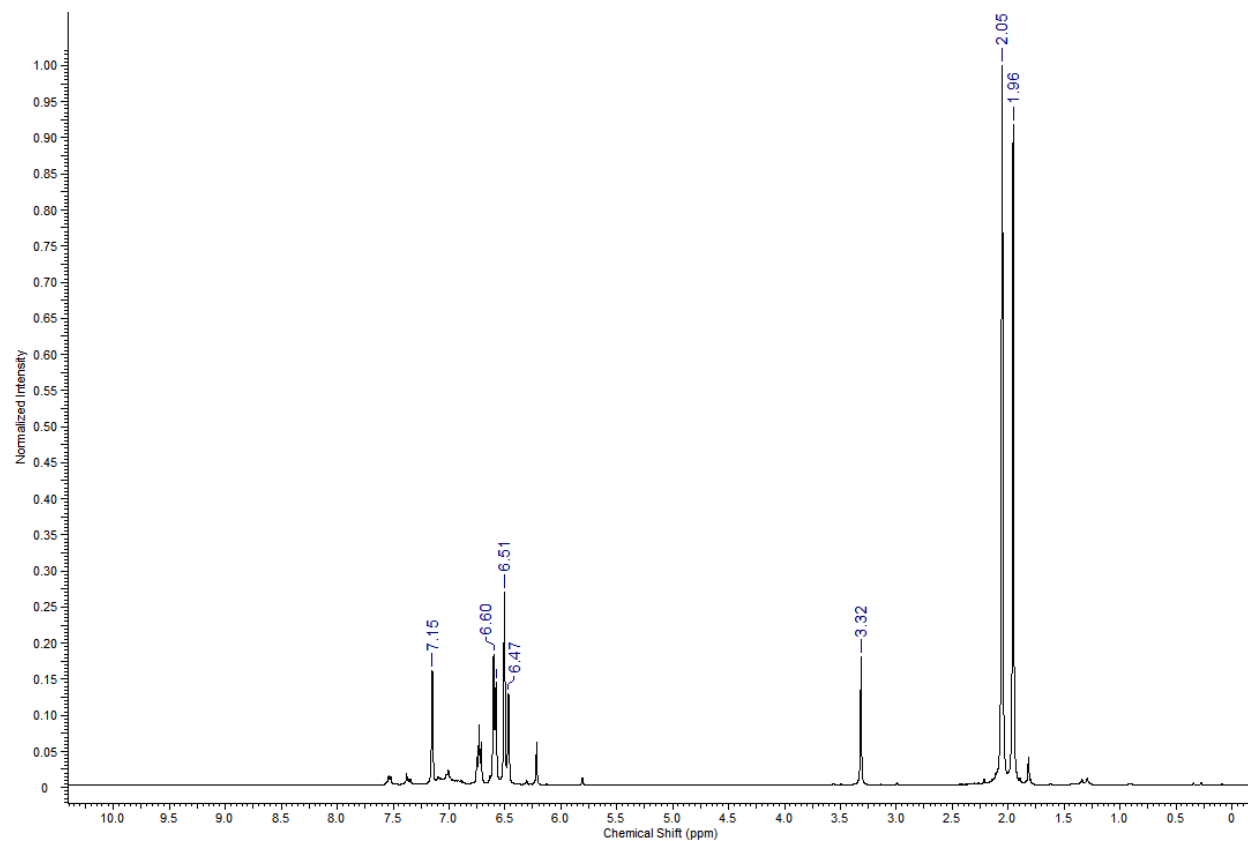

**Figure S26.** <sup>1</sup>H NMR of the reaction mixture of 3,5-dimethylphenyl azide, xylol isocyanide, and **2** (see experimental for the reaction conditions), showing no formation of respective carbodiimide.

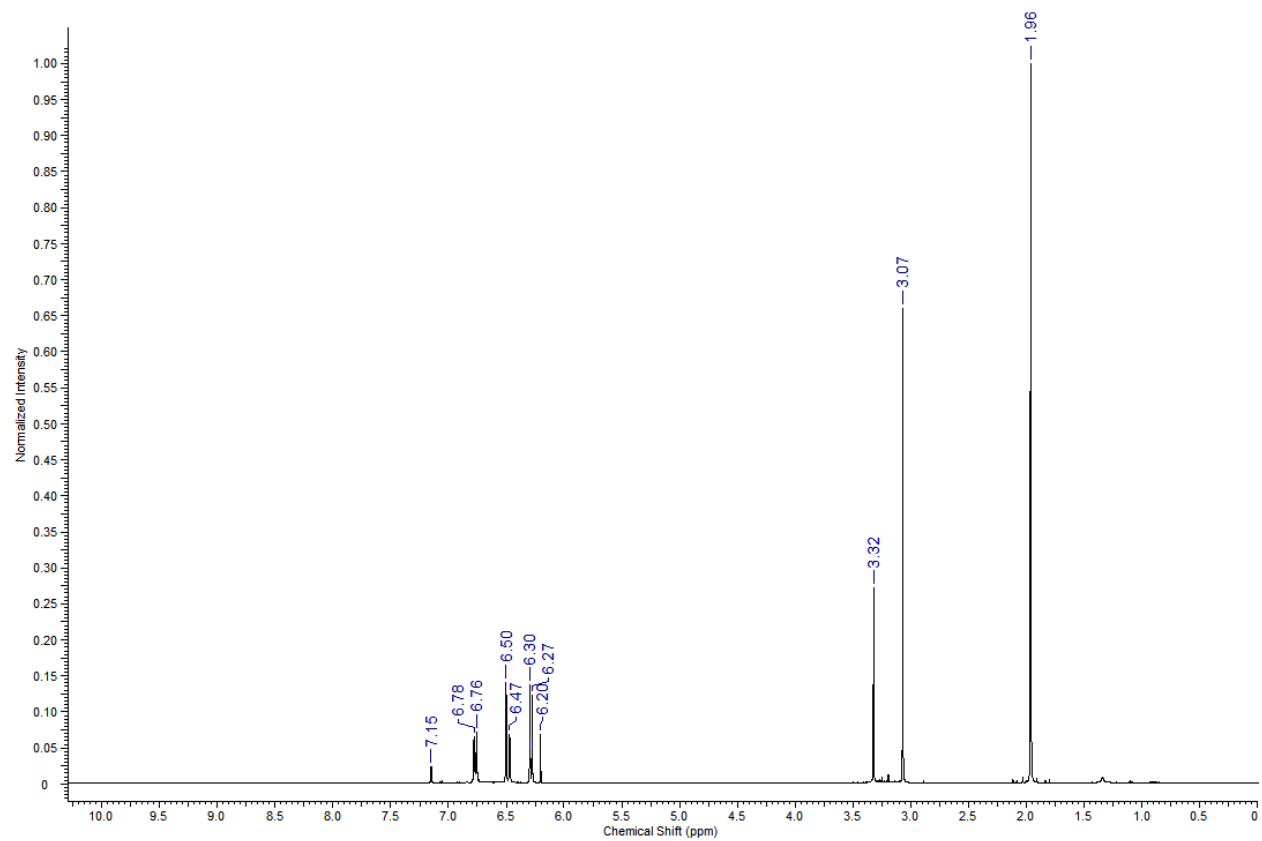

**Figure S27.** <sup>1</sup>H NMR of 3,5-dimethylphenyl azide and 4-methoxyphenyl isocyanide prior to the addition of the catalyst (the resonances at 3.32 and 6.20 belong to the internal standard TMB).

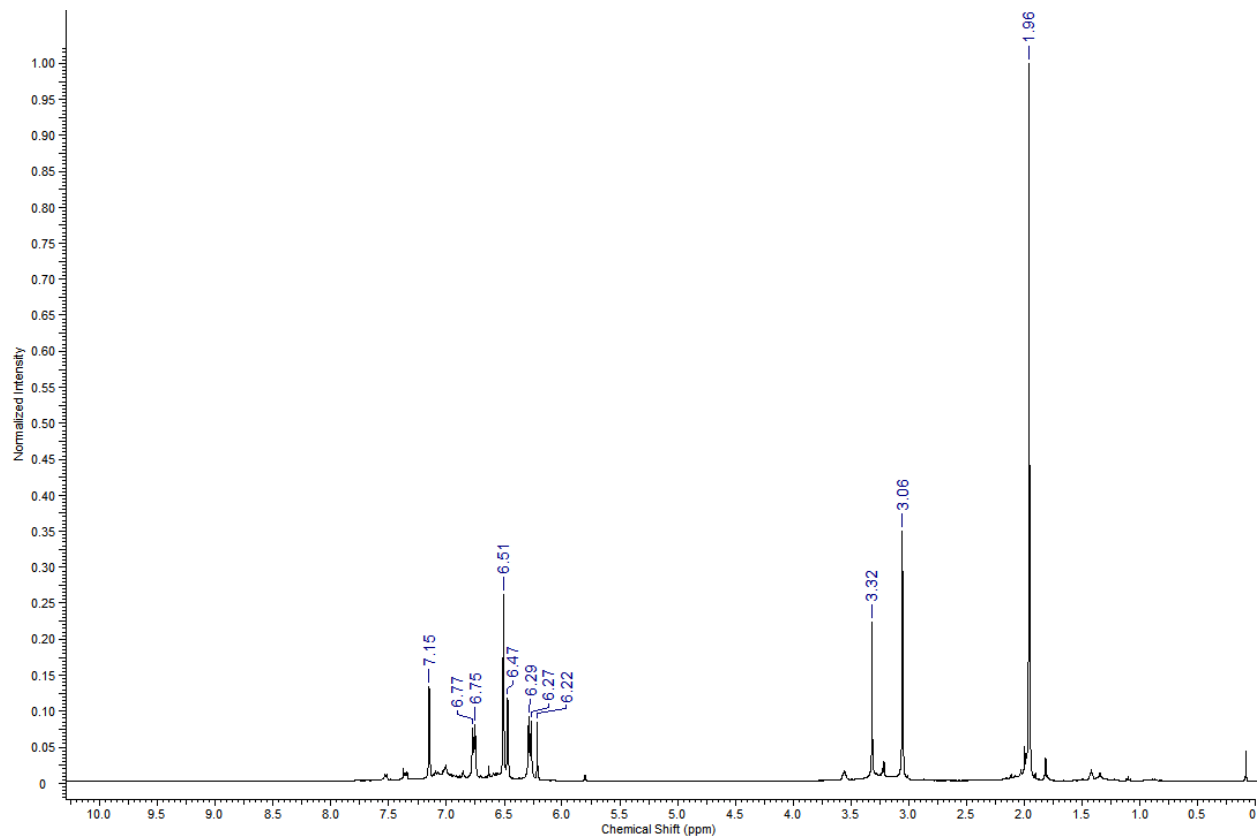

**Figure S28.** <sup>1</sup>H NMR of the reaction mixture containing 3,5-dimethyl phenyl azide, 4-methoxyphenyl isocyanide, and **2**, showing no formation of respective carbodiimide.

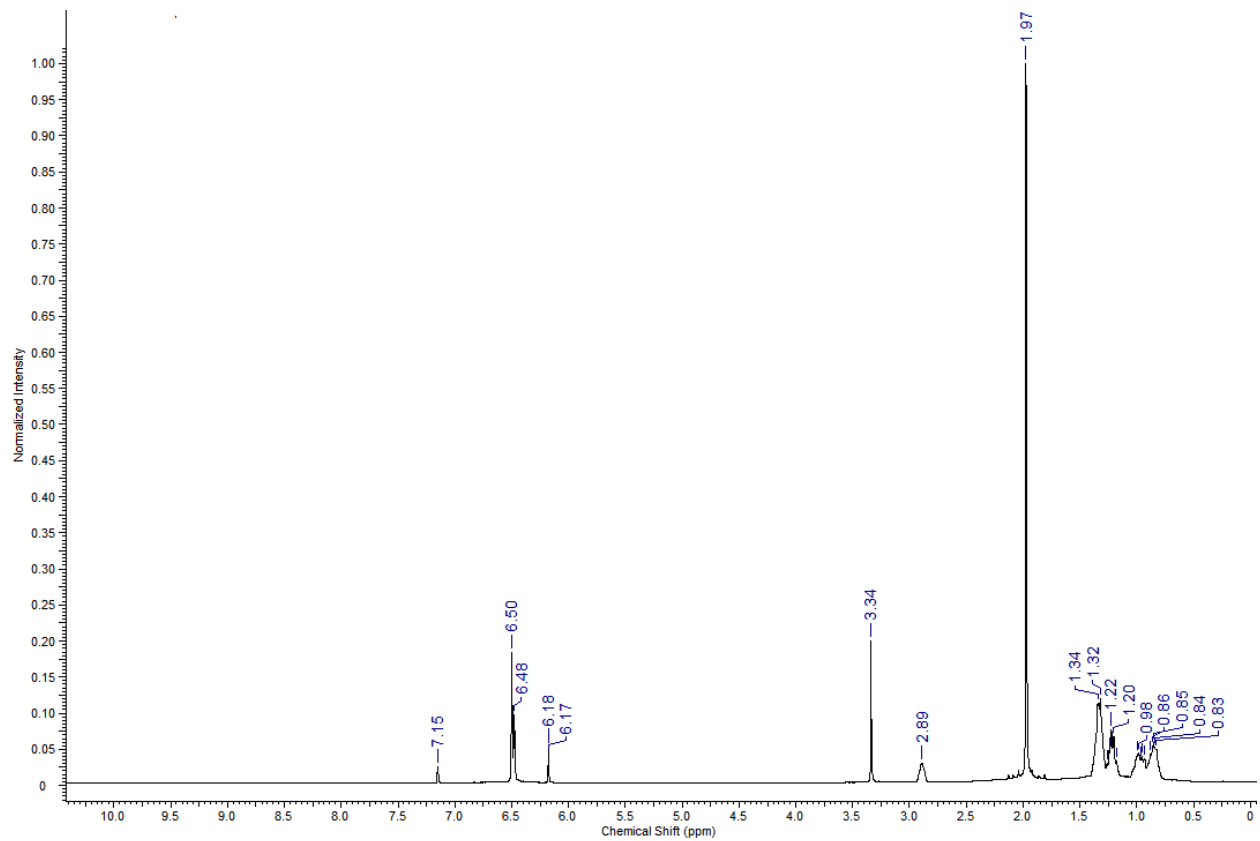

**Figure S29.** <sup>1</sup>H NMR of 3,5-dimethylphenyl azide and cyclohexyl isocyanide prior to the addition of the catalyst (the resonances at 3.34 and 6.18 belong to the internal standard TMB).

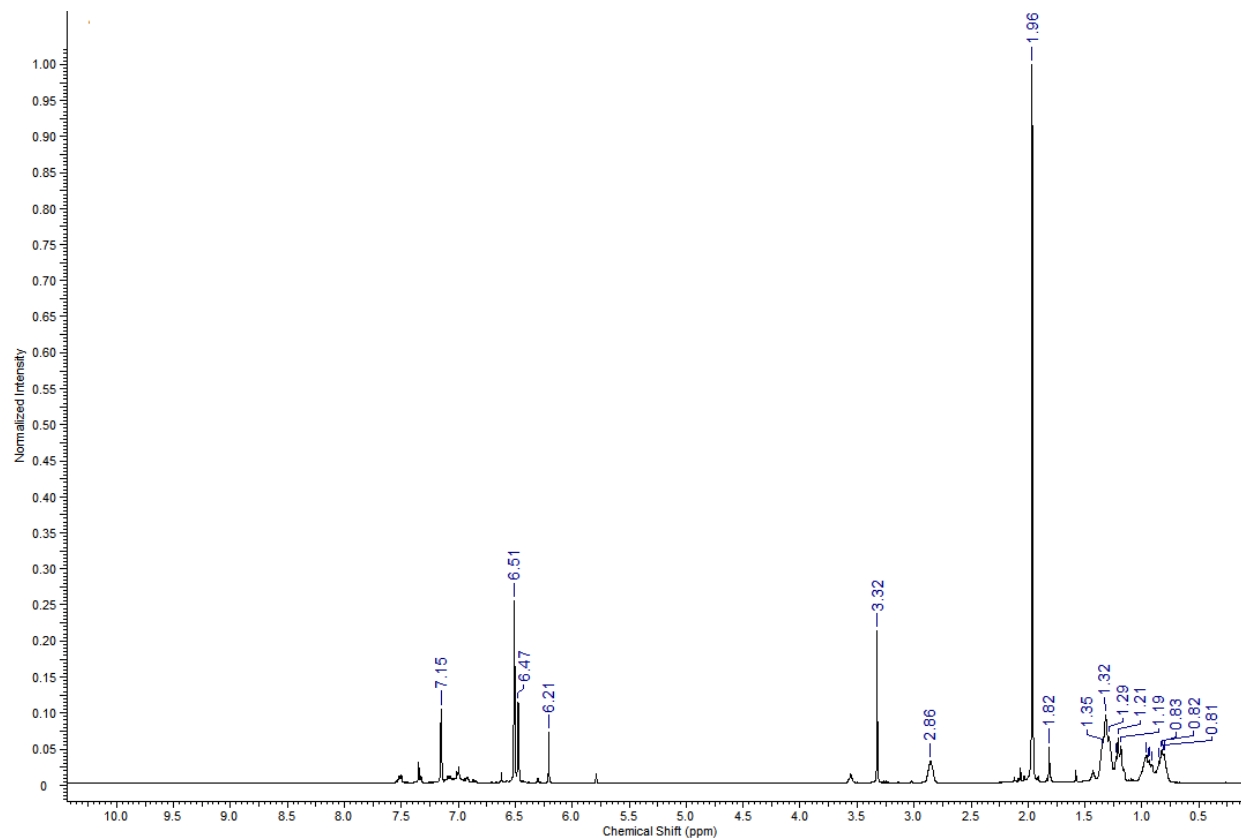

**Figure S30.** <sup>1</sup>H NMR of the reaction mixture containing 3,5-dimethylphenyl azide, cyclohexyl isocyanide, and **2**, showing no formation of respective carbodiimide (see experimental for the reaction details).



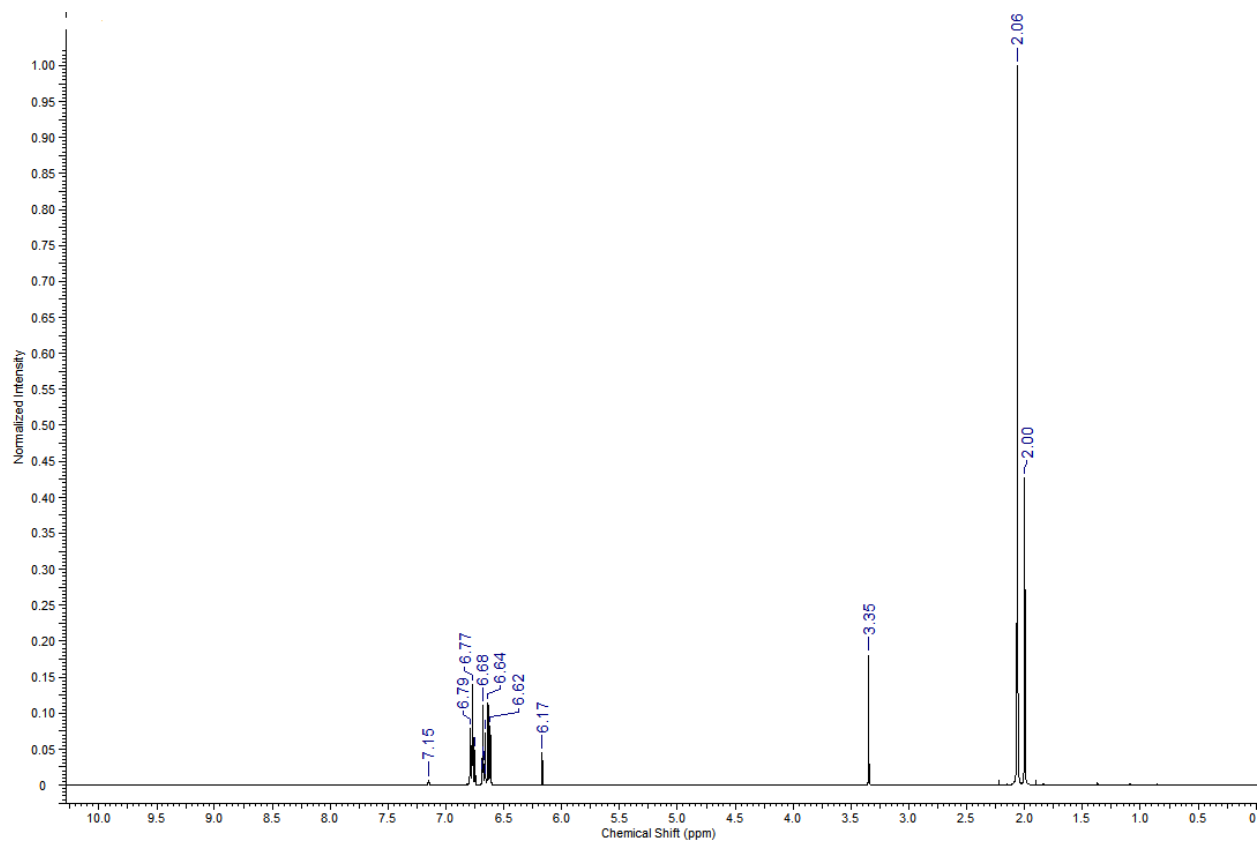

**Figure S31.** <sup>1</sup>H NMR of p-tolyl azide and 2,6-dimethylphenyl isocyanide prior to the addition of the catalyst (the resonances at 3.35 and 6.17 belong to the internal standard TMB).

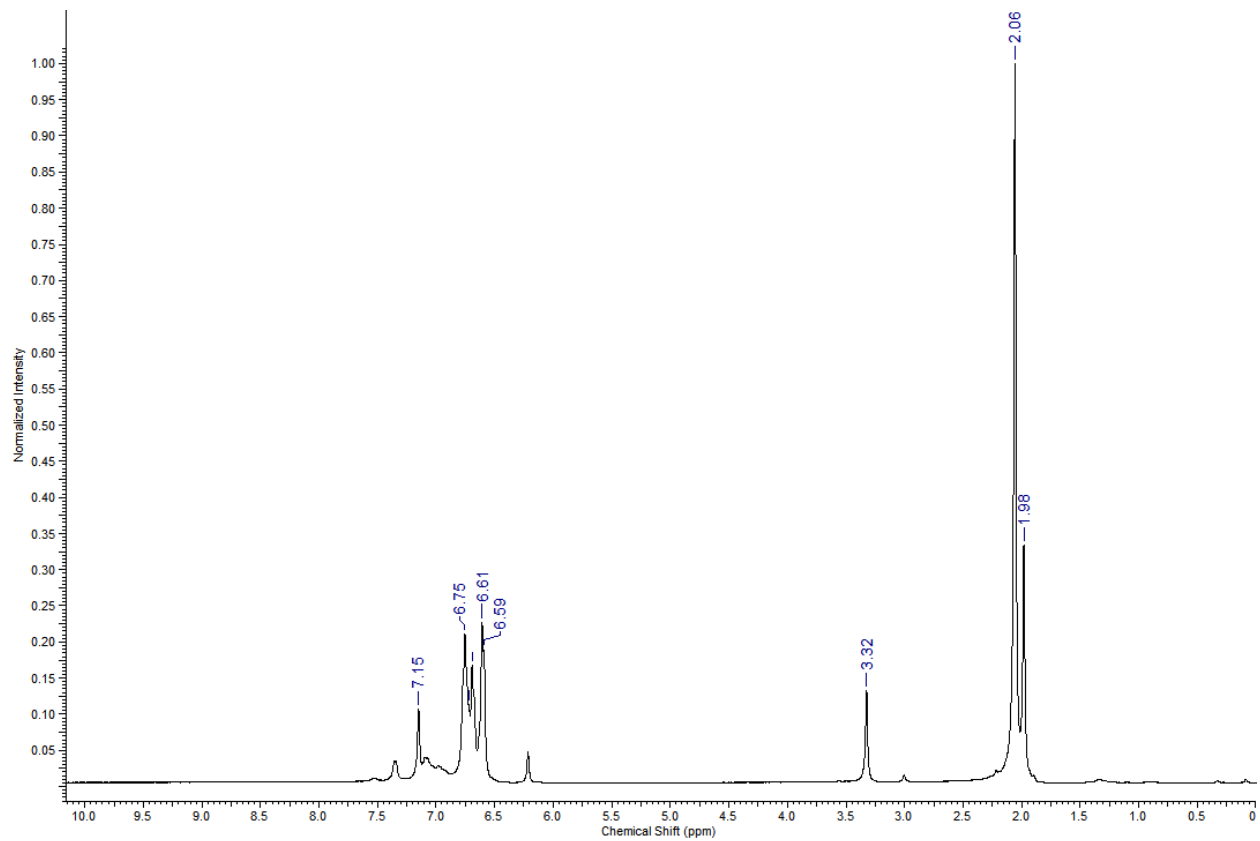

**Figure S32.** <sup>1</sup>H NMR of the reaction mixture containing p-tolyl azide, 2,6-dimethylphenyl isocyanide, and **2**, showing no formation of respective carbodiimide.

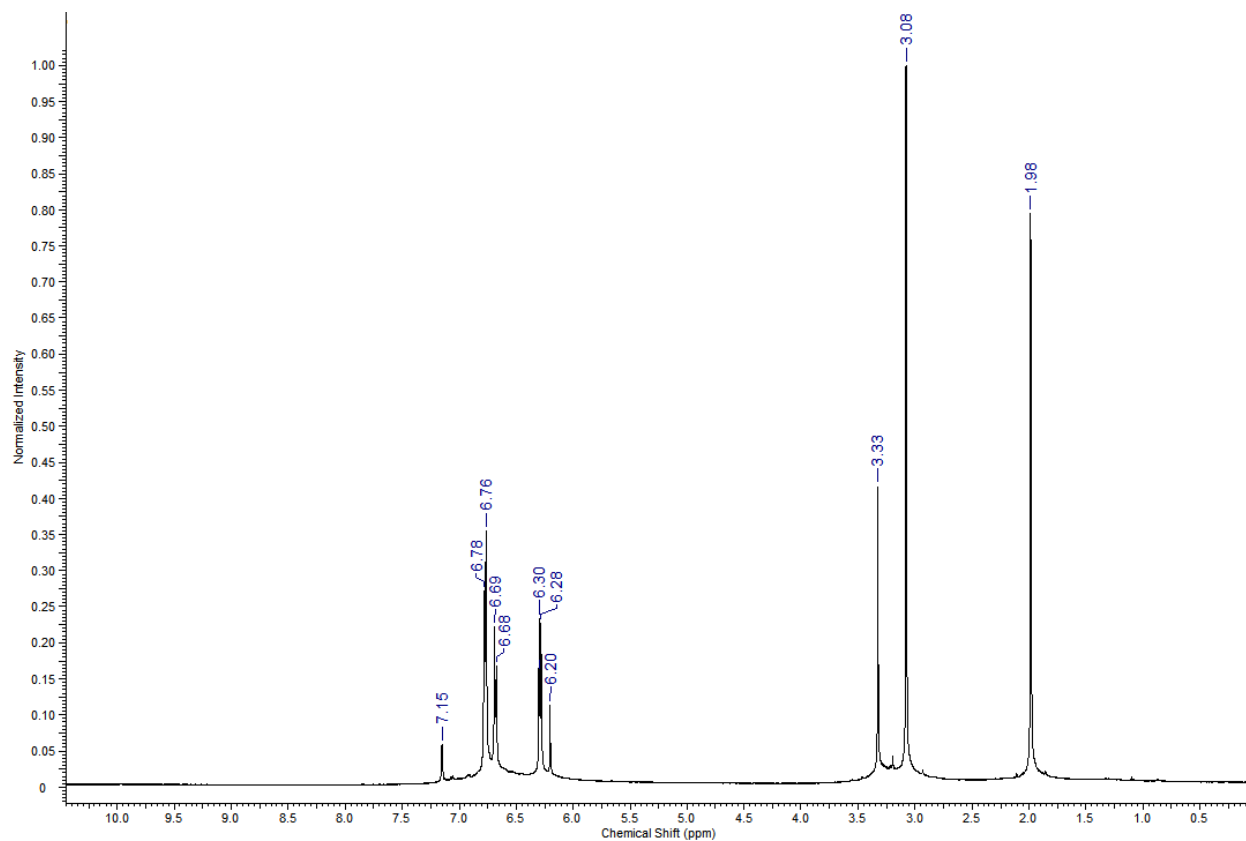

**Figure S33.** <sup>1</sup>H NMR of p-tolyl azide and 4-methoxyphenyl isocyanide prior to the addition of the catalyst (the resonances at 3.33 and 6.20 belong to the internal standard TMB).

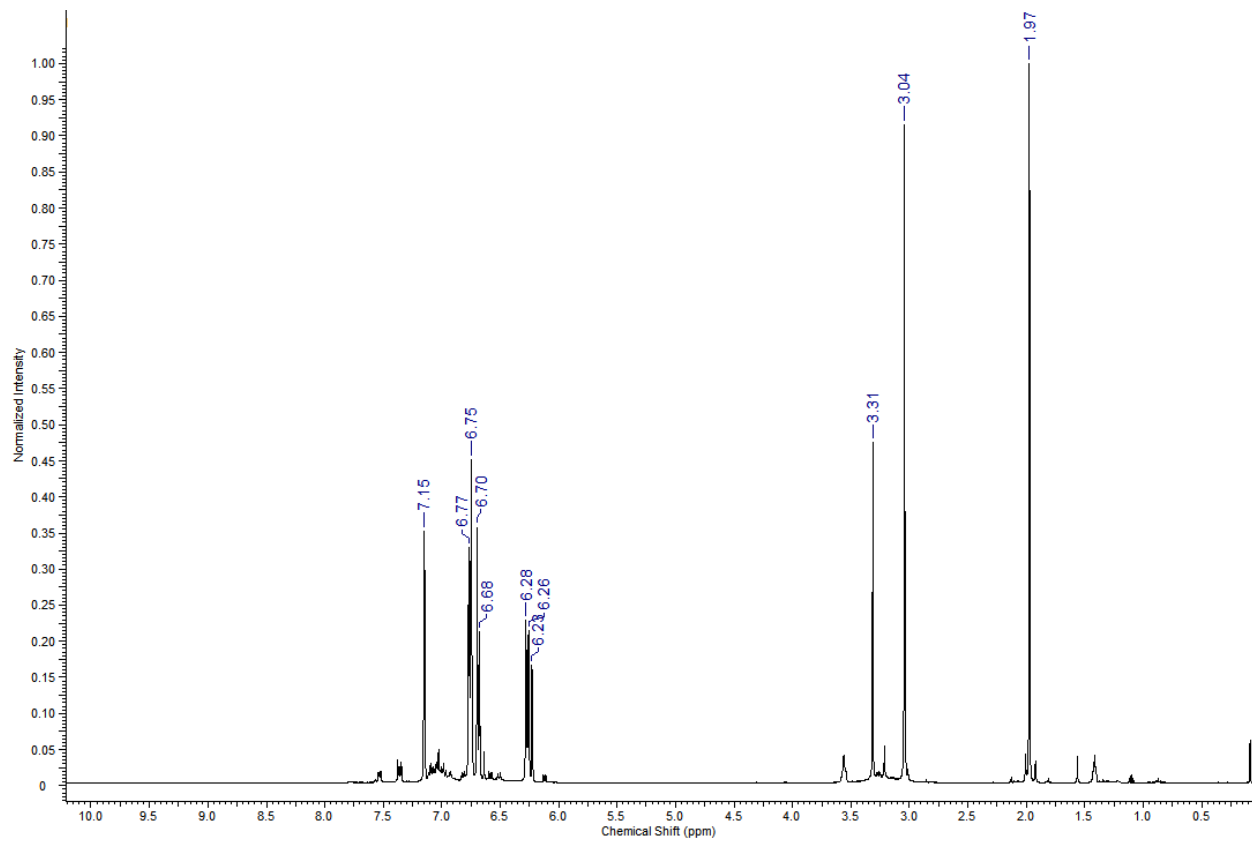

**Figure S34.** <sup>1</sup>H NMR of the reaction mixture containing p-tolyl azide, 4-methoxyphenyl isocyanide, and **2**, showing no formation of respective carbodiimide.

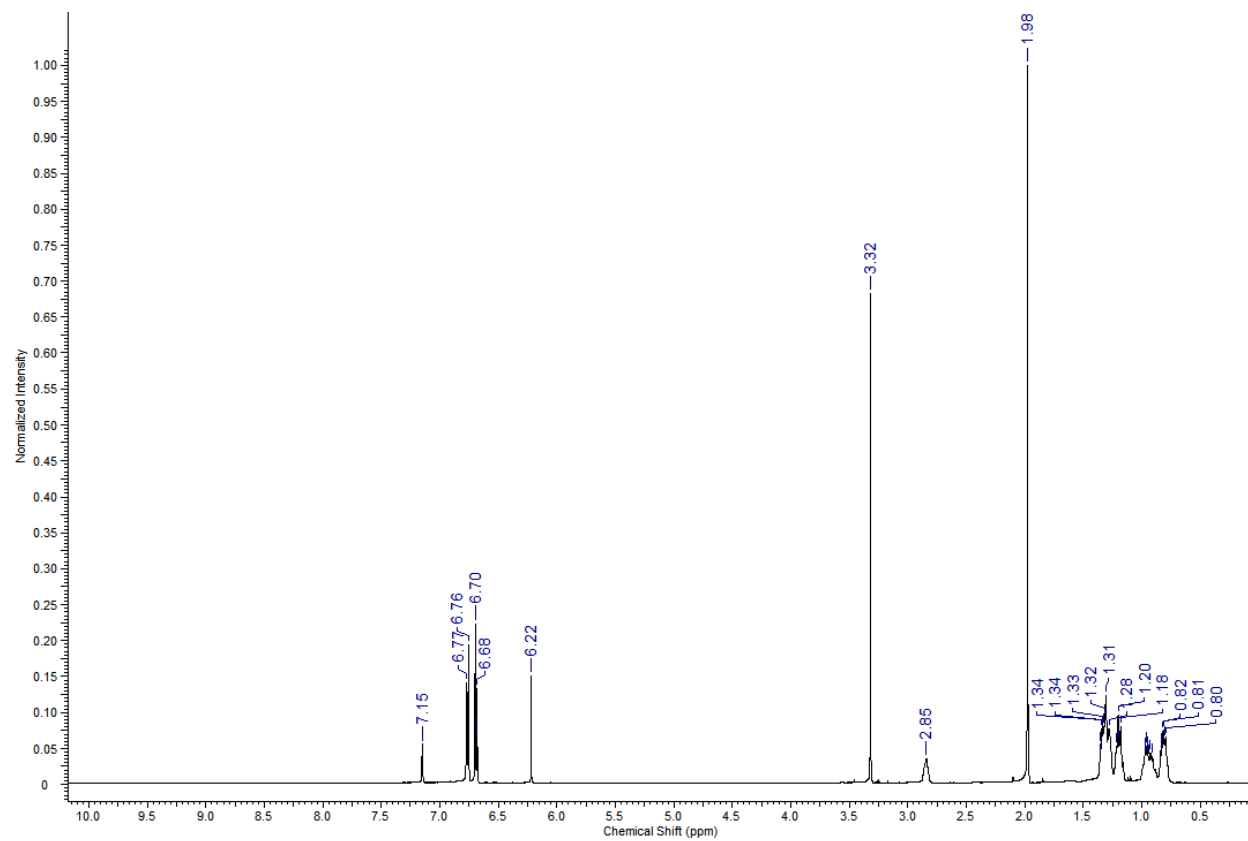

**Figure S35.** <sup>1</sup>H NMR of p-tolyl azide and cyclohexyl isocyanide prior to the addition of the catalyst (the resonances at 3.32 and 6.22 belong to the internal standard TMB).

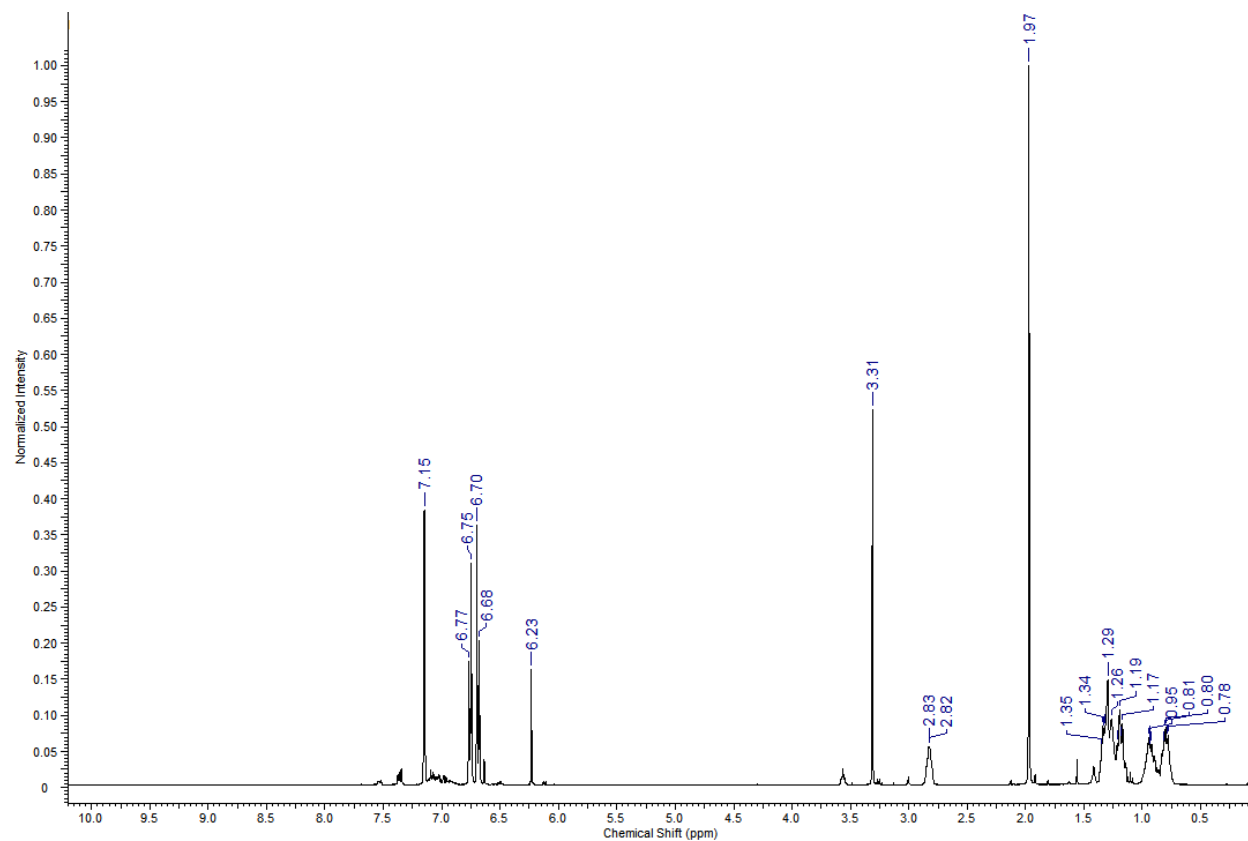

**Figure S36.** <sup>1</sup>H NMR of the reaction mixture containing p-tolyl azide, cyclohexyl isocyanide, and **2**, showing no formation of respective carbodiimide.

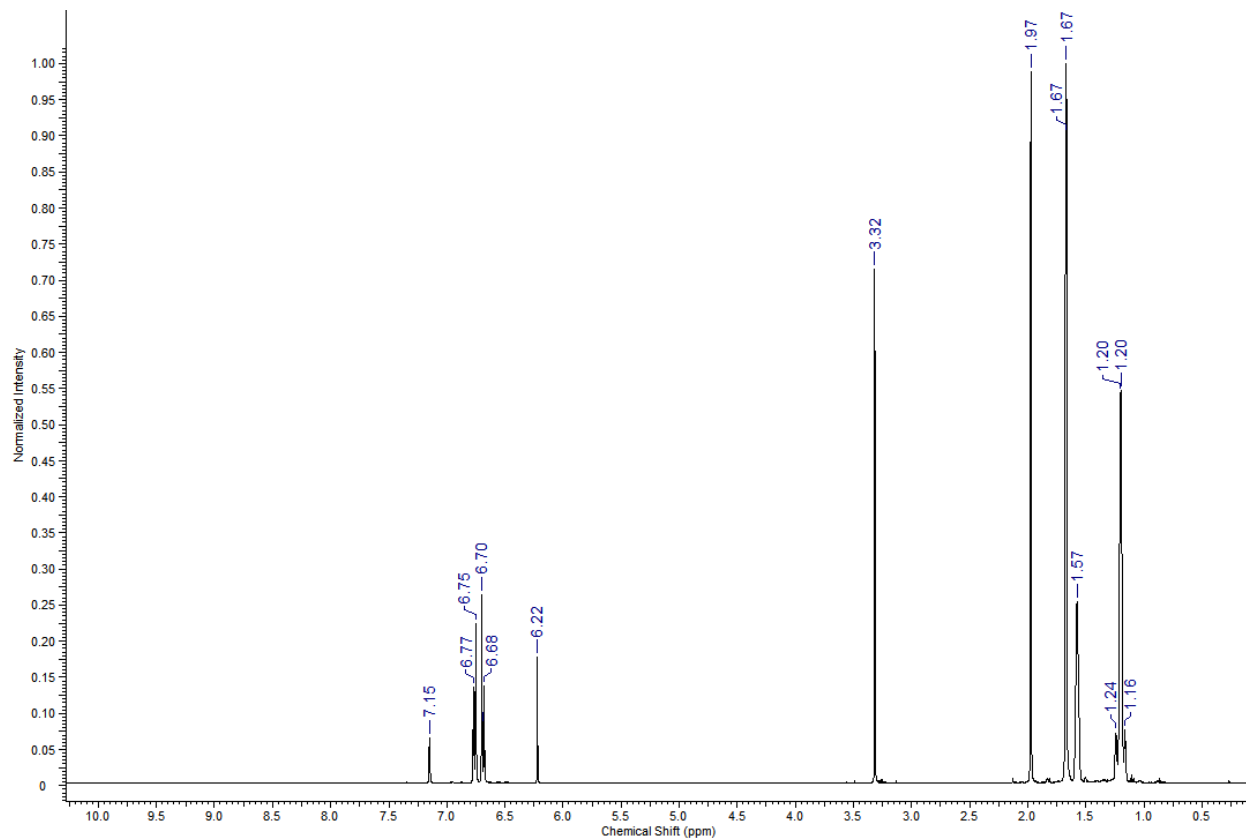

**Figure S37.**  $^1\text{H}$  NMR of p-tolyl azide and adamantyl isocyanide prior to the addition of the catalyst (the resonances at 3.32 and 6.22 ppm belong to the internal standard TMB).

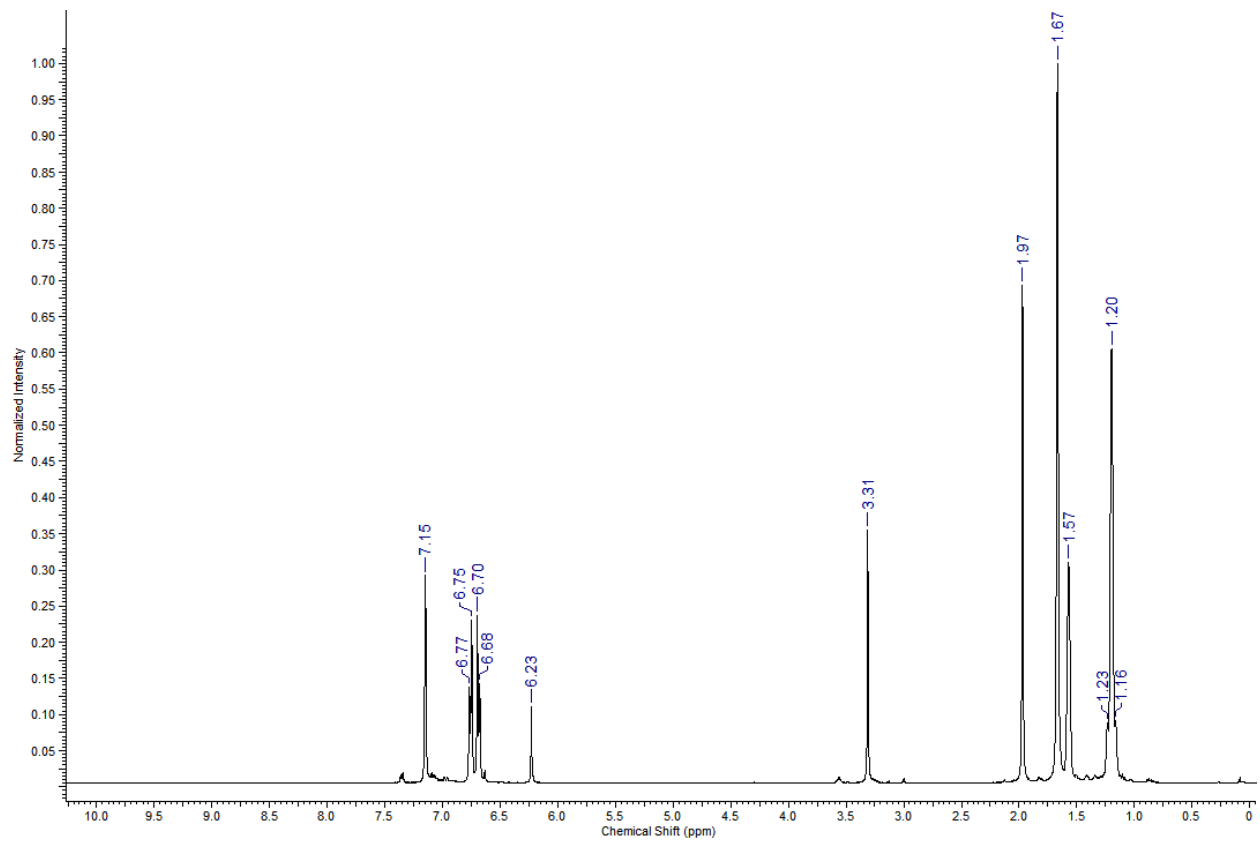

**Figure S38.** <sup>1</sup>H NMR of the reaction mixture containing p-tolyl azide, adamantyl isocyanide and **2**, showing no formation of respective carbodiimide.



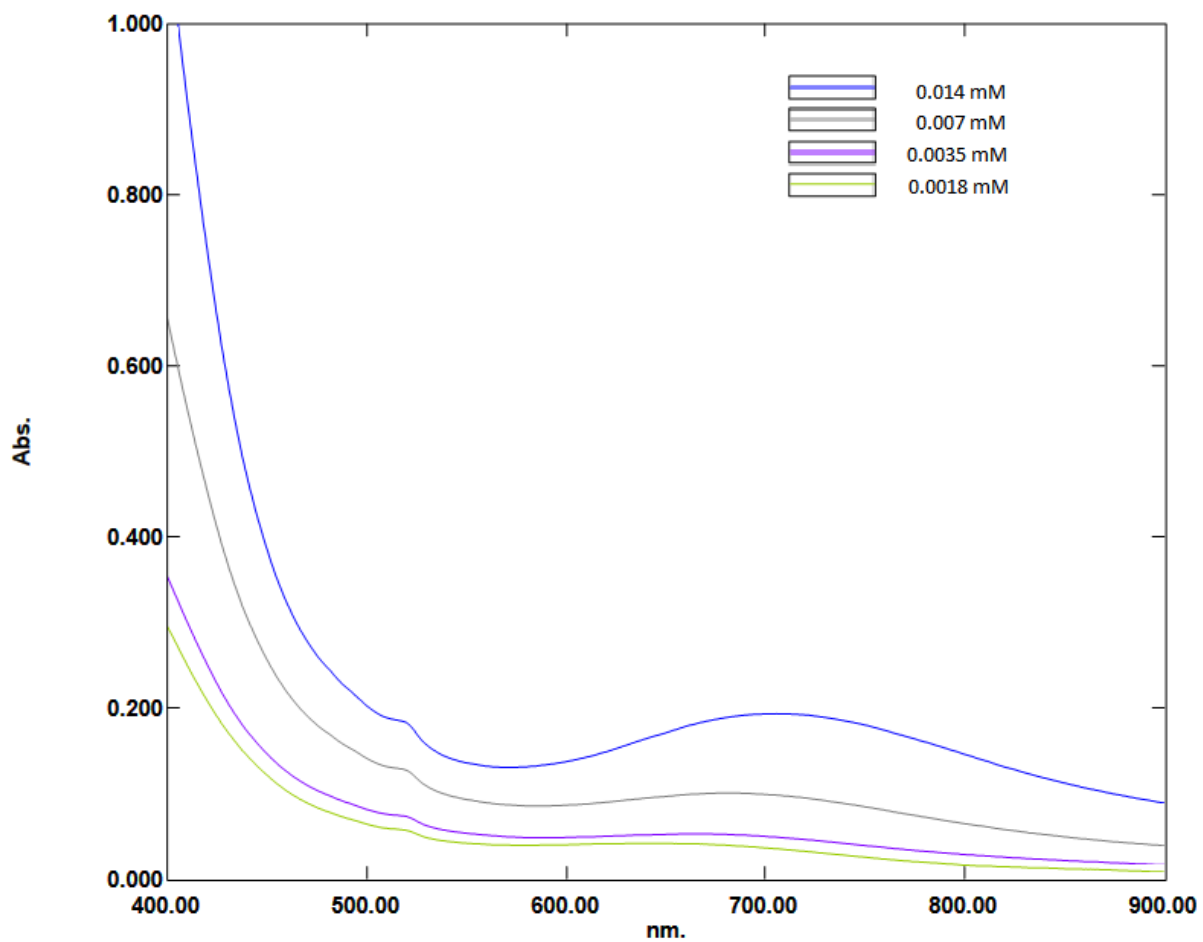

**Figure S39.** UV-Vis spectrum of  $\text{Cr}_2([\text{OO}]^{\text{Ph}})_2$

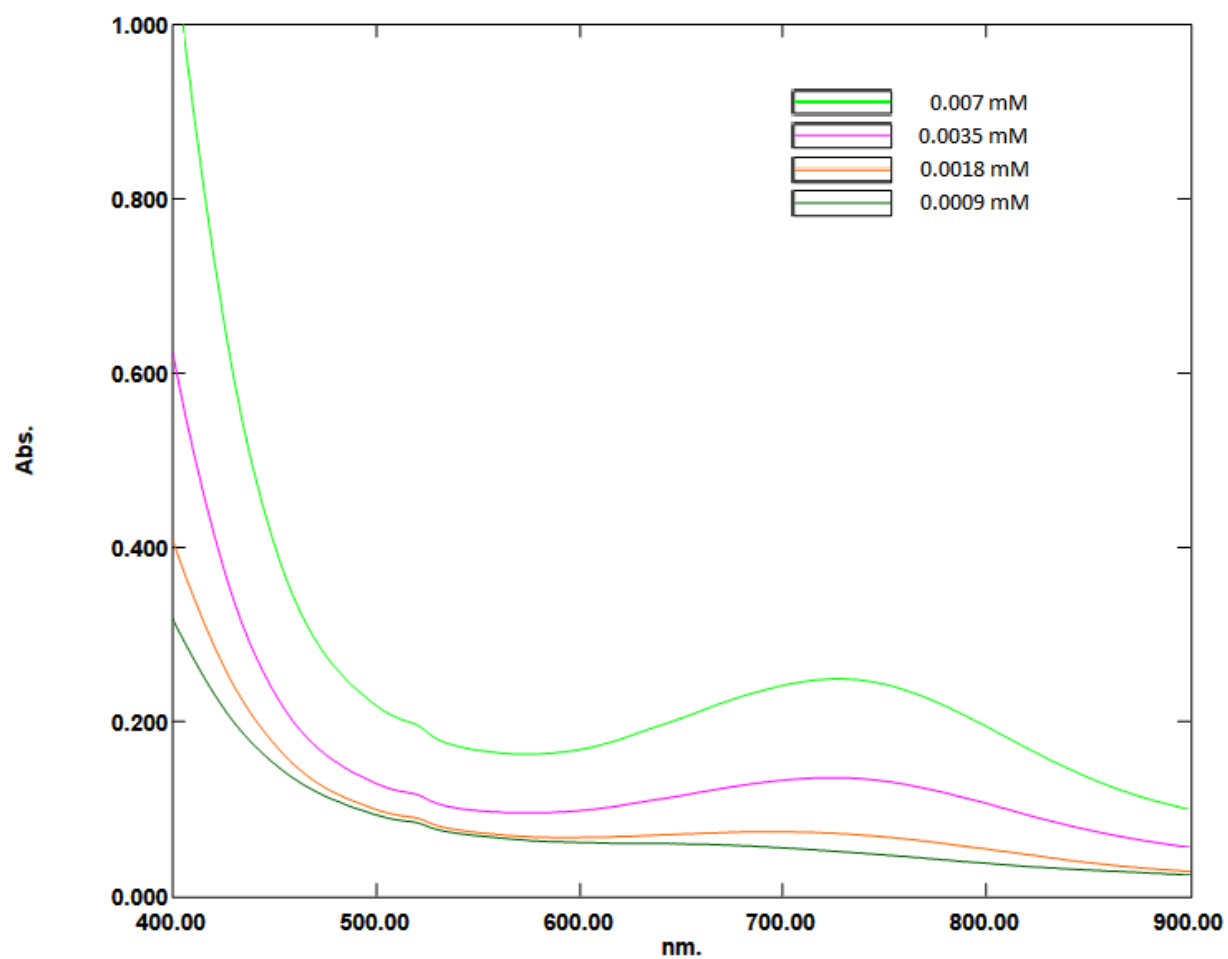

**Figure S40.** UV-Vis spectrum of  $\text{Cr}[\text{OO}]^{\text{Ph}}(\text{THF})_2$

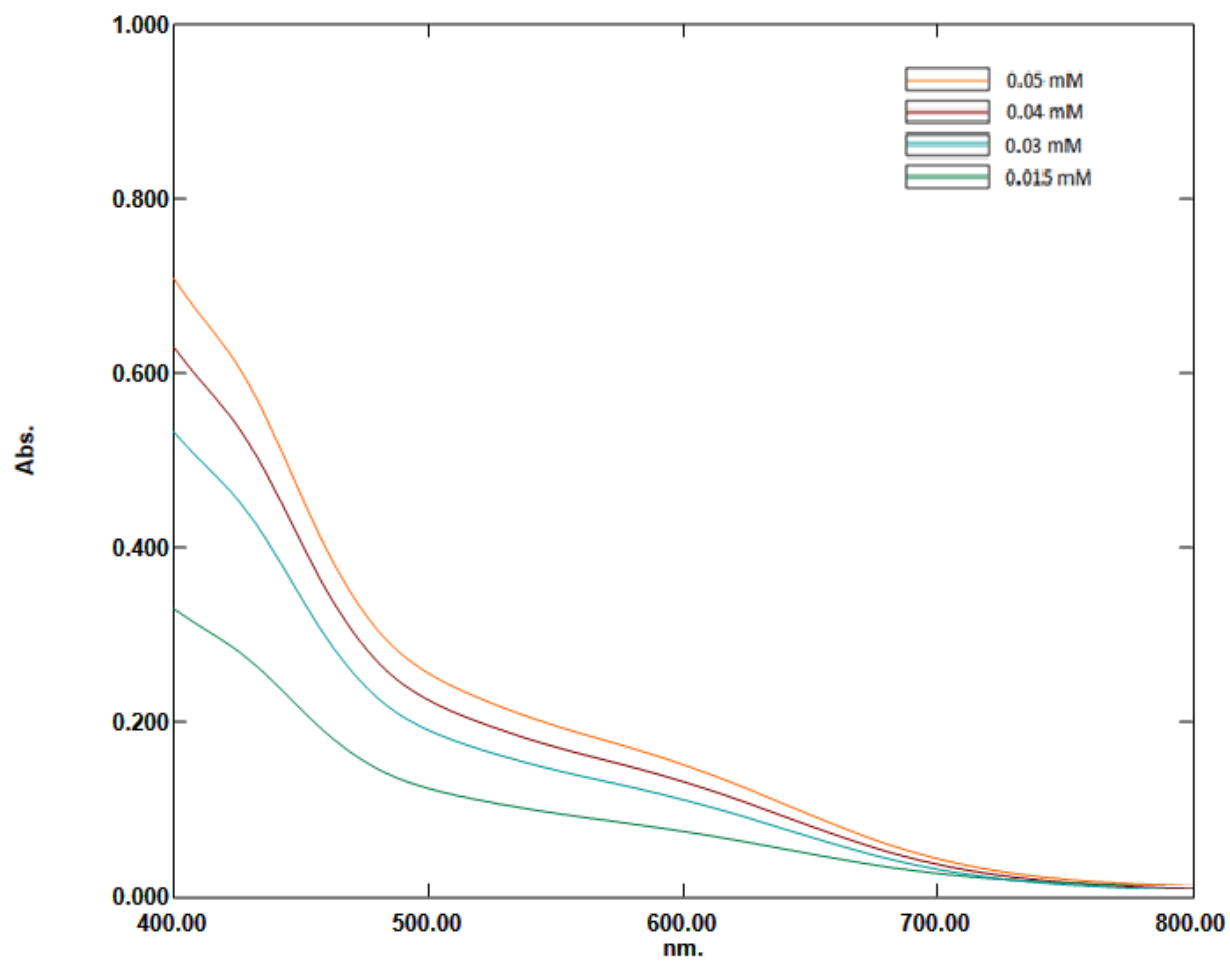

**Figure S41.** UV-Vis spectrum of  $\text{Cr}[\text{OO}]^{\text{Ph}}(\text{N}(4\text{-CH}_3\text{Ph}))_2$ .

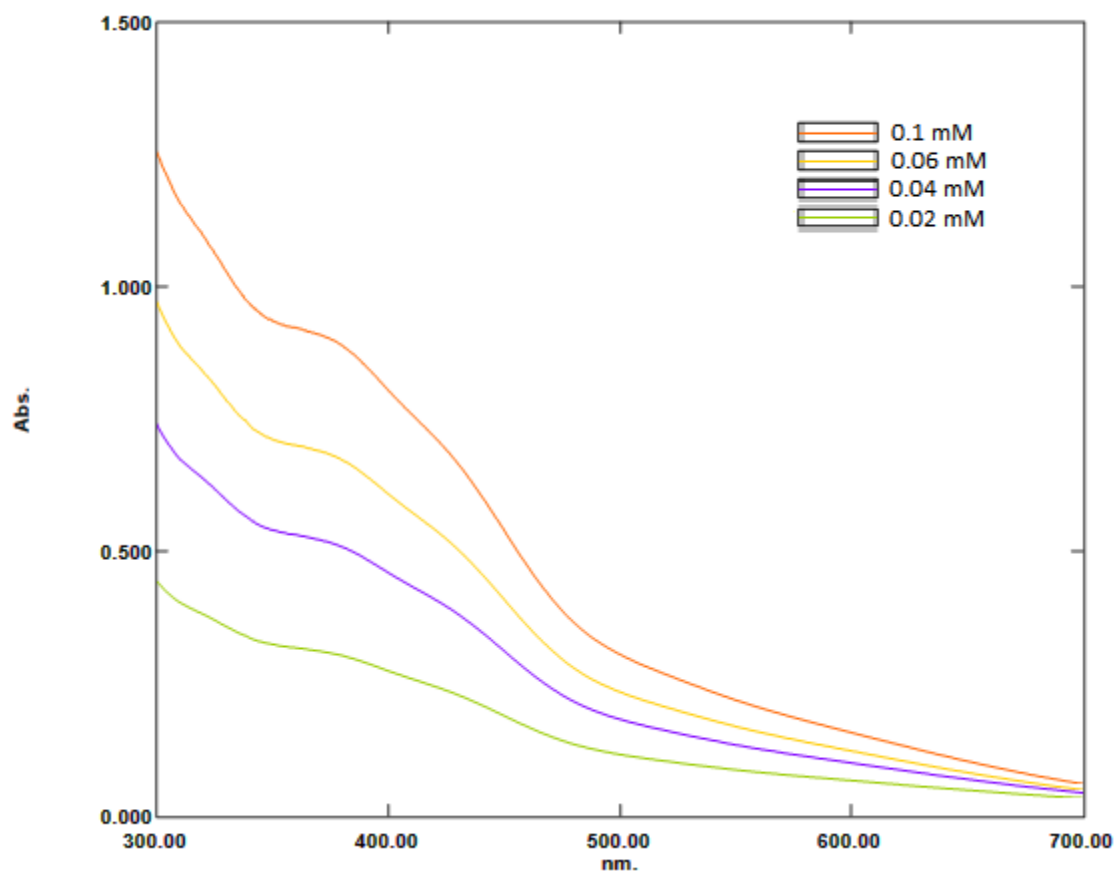

**Figure S42.** UV-Vis spectrum of  $\text{Cr}[\text{OO}]^{\text{Ph}}(\text{N}(4\text{-CH}_3\text{OPh}))_2$ .

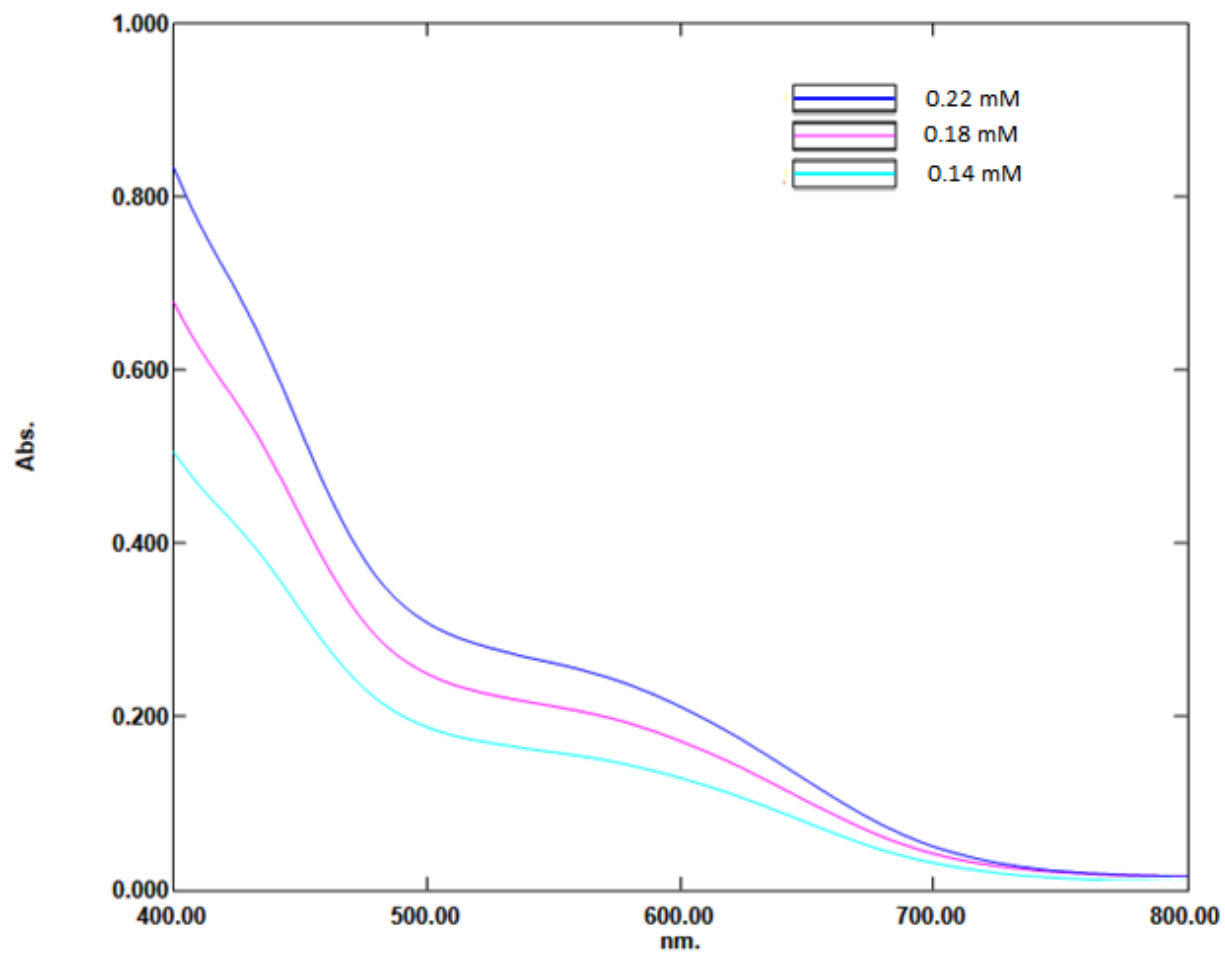

**Figure S43.** UV-Vis spectrum of  $\text{Cr}[\text{OO}]^{\text{Ph}}(\text{N}(3,5\text{-}(\text{CH}_3)_2\text{Ph}))_2$ .

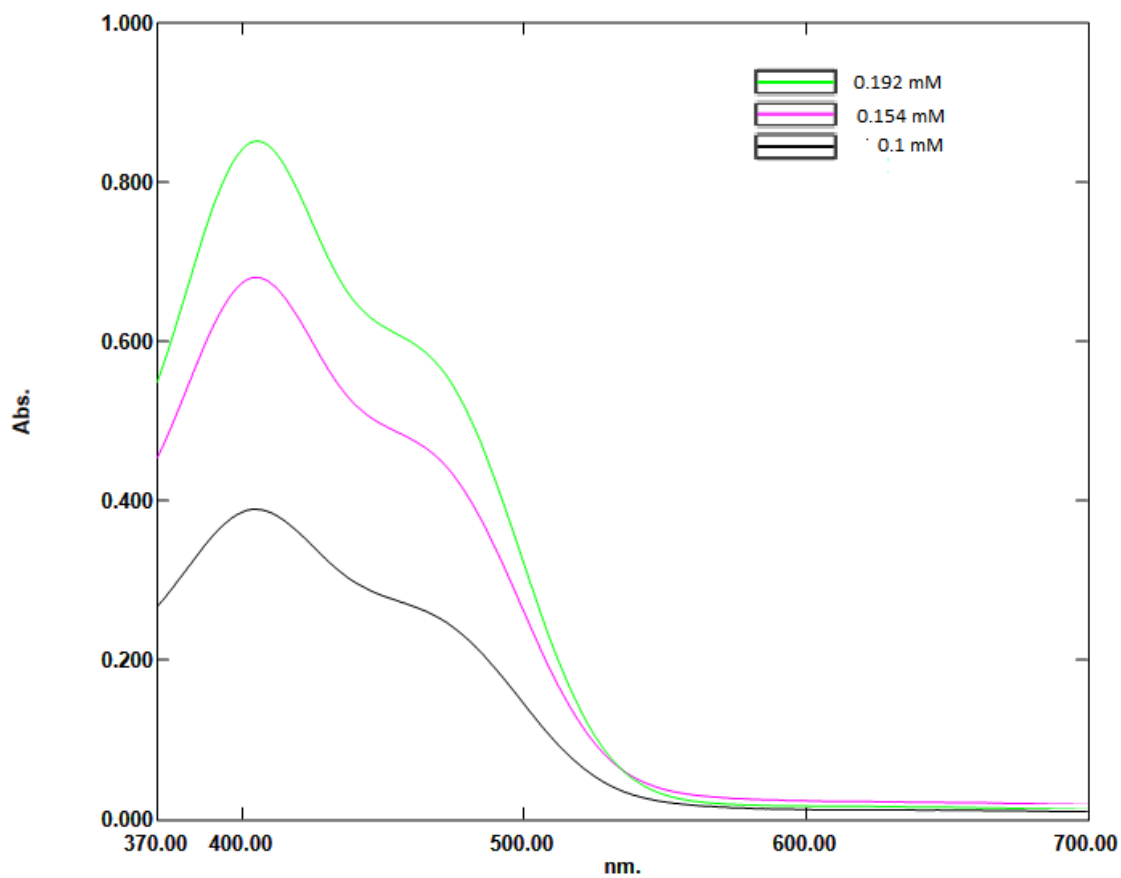

**Figure S44.** UV-Vis spectrum of  $\text{Cr}(\text{OO})^{\text{Ph}}(\text{CN}(2,6\text{-Me}_2\text{C}_6\text{H}_3))_4$ .  $\lambda_{\text{max}}$  ( $\epsilon_{\text{M}}$ ) : 405 (5050) and 466 (3500)

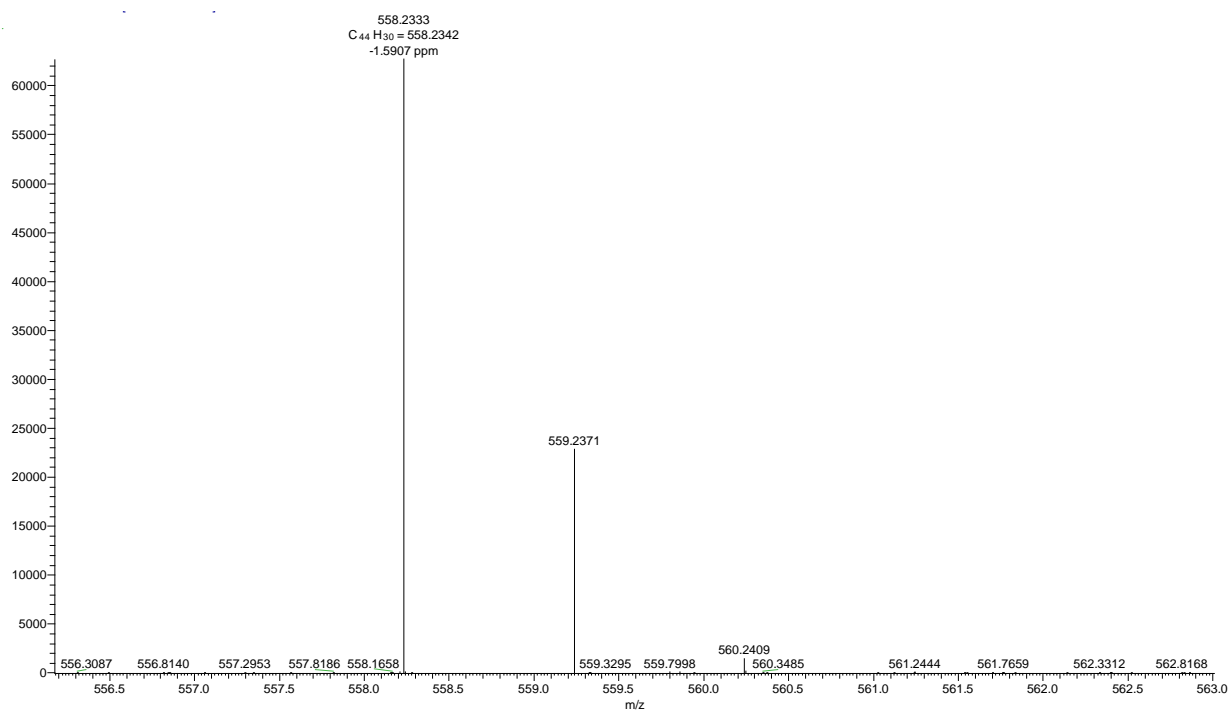

**Figure S45.** HRMS of 6,6,12,12-tetraphenyl-6,12-dihydroindeno[1,2-b]fluorine.

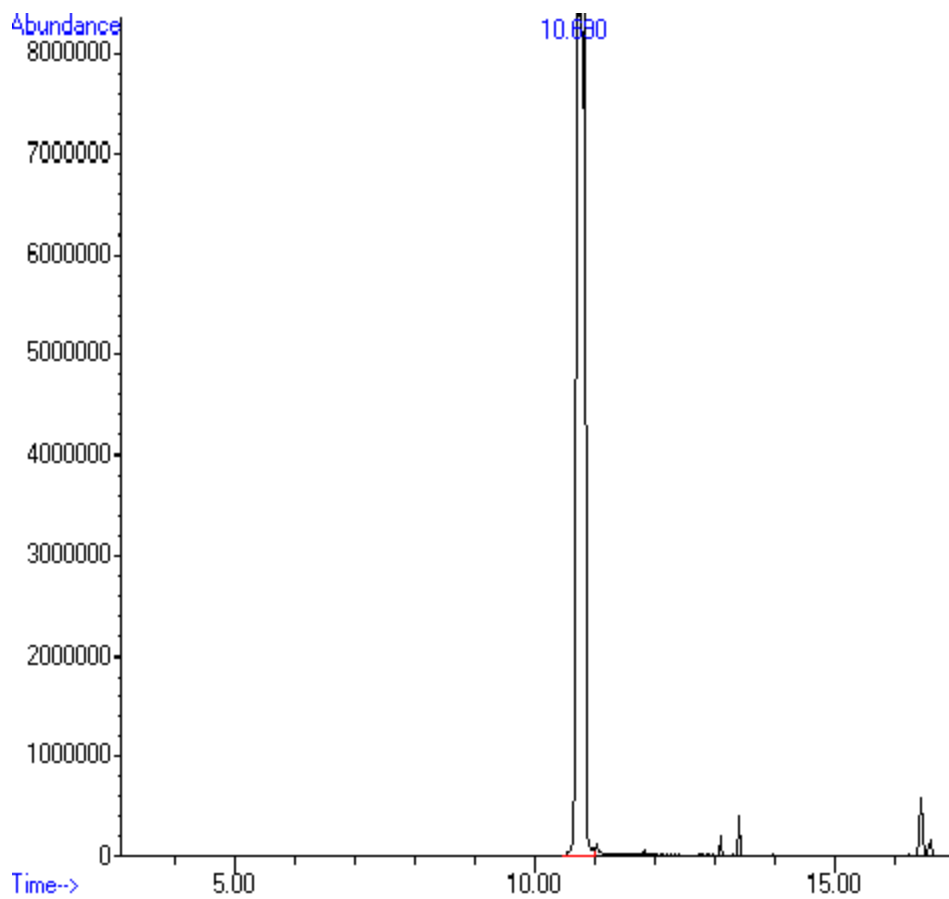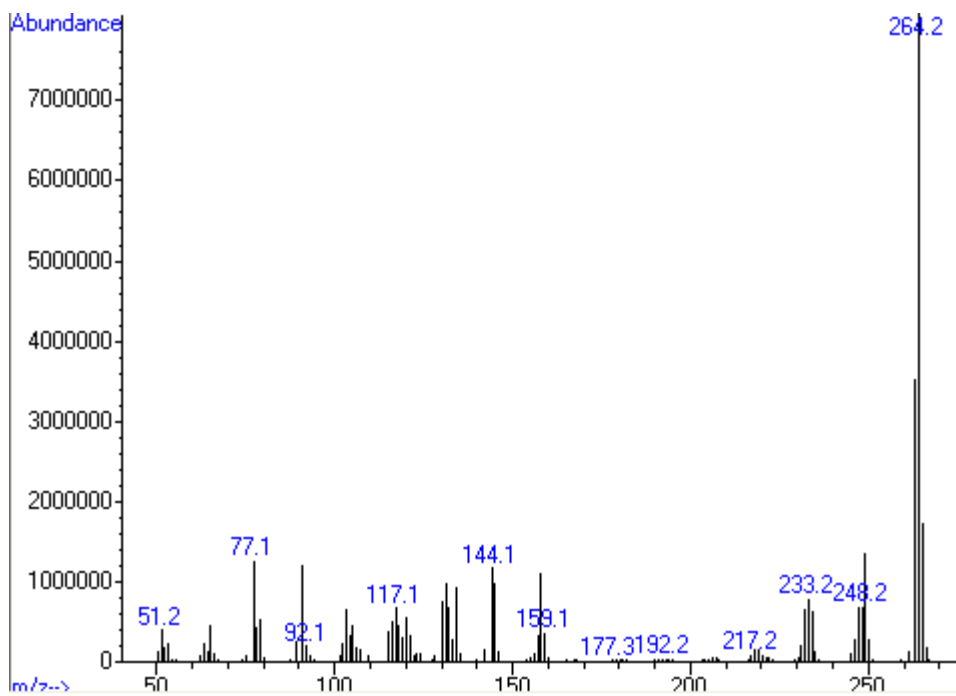

**Figure S46.** GC-MS of MesPhN=C=N(2,6-Me<sub>2</sub>C<sub>6</sub>H<sub>3</sub>).



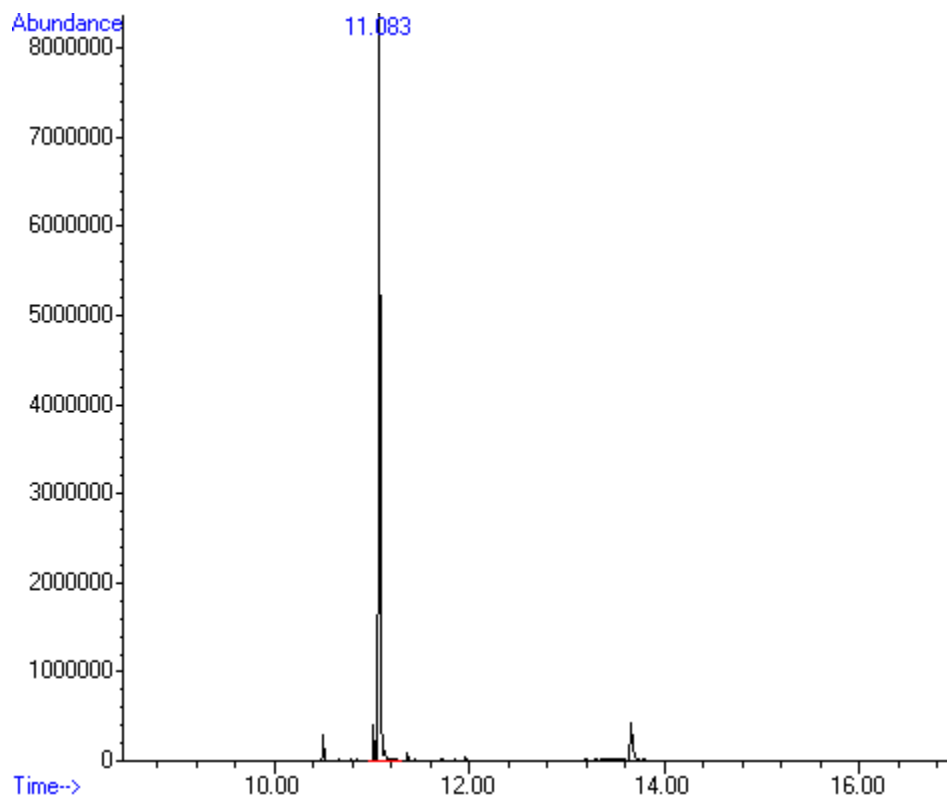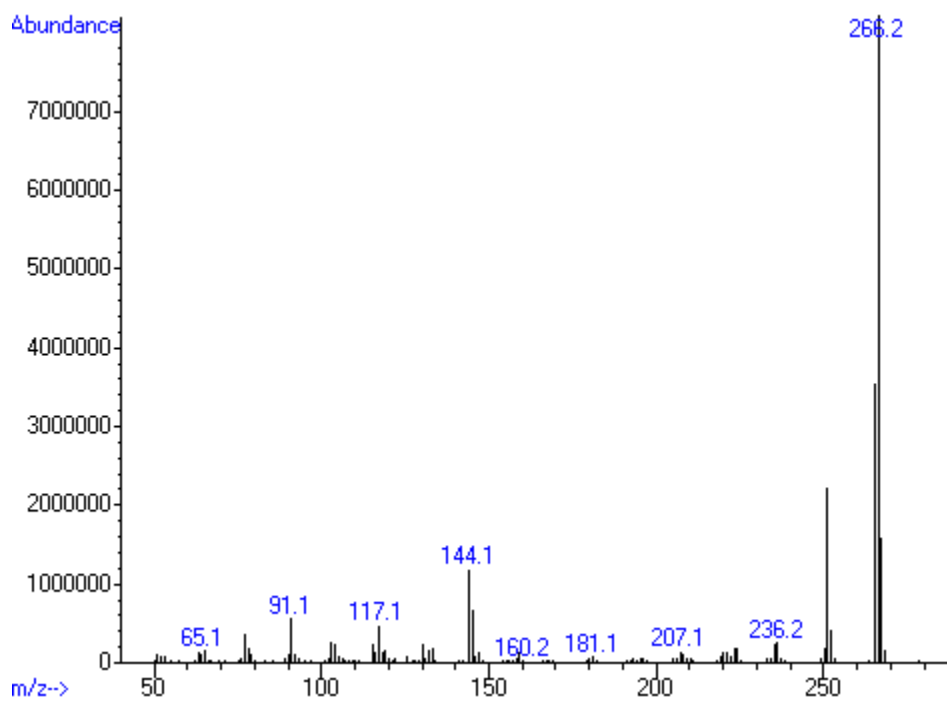

**Figure S47.** GC-MS of MesPhN=C=N(4-OMe<sub>3</sub>C<sub>6</sub>H<sub>4</sub>).

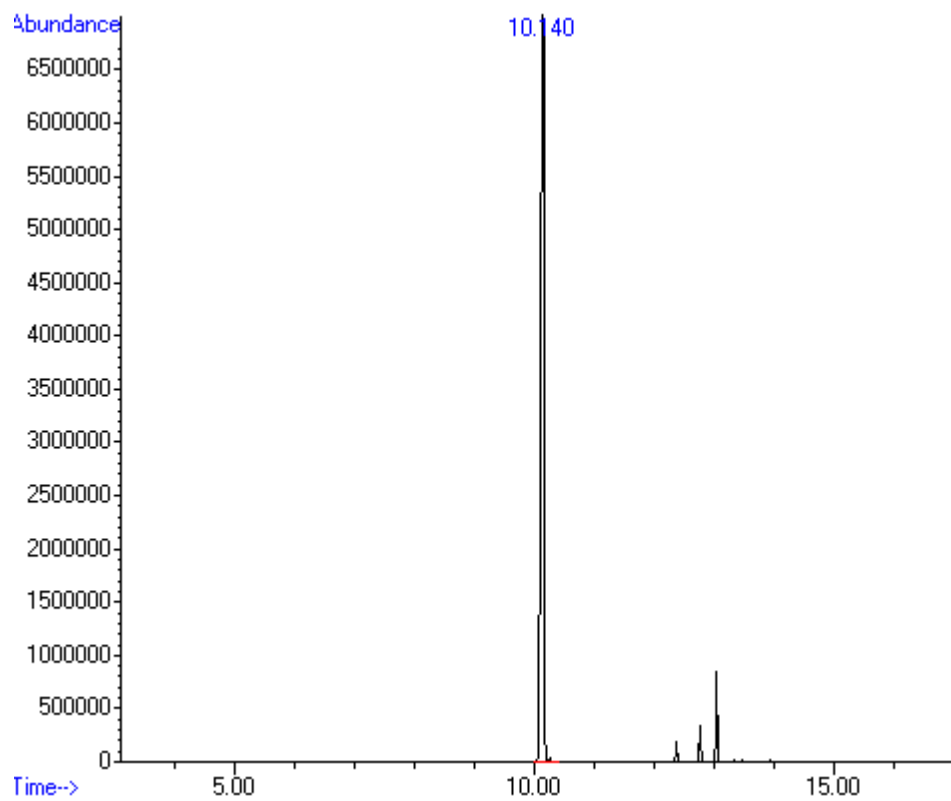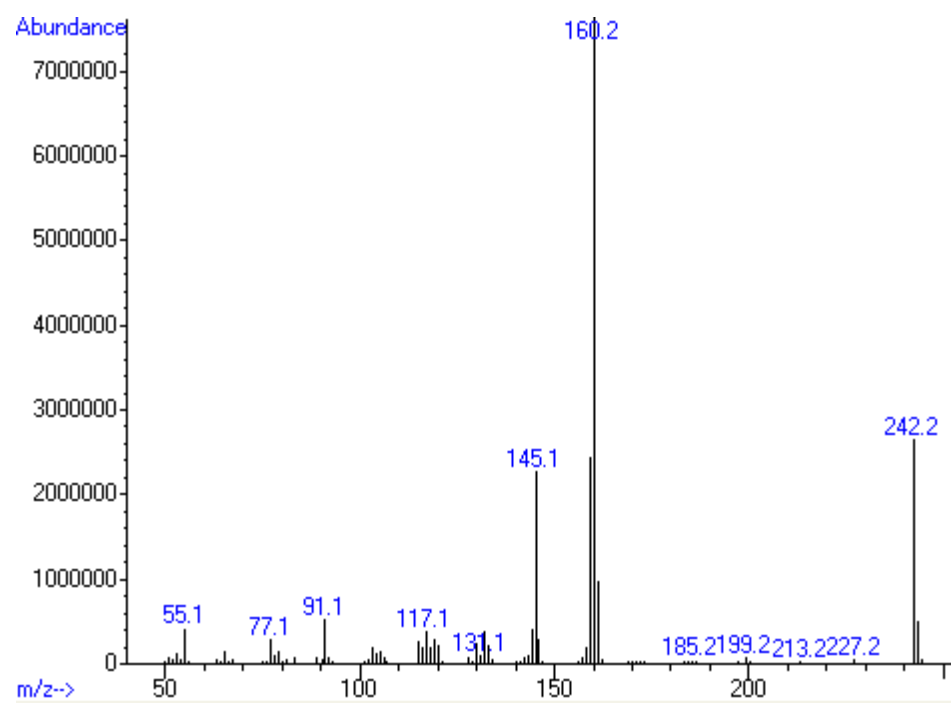

**Figure S48.** GC-MS of MesPhN=C=NCy.

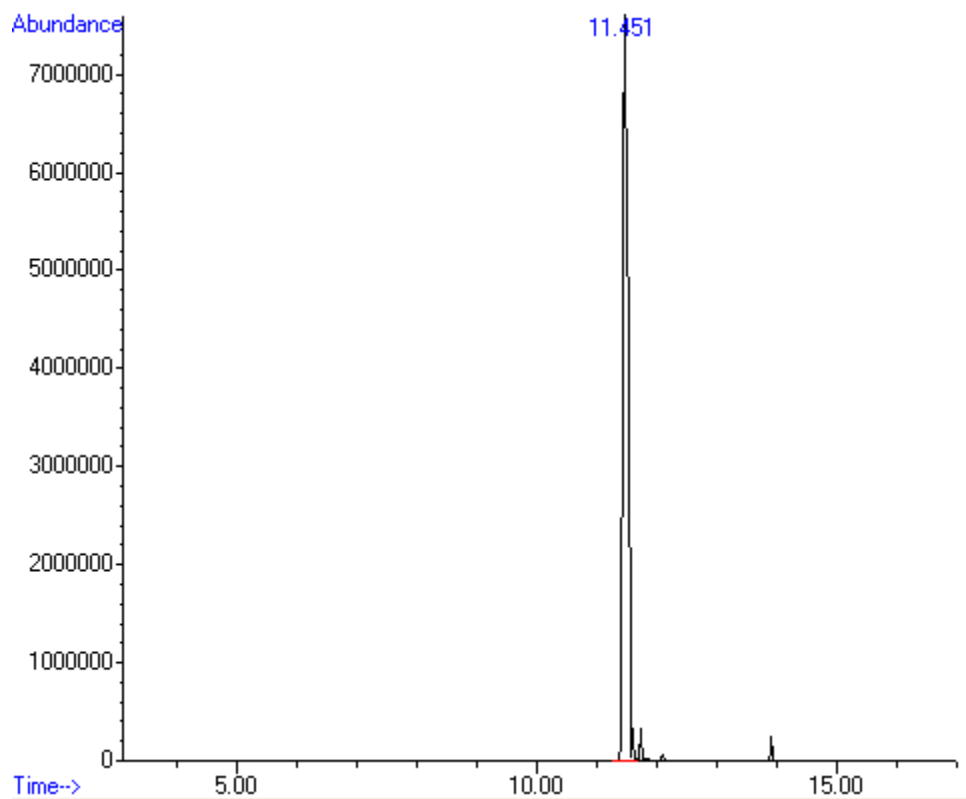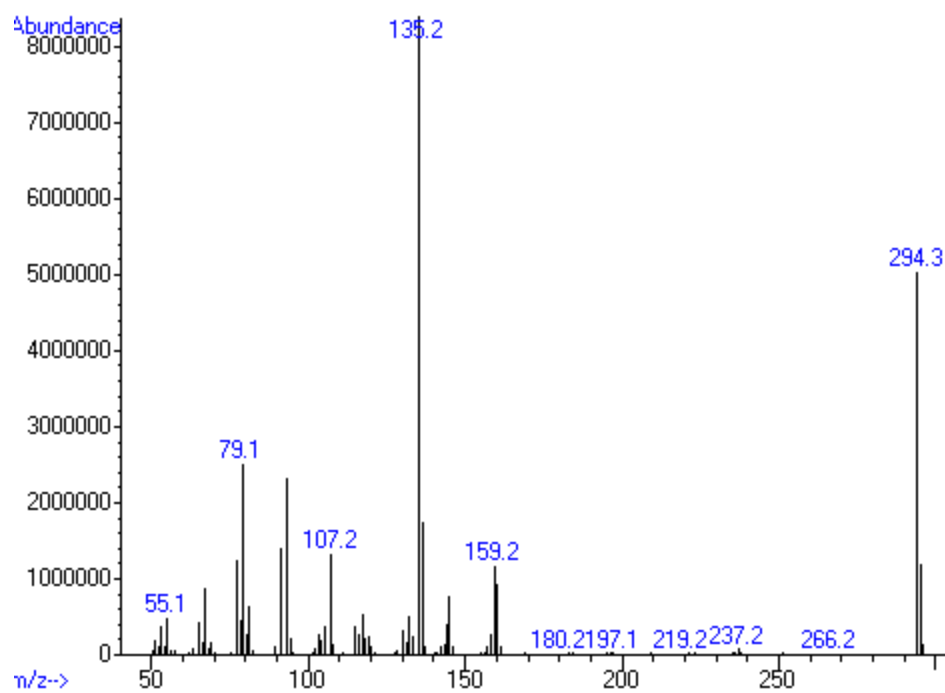

**Figure S49.** GC-MS of MesPhN=C=NAd.

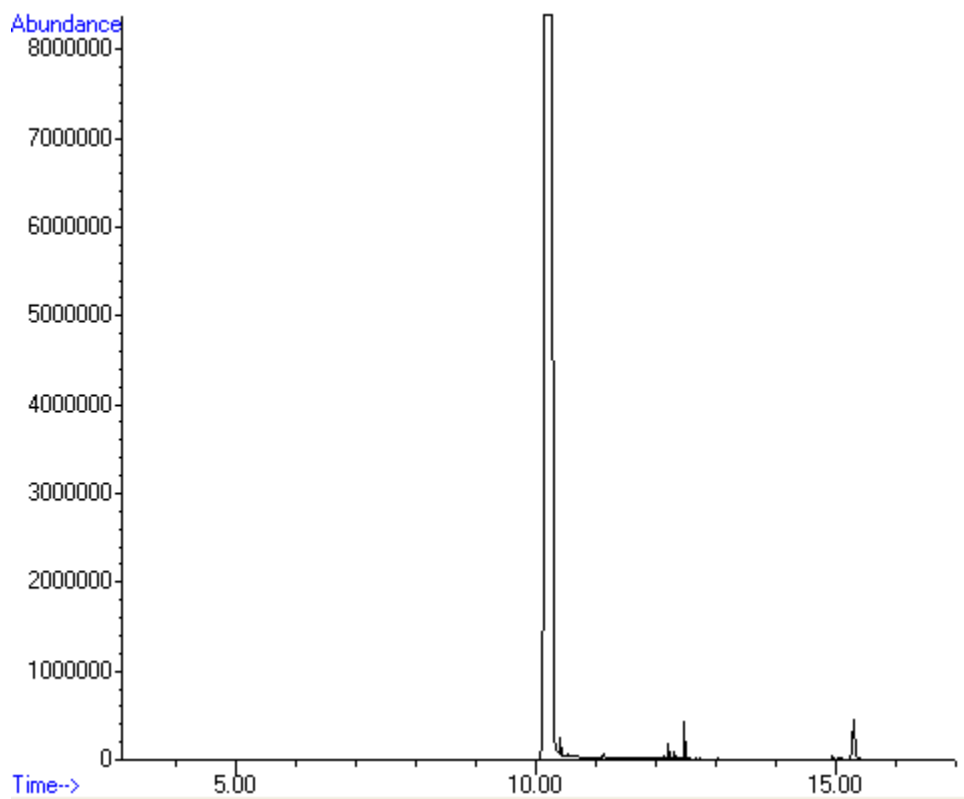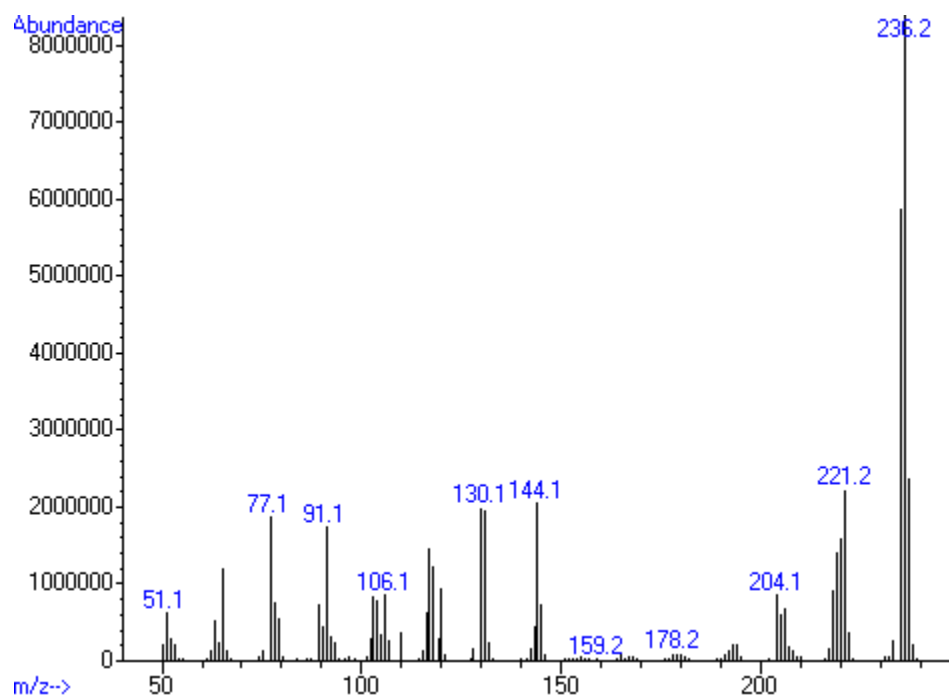

**Figure S50.** GC-MS of (2-MeC<sub>6</sub>H<sub>4</sub>)N=C=N(2,6-Me<sub>2</sub>C<sub>6</sub>H<sub>3</sub>).

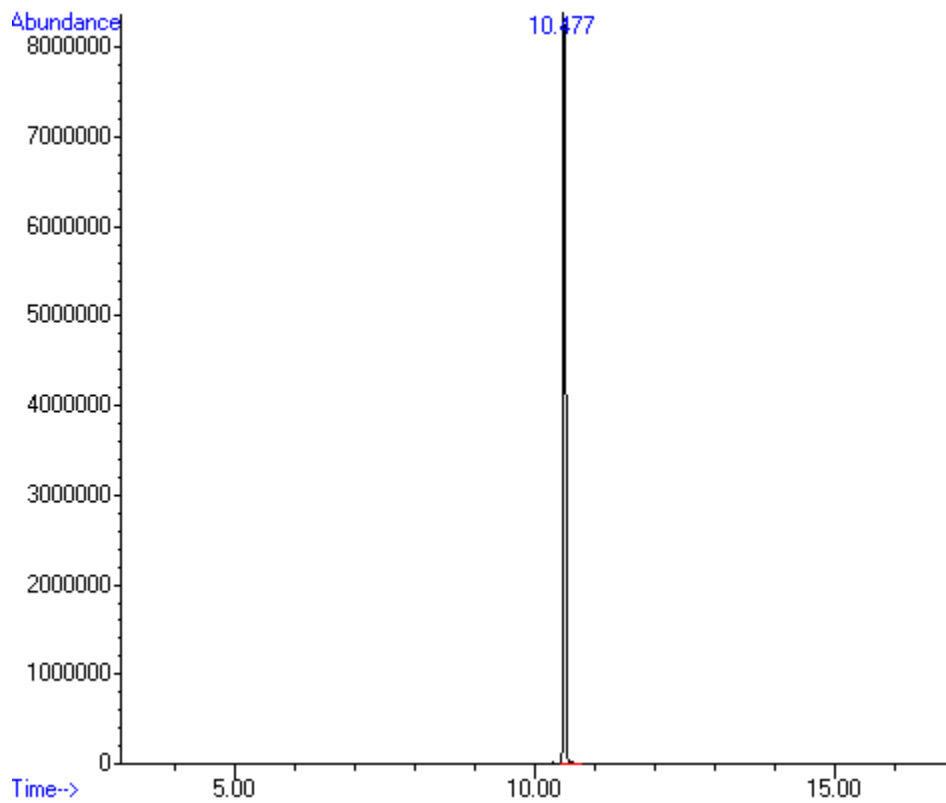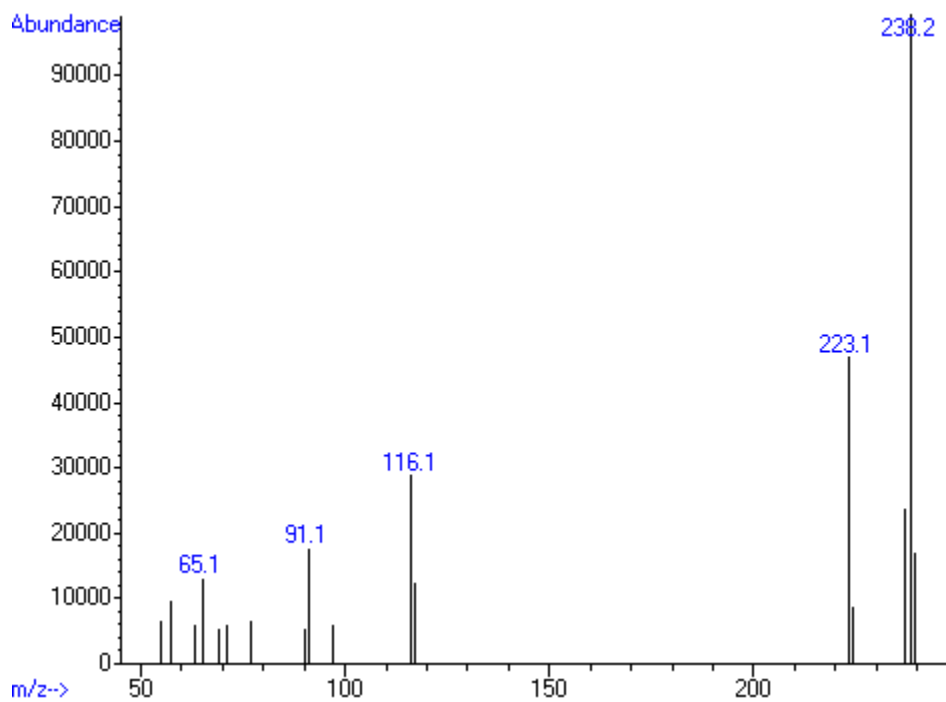

**Figure S51.** GC-MS of (2-MeC<sub>6</sub>H<sub>4</sub>)N=C=N(4-OMe<sub>3</sub>C<sub>6</sub>H<sub>4</sub>).

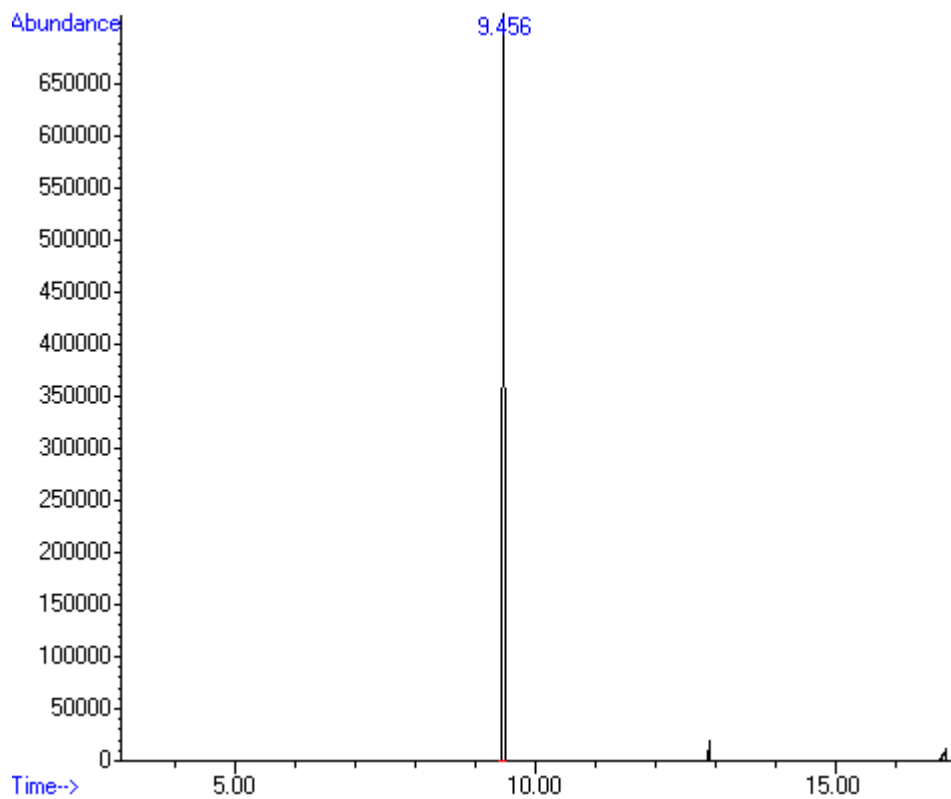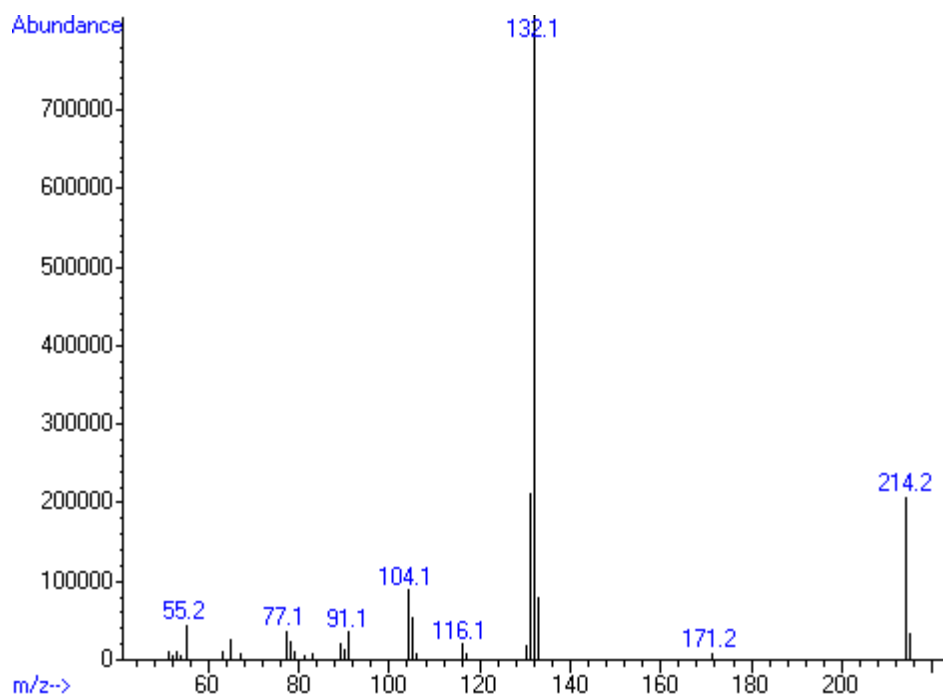

**Figure S52.** GC-MS of (2-MeC<sub>6</sub>H<sub>4</sub>)N=C=NCy.

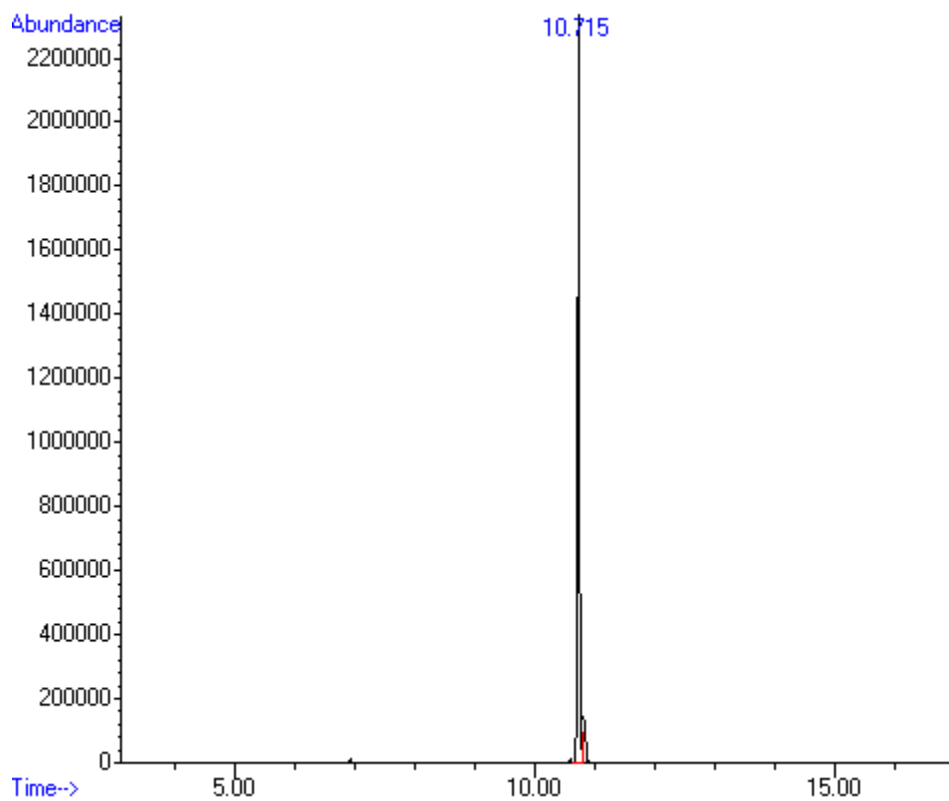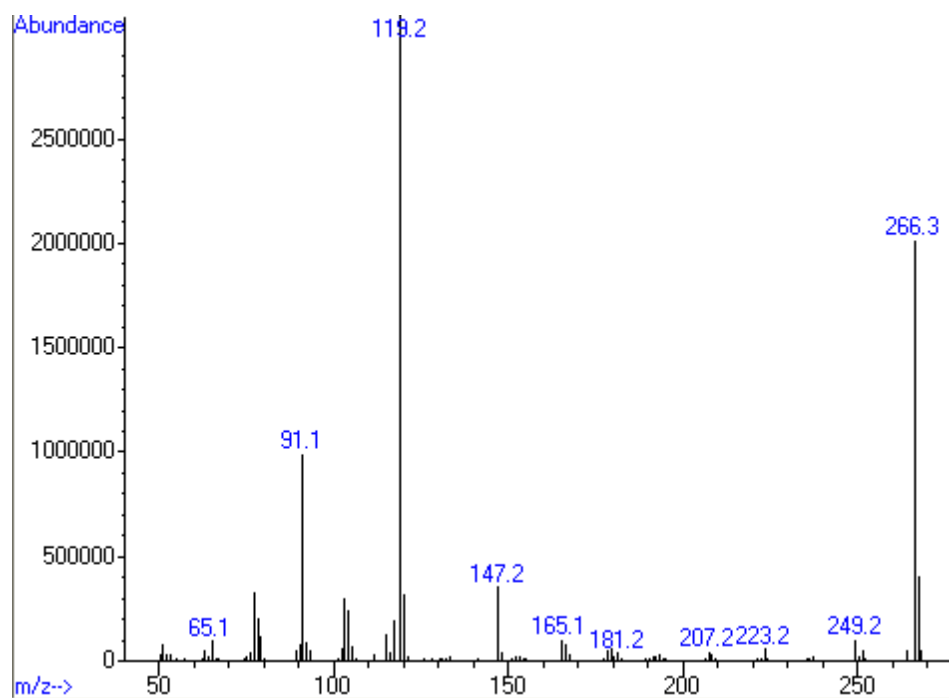

**Figure S53.** GC-MS of (2-MeC<sub>6</sub>H<sub>4</sub>)N=C=NAd.

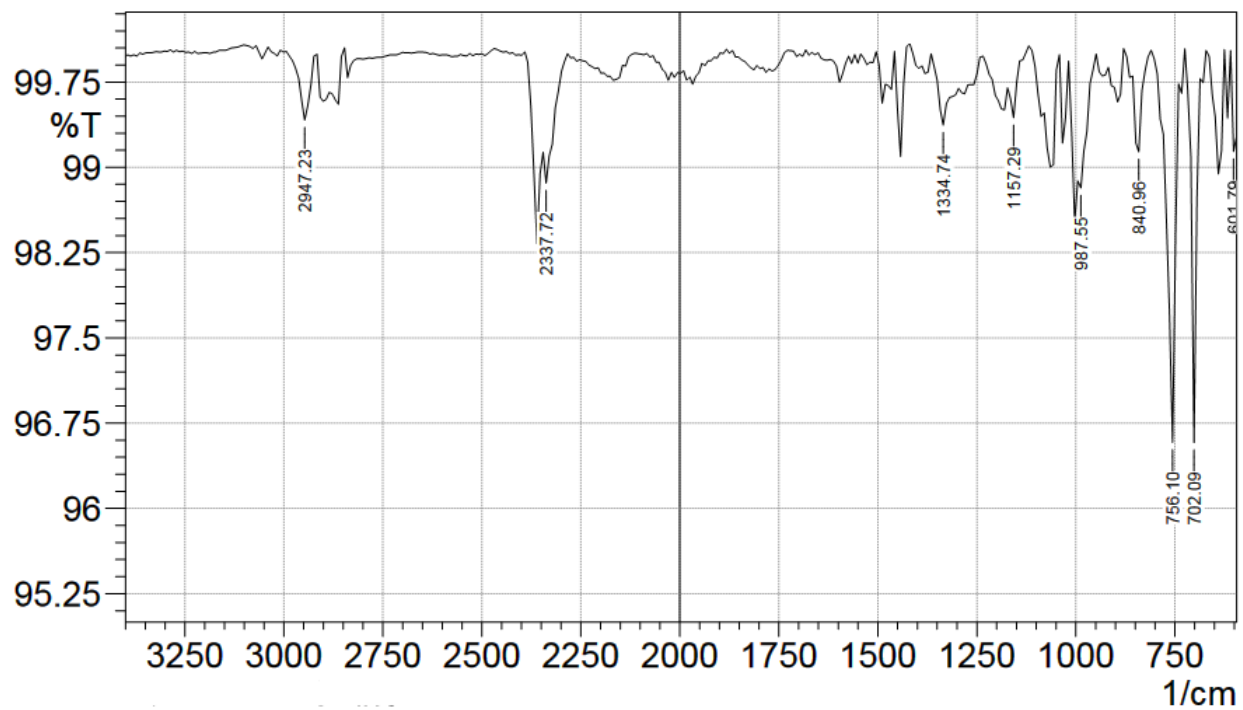

**Figure S54.** IR spectra of  $\text{Cr}_2([\text{OO}]^{\text{Ph}})_2$



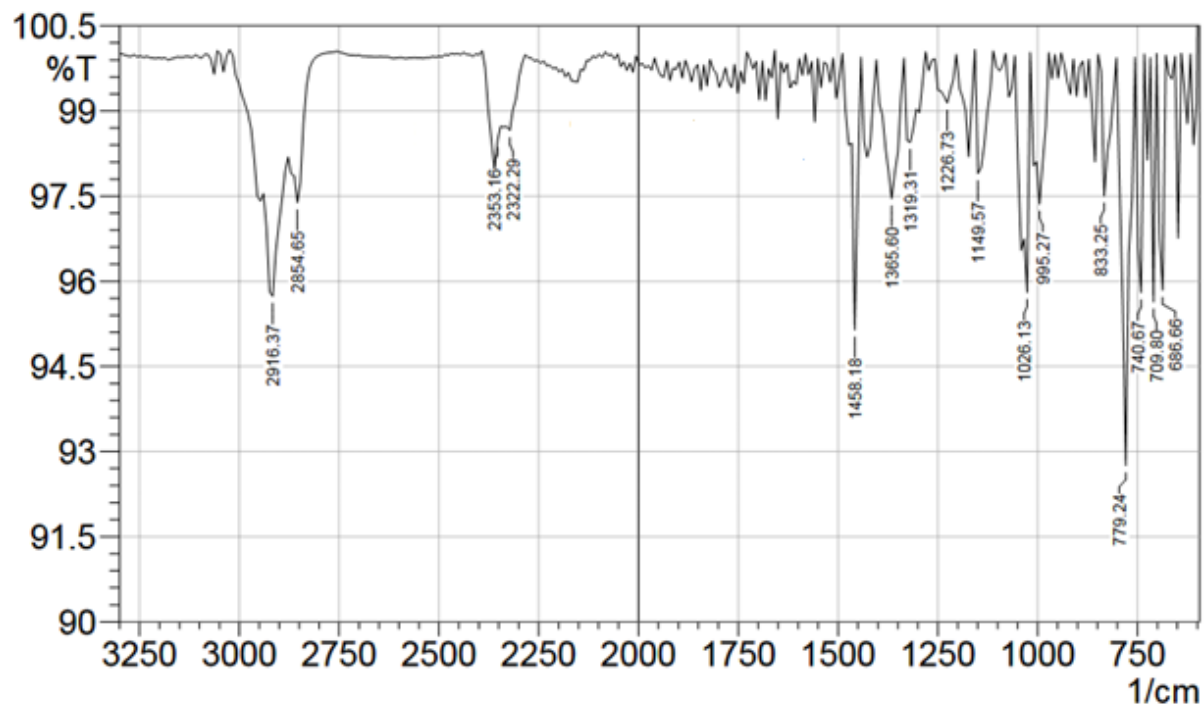

**Figure S55.** IR spectra of  $\text{Cr}[\text{OO}]^{\text{Ph}}(\text{THF})_2$

## 6. Computational data

Cartesian coordinates of all optimized structures are provided in the accompanying xyz file.

**Table S1.** Comparison of metal-ligand bond lengths (Å) in the optimized structures of **1** vs. the crystallographically determined parameters. O1/O2 correspond to the alkoxide arms, O3/O4 to the THFs, and C1/C2 to the bridging phenyl group (see Figure 1 in paper).

|                      | Cr-O1 | Cr-O2 | Cr-O3 | Cr-O4 | Cr-C1 | Cr-C2 |
|----------------------|-------|-------|-------|-------|-------|-------|
| <b>1</b>             | 1.924 | 1.935 | 2.156 | 2.277 | 2.49  |       |
| <b>1<sub>O</sub></b> | 1.915 | 1.928 | 2.203 | 2.281 | 2.475 | 2.525 |
| <b>1<sub>T</sub></b> | 1.858 | 1.857 | 2.586 | 2.230 | 2.116 | 2.127 |
| <b>1<sub>S</sub></b> | 1.885 | 1.889 | 2.364 | 2.120 | 2.173 | 2.183 |

**Table S2.** Comparison of the Mayer bond orders in **1<sub>Q</sub>**, **1<sub>T</sub>**, and quintet Fe[OO]<sup>Ph</sup>(THF)<sub>2</sub>.

|                       | M-O1 | M-O2 | M-O3 | M-O4 | M-C1 | M-C2 |
|-----------------------|------|------|------|------|------|------|
| <b>1<sub>O</sub></b>  | 0.69 | 0.67 | 0.31 | 0.25 | 0.25 | 0.23 |
| <b>1<sub>T</sub></b>  | 0.64 | 0.87 | 0.17 | 0.29 | 0.65 | 0.64 |
| <b>Fe<sub>O</sub></b> | 0.63 | 0.63 | 0.22 | 0.25 | 0.09 | 0.06 |

**Figure S1.** Spin density isosurface (iso = 0.002 au) plots for **1<sub>Q</sub>** (left) and **1<sub>T</sub>** (right). The transparent blue and white surfaces correspond to alpha and beta spin, respectively.

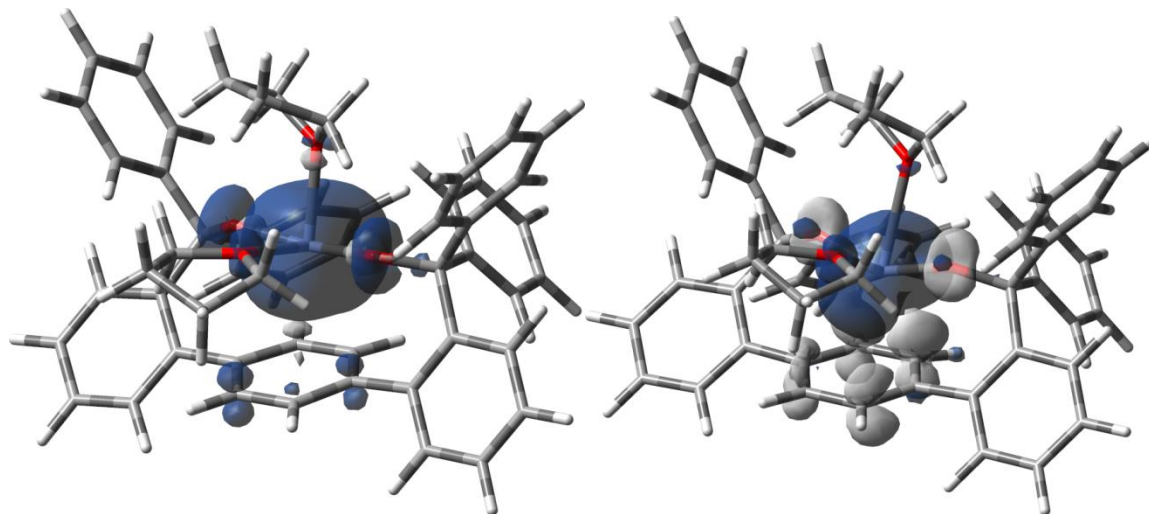

**Table S3.** Comparison of metal-ligand bond lengths (Å) and angles (°) in the optimized structures of **6** vs. the crystallographically determined parameters. See Figure 3 in paper for atom labels.

|                      | Cr-O1 | Cr-O2 | Cr-N1 | Cr-N2 | N1-N3 | N2-N4 | Cr-N1-N3 | Cr-N2-N4 |
|----------------------|-------|-------|-------|-------|-------|-------|----------|----------|
| <b>6</b>             | 1.807 | 1.777 | 1.645 | 1.716 | 1.305 | 1.301 | 159.8    | 131.2    |
| <b>6<sub>Q</sub></b> | 1.774 | 1.757 | 1.861 | 1.923 | 1.220 | 1.231 | 133.6    | 123.3    |
| <b>6<sub>T</sub></b> | 1.760 | 1.751 | 1.683 | 1.815 | 1.239 | 1.231 | 160.8    | 133.8    |
| <b>6<sub>S</sub></b> | 1.776 | 1.773 | 1.640 | 1.699 | 1.273 | 1.277 | 159.7    | 139.3    |

**Table S4.** Summary of thermodynamics of various spin states of **1** and **6**. All energies are listed in hartrees.

|                      | E(SCF)       | H(gas)       | G(gas)       |
|----------------------|--------------|--------------|--------------|
| <b>1<sub>S</sub></b> | -3354.455635 | -3353.563256 | -3353.698116 |
| <b>1<sub>T</sub></b> | -3354.466550 | -3353.574521 | -3353.712175 |
| <b>1<sub>Q</sub></b> | -3354.496495 | -3353.603870 | -3353.743635 |
| <b>6<sub>S</sub></b> | -4110.956897 | -4109.893549 | -4110.059202 |
| <b>6<sub>T</sub></b> | -4110.928821 | -4109.867629 | -4110.034745 |
| <b>6<sub>Q</sub></b> | -4110.897778 | -4109.836275 | -4110.004595 |

**Table S5.** Harmonic frequencies ( $\text{cm}^{-1}$ ) for all optimized species. A small imaginary frequency for **6<sub>T</sub>** was ignored since the singlet was much lower in electronic and free energy.

|                      |          |          |          |           |           |           |
|----------------------|----------|----------|----------|-----------|-----------|-----------|
| <b>1<sub>S</sub></b> |          |          |          | 817.6852  | 822.1459  | 829.1955  |
|                      | 14.5936  | 25.8106  | 28.8729  | 830.6271  | 832.0776  | 834.5851  |
|                      | 33.5653  | 40.1415  | 42.3876  | 846.3516  | 848.7627  | 861.8378  |
|                      | 49.1897  | 52.6772  | 55.6878  | 862.6278  | 873.0425  | 876.9317  |
|                      | 60.5028  | 62.3817  | 63.3694  | 884.9655  | 888.0035  | 894.1181  |
|                      | 66.3415  | 68.1072  | 75.0269  | 898.4446  | 899.8252  | 900.5601  |
|                      | 81.1583  | 86.9660  | 89.9743  | 904.0650  | 908.4834  | 915.4527  |
|                      | 96.8582  | 105.8751 | 110.5301 | 918.1341  | 922.1563  | 928.7000  |
|                      | 111.4030 | 114.8848 | 118.8141 | 932.3131  | 933.6774  | 934.7125  |
|                      | 126.8668 | 127.2522 | 133.3310 | 936.9684  | 945.8053  | 946.2744  |
|                      | 141.1662 | 149.4872 | 173.5217 | 957.7049  | 958.7012  | 960.5254  |
|                      | 176.3917 | 193.0275 | 194.4532 | 970.9700  | 973.7923  | 974.2023  |
|                      | 197.1574 | 207.6308 | 220.0240 | 978.2960  | 979.1889  | 979.7710  |
|                      | 225.2397 | 236.1277 | 243.1269 | 981.4061  | 984.8342  | 986.6856  |
|                      | 247.8920 | 255.7526 | 259.3627 | 988.1170  | 988.2225  | 989.5884  |
|                      | 266.2055 | 269.4169 | 277.7600 | 990.2756  | 1009.3358 | 1015.3475 |
|                      | 287.3274 | 288.7996 | 305.2978 | 1024.7148 | 1025.4233 | 1026.7542 |
|                      | 308.3608 | 321.5534 | 335.2767 | 1027.8978 | 1029.0712 | 1032.4026 |
|                      | 340.3276 | 349.1947 | 357.7086 | 1037.2264 | 1039.6457 | 1042.5718 |
|                      | 388.4205 | 401.6809 | 402.1598 | 1053.1463 | 1055.8291 | 1070.4295 |
|                      | 406.3975 | 412.2624 | 414.4868 | 1071.1241 | 1074.1349 | 1075.5185 |
|                      | 424.0214 | 447.7754 | 451.1894 | 1078.9029 | 1092.5008 | 1096.5483 |
|                      | 470.4136 | 478.0902 | 488.5912 | 1097.7925 | 1119.9711 | 1133.0849 |
|                      | 498.9082 | 510.5587 | 515.0479 | 1133.1832 | 1133.7061 | 1134.8252 |
|                      | 521.5716 | 539.9122 | 546.1618 | 1134.9978 | 1138.8290 | 1140.1610 |
|                      | 556.4998 | 592.4076 | 608.3100 | 1142.3287 | 1145.6342 | 1146.0365 |
|                      | 611.0613 | 613.2546 | 613.4427 | 1152.7827 | 1153.6653 | 1155.2536 |
|                      | 613.6683 | 615.5729 | 625.0754 | 1156.7339 | 1161.1614 | 1167.5514 |
|                      | 628.5097 | 631.1630 | 633.1077 | 1168.0992 | 1169.2866 | 1178.8266 |
|                      | 635.4305 | 635.9578 | 642.9689 | 1179.4727 | 1188.5470 | 1202.7643 |
|                      | 650.7766 | 677.2863 | 683.1504 | 1207.0292 | 1208.4218 | 1216.5017 |
|                      | 694.2369 | 697.5923 | 698.1342 | 1233.5420 | 1235.9934 | 1256.3338 |
|                      | 700.7304 | 703.0156 | 708.7534 | 1256.9790 | 1258.1530 | 1263.6469 |
|                      | 721.9846 | 744.4009 | 745.8401 | 1268.5418 | 1277.3487 | 1278.8848 |
|                      | 748.8309 | 753.6014 | 756.9307 | 1283.5879 | 1284.5946 | 1290.6616 |
|                      | 766.0427 | 774.6765 | 775.9984 | 1291.5287 | 1308.4019 | 1312.7660 |
|                      | 780.0711 | 782.6711 | 800.5670 | 1321.9157 | 1325.5338 | 1332.5754 |

|           |           |           |           |           |           |
|-----------|-----------|-----------|-----------|-----------|-----------|
| 1348.8237 | 1361.3341 | 1366.0231 | 701.4266  | 704.5146  | 708.5285  |
| 1366.5463 | 1368.3442 | 1369.6613 | 723.3309  | 745.3560  | 746.6172  |
| 1386.9333 | 1402.9265 | 1407.0286 | 749.3476  | 753.1868  | 756.8857  |
| 1410.1776 | 1412.0344 | 1419.8130 | 764.8047  | 774.3308  | 775.1932  |
| 1423.9486 | 1425.2536 | 1428.0998 | 782.5277  | 783.8996  | 795.5557  |
| 1429.1637 | 1430.8929 | 1431.8255 | 807.9362  | 813.4113  | 819.5234  |
| 1438.3642 | 1445.4214 | 1447.6954 | 828.8963  | 830.8031  | 831.8286  |
| 1450.2458 | 1465.5728 | 1468.1724 | 835.3316  | 847.8854  | 851.4559  |
| 1469.4770 | 1471.2847 | 1471.3374 | 862.9354  | 864.2895  | 876.3829  |
| 1474.8141 | 1532.5268 | 1540.4775 | 880.6263  | 885.1699  | 889.1273  |
| 1571.5167 | 1574.2784 | 1588.6249 | 892.6923  | 899.3891  | 903.1943  |
| 1589.8090 | 1590.9587 | 1592.1487 | 906.1370  | 911.7868  | 914.9522  |
| 1601.4133 | 1602.5173 | 1605.4387 | 919.5750  | 922.6854  | 928.2730  |
| 1605.7994 | 1608.7392 | 1609.2210 | 932.7923  | 933.6576  | 935.7257  |
| 2926.1939 | 2932.6534 | 2949.9688 | 938.9336  | 947.1136  | 947.5429  |
| 2974.5227 | 2988.5948 | 2992.5647 | 957.9837  | 959.3830  | 960.5953  |
| 2996.1173 | 3002.8671 | 3041.9059 | 972.3325  | 975.3375  | 975.7949  |
| 3042.5399 | 3051.4454 | 3058.3431 | 978.9354  | 979.6731  | 979.8653  |
| 3066.1404 | 3078.9555 | 3090.3428 | 981.0791  | 983.8644  | 985.5326  |
| 3091.5109 | 3091.7304 | 3092.7564 | 987.2834  | 988.3260  | 988.8088  |
| 3092.9624 | 3095.4713 | 3096.6135 | 994.1627  | 1005.9629 | 1014.2536 |
| 3097.5613 | 3097.7389 | 3100.3986 | 1014.4959 | 1025.0812 | 1026.1409 |
| 3100.6220 | 3101.7282 | 3104.7714 | 1027.0677 | 1028.2960 | 1029.3484 |
| 3106.7594 | 3107.8752 | 3109.8071 | 1030.9675 | 1043.1548 | 1051.7475 |
| 3110.9243 | 3111.5037 | 3112.3392 | 1053.8232 | 1054.8245 | 1060.3816 |
| 3113.7943 | 3114.3376 | 3114.9726 | 1071.7778 | 1072.0541 | 1075.2214 |
| 3115.2209 | 3115.8830 | 3121.3566 | 1079.0912 | 1093.8478 | 1094.9529 |
| 3122.0592 | 3122.5410 | 3123.2043 | 1095.9030 | 1122.0728 | 1131.8949 |
| 3124.6474 | 3124.6851 | 3126.4231 | 1133.6877 | 1133.8274 | 1134.1005 |
| 3126.9047 | 3134.6995 | 3140.1314 | 1135.5108 | 1139.0245 | 1140.1299 |

1<sub>r</sub>

|          |          |          |           |           |           |
|----------|----------|----------|-----------|-----------|-----------|
| 12.7876  | 26.2922  | 28.6776  | 1153.8609 | 1155.2886 | 1156.5912 |
| 32.8261  | 37.2695  | 40.8532  | 1157.0094 | 1164.3304 | 1167.5246 |
| 47.6778  | 49.8562  | 53.3450  | 1168.2019 | 1169.9010 | 1182.2675 |
| 54.6023  | 58.2924  | 62.0327  | 1183.7242 | 1191.5279 | 1204.0869 |
| 65.1614  | 68.8583  | 70.4249  | 1207.1235 | 1210.7141 | 1216.6717 |
| 71.8542  | 81.0753  | 85.3881  | 1229.5792 | 1235.3489 | 1253.7663 |
| 87.5095  | 90.1547  | 101.5207 | 1256.5083 | 1257.4462 | 1261.7907 |
| 105.0568 | 111.1861 | 113.0783 | 1267.0901 | 1272.9715 | 1280.7703 |
| 119.8340 | 125.3328 | 132.6920 | 1284.6418 | 1285.5630 | 1290.7845 |
| 133.1736 | 140.2012 | 164.0306 | 1294.1318 | 1307.6965 | 1312.4095 |
| 170.4789 | 178.6131 | 184.5164 | 1319.4154 | 1330.2667 | 1335.2434 |
| 195.0521 | 199.2548 | 213.7389 | 1347.7158 | 1360.8967 | 1366.1048 |
| 219.8351 | 234.1030 | 243.6921 | 1366.8614 | 1368.6180 | 1369.9209 |
| 248.1536 | 256.3082 | 259.9747 | 1378.9254 | 1397.4448 | 1402.4301 |
| 268.3845 | 270.4273 | 277.1217 | 1407.2857 | 1411.9951 | 1419.8962 |
| 287.2955 | 289.5304 | 307.1808 | 1422.7604 | 1424.7985 | 1428.6880 |
| 311.0159 | 320.3187 | 337.1353 | 1428.8649 | 1429.8173 | 1432.4609 |
| 337.9729 | 348.1719 | 359.8986 | 1433.5346 | 1440.1351 | 1443.0350 |
| 385.3737 | 401.3616 | 401.9525 | 1451.2445 | 1460.5050 | 1466.2235 |
| 405.6106 | 407.3822 | 411.8702 | 1471.0380 | 1472.0244 | 1472.0770 |
| 413.5124 | 445.0772 | 453.9612 | 1476.9787 | 1532.4623 | 1538.2071 |
| 465.8269 | 488.6455 | 490.2656 | 1571.9648 | 1574.9338 | 1589.5762 |
| 507.1635 | 512.8919 | 514.4903 | 1590.4434 | 1591.4490 | 1592.8797 |
| 521.7821 | 541.4210 | 544.5427 | 1602.0444 | 1603.2415 | 1606.2595 |
| 557.4415 | 606.4906 | 609.4157 | 1606.7156 | 1609.4631 | 1610.1153 |
| 611.8232 | 613.2321 | 613.4183 | 2908.3291 | 2920.3648 | 2936.7927 |
| 613.6381 | 616.0037 | 618.3054 | 2975.9319 | 2983.6240 | 2988.8897 |
| 631.8840 | 633.6010 | 636.2501 | 2992.4381 | 3004.8046 | 3039.8719 |
| 636.6639 | 636.9220 | 649.2012 | 3043.0659 | 3047.8784 | 3053.1473 |
| 654.0063 | 671.7220 | 685.5759 | 3061.7467 | 3063.4505 | 3089.7811 |
| 691.1151 | 697.6844 | 698.3258 | 3092.7118 | 3093.5442 | 3094.3703 |
|          |          |          | 3096.5487 | 3096.7352 | 3096.9707 |

|           |           |           |           |           |           |
|-----------|-----------|-----------|-----------|-----------|-----------|
| 3097.4543 | 3099.2039 | 3099.7015 | 1024.4510 | 1024.8932 | 1025.9747 |
| 3101.9825 | 3102.7646 | 3104.7429 | 1027.5417 | 1027.7657 | 1033.0030 |
| 3105.8958 | 3107.5883 | 3109.4243 | 1045.8538 | 1048.5737 | 1051.0724 |
| 3110.5047 | 3112.4191 | 3113.8767 | 1061.2303 | 1064.4124 | 1069.8731 |
| 3115.3170 | 3115.5338 | 3115.8654 | 1070.5108 | 1082.9095 | 1087.0152 |
| 3117.4645 | 3118.1289 | 3121.6598 | 1093.0979 | 1097.2819 | 1098.7301 |
| 3123.0400 | 3123.1095 | 3124.7208 | 1105.3228 | 1121.6027 | 1131.9137 |
| 3126.4571 | 3127.6446 | 3128.1974 | 1132.4141 | 1132.9639 | 1134.4940 |
| 3129.1741 | 3134.7858 | 3145.0586 | 1138.4998 | 1139.9667 | 1142.7122 |

1<sub>o</sub>

|          |          |          |           |           |           |
|----------|----------|----------|-----------|-----------|-----------|
| 11.6436  | 21.7555  | 25.9547  | 1145.2017 | 1145.9861 | 1151.7425 |
| 30.4243  | 38.4028  | 40.9800  | 1153.3287 | 1156.1844 | 1156.8049 |
| 48.5456  | 51.0127  | 54.0321  | 1158.0607 | 1160.5450 | 1166.1824 |
| 56.8126  | 58.5096  | 60.2310  | 1168.5591 | 1171.7968 | 1176.5175 |
| 62.9392  | 67.5573  | 70.5211  | 1184.2976 | 1186.7018 | 1201.6477 |
| 72.0687  | 80.1781  | 83.0973  | 1207.3687 | 1210.3456 | 1219.6302 |
| 88.9923  | 91.0672  | 98.9614  | 1238.1674 | 1238.6070 | 1255.3384 |
| 103.8856 | 106.2883 | 113.9778 | 1260.6357 | 1262.8914 | 1267.0592 |
| 115.6319 | 119.9013 | 124.3162 | 1274.5191 | 1277.3044 | 1281.3337 |
| 129.9282 | 135.3001 | 156.7249 | 1281.9622 | 1283.9481 | 1288.4978 |
| 163.6917 | 168.9815 | 176.8450 | 1289.2058 | 1309.1781 | 1311.9345 |
| 193.4803 | 194.7427 | 200.2840 | 1322.3376 | 1328.8804 | 1334.4511 |
| 214.2202 | 216.8359 | 227.1210 | 1348.2649 | 1354.3307 | 1365.8120 |
| 230.0322 | 240.5802 | 251.7638 | 1366.3746 | 1368.3687 | 1369.5728 |
| 253.2266 | 265.3786 | 267.1901 | 1396.8127 | 1398.7173 | 1406.5732 |
| 276.4463 | 280.0092 | 287.6509 | 1408.4413 | 1417.4259 | 1421.5063 |
| 295.5963 | 310.1693 | 321.0985 | 1424.2060 | 1425.0481 | 1427.3412 |
| 334.0975 | 341.7868 | 348.5165 | 1428.4689 | 1430.5225 | 1431.1315 |
| 380.2531 | 400.8710 | 401.4216 | 1443.3818 | 1447.0139 | 1456.1459 |
| 404.4276 | 407.6659 | 408.6925 | 1456.6559 | 1467.4123 | 1468.8331 |
| 410.2677 | 420.0943 | 433.3789 | 1470.2166 | 1470.3878 | 1474.4462 |
| 464.6022 | 470.8789 | 485.7366 | 1497.0927 | 1540.8387 | 1573.6277 |
| 498.3745 | 509.4085 | 516.5963 | 1576.8282 | 1587.7816 | 1589.0223 |
| 521.6929 | 537.1452 | 548.1196 | 1590.3121 | 1591.3572 | 1593.2476 |
| 558.8569 | 583.2271 | 611.3088 | 1602.6037 | 1603.5208 | 1604.7524 |
| 612.5359 | 613.0472 | 613.2892 | 1605.0696 | 1608.0367 | 1608.4798 |
| 613.5392 | 621.9413 | 623.1900 | 2921.7737 | 2939.4066 | 2945.9647 |
| 628.3891 | 629.8295 | 633.4819 | 2974.0853 | 2985.9741 | 2987.9083 |
| 635.2621 | 636.4671 | 641.4997 | 2997.6335 | 3006.1748 | 3035.2998 |
| 649.5521 | 672.2102 | 681.6748 | 3043.7046 | 3049.4322 | 3050.6333 |
| 696.9917 | 698.3101 | 700.4771 | 3064.2016 | 3064.5875 | 3084.4105 |
| 702.1014 | 707.2125 | 717.9763 | 3090.4096 | 3090.5446 | 3091.2474 |
| 722.0490 | 745.2206 | 747.1109 | 3093.3257 | 3094.9350 | 3095.3033 |
| 749.8701 | 755.5790 | 759.0742 | 3096.5223 | 3099.0952 | 3099.3561 |
| 769.2088 | 775.2478 | 776.1884 | 3100.1614 | 3100.2205 | 3102.0277 |
| 780.0397 | 782.7582 | 815.4127 | 3102.5903 | 3104.9688 | 3110.9849 |
| 826.1514 | 828.6329 | 829.2029 | 3111.1387 | 3112.7177 | 3112.9981 |
| 830.3448 | 831.6168 | 833.0362 | 3113.2651 | 3114.1044 | 3114.2635 |
| 841.9509 | 851.2274 | 863.1855 | 3115.5761 | 3120.7711 | 3120.9332 |
| 864.2547 | 878.1926 | 881.2900 | 3121.7669 | 3122.5495 | 3122.7851 |
| 885.4793 | 889.8546 | 893.2482 | 3124.4943 | 3125.5597 | 3125.9056 |
| 898.0781 | 900.8383 | 905.0546 | 3129.1427 | 3133.5462 | 3138.0641 |

6<sub>s</sub>

|          |          |          |
|----------|----------|----------|
| 9.7493   | 11.2998  | 18.4475  |
| 20.3269  | 26.8579  | 35.8122  |
| 37.2225  | 42.7129  | 44.4685  |
| 45.4915  | 52.6229  | 54.1554  |
| 56.3321  | 57.9656  | 61.7054  |
| 63.5838  | 67.3342  | 68.0924  |
| 72.4341  | 77.5574  | 79.1967  |
| 80.4246  | 84.2222  | 91.8352  |
| 92.8450  | 96.1850  | 101.2747 |
| 102.0164 | 106.9225 | 109.7931 |

|           |           |           |                      |           |           |
|-----------|-----------|-----------|----------------------|-----------|-----------|
| 112.0087  | 114.6513  | 117.6444  | 1073.3491            | 1073.6671 | 1074.4253 |
| 122.4730  | 125.6221  | 129.2936  | 1074.6926            | 1077.6669 | 1084.2679 |
| 153.5104  | 172.6334  | 184.4189  | 1088.8359            | 1095.6266 | 1099.0706 |
| 190.5154  | 202.9676  | 214.9521  | 1132.4563            | 1132.9554 | 1133.0328 |
| 219.9736  | 222.1749  | 230.8784  | 1134.0509            | 1134.7251 | 1135.5975 |
| 233.1584  | 236.3481  | 239.0911  | 1135.9876            | 1136.3530 | 1136.7161 |
| 241.7623  | 248.8984  | 260.6667  | 1137.4731            | 1139.2525 | 1144.3364 |
| 269.9721  | 276.3957  | 282.7928  | 1144.9899            | 1148.5160 | 1152.1472 |
| 287.7701  | 289.7078  | 292.4501  | 1154.0233            | 1154.6102 | 1155.5800 |
| 295.1034  | 301.0715  | 314.9078  | 1156.8064            | 1160.5514 | 1162.0258 |
| 319.7757  | 326.8744  | 337.2481  | 1162.8453            | 1163.2802 | 1176.6526 |
| 342.0772  | 346.1080  | 357.0744  | 1179.0277            | 1185.0889 | 1188.8295 |
| 377.8605  | 391.7895  | 398.7623  | 1238.6137            | 1241.5376 | 1259.1927 |
| 399.0659  | 404.1035  | 405.9690  | 1270.7839            | 1271.5453 | 1274.9965 |
| 408.8402  | 409.4676  | 410.6105  | 1275.4238            | 1281.6208 | 1281.8344 |
| 415.5492  | 417.5359  | 418.5175  | 1283.7576            | 1284.8962 | 1288.3154 |
| 426.1806  | 428.8745  | 437.7335  | 1290.4031            | 1301.2576 | 1322.4159 |
| 441.1233  | 466.8384  | 476.6807  | 1328.2981            | 1338.9614 | 1342.2368 |
| 482.7992  | 489.3595  | 503.3533  | 1349.7944            | 1362.2411 | 1363.7358 |
| 508.1758  | 510.0593  | 521.8210  | 1366.7740            | 1367.5263 | 1368.7694 |
| 528.2248  | 533.3138  | 542.0796  | 1369.7041            | 1369.9363 | 1375.8512 |
| 552.4196  | 557.2745  | 577.9445  | 1395.4059            | 1403.1453 | 1418.5548 |
| 587.4632  | 607.6069  | 607.8783  | 1426.5190            | 1427.5657 | 1429.3738 |
| 611.1763  | 611.8655  | 612.6074  | 1430.0098            | 1430.2850 | 1430.8135 |
| 613.6569  | 613.7840  | 614.4407  | 1431.9902            | 1433.6540 | 1440.7378 |
| 616.3585  | 618.9214  | 626.9610  | 1455.9449            | 1469.7226 | 1471.4172 |
| 630.5368  | 632.1736  | 633.5163  | 1471.8129            | 1472.0986 | 1472.3584 |
| 635.2728  | 637.3323  | 643.2134  | 1474.7743            | 1475.0932 | 1476.2243 |
| 648.2894  | 661.1527  | 667.8815  | 1478.0583            | 1487.5415 | 1503.2455 |
| 687.8198  | 688.4066  | 694.6930  | 1514.1482            | 1552.4828 | 1572.0036 |
| 696.8223  | 696.9807  | 700.4857  | 1576.6661            | 1577.3283 | 1578.0972 |
| 701.4990  | 705.1452  | 706.4759  | 1582.6517            | 1583.2746 | 1588.7601 |
| 712.9296  | 719.3140  | 724.0094  | 1589.8095            | 1592.3033 | 1592.6621 |
| 729.1709  | 735.0937  | 737.5196  | 1603.2354            | 1604.7992 | 1605.3599 |
| 747.0920  | 749.0790  | 752.4630  | 1606.1552            | 1606.6896 | 1607.1434 |
| 755.2810  | 757.1223  | 760.9203  | 1610.1807            | 1610.5936 | 1610.8905 |
| 767.0446  | 768.5495  | 774.9993  | 1612.2149            | 1613.3901 | 3095.2656 |
| 779.1281  | 779.8242  | 789.5336  | 3095.3568            | 3095.6745 | 3095.8341 |
| 809.8192  | 813.2111  | 814.7311  | 3096.7183            | 3097.2719 | 3097.4256 |
| 826.9743  | 827.2679  | 829.9438  | 3097.9537            | 3099.8941 | 3100.3375 |
| 831.2920  | 834.9145  | 835.0415  | 3100.4520            | 3102.8509 | 3104.1033 |
| 835.8884  | 842.7519  | 843.4932  | 3105.1576            | 3108.5352 | 3109.3883 |
| 863.3489  | 866.9145  | 887.7488  | 3109.4459            | 3109.7577 | 3109.9139 |
| 893.6967  | 900.6789  | 905.0151  | 3111.3643            | 3111.5859 | 3113.2012 |
| 908.0675  | 911.3707  | 912.2137  | 3113.2567            | 3115.0725 | 3115.3237 |
| 916.6176  | 920.2266  | 925.0801  | 3115.6006            | 3117.3536 | 3118.8051 |
| 929.7132  | 932.9275  | 934.0691  | 3119.2857            | 3119.5172 | 3119.9529 |
| 942.5847  | 943.4971  | 946.3853  | 3121.5241            | 3121.6990 | 3122.6231 |
| 949.5102  | 954.5177  | 957.9776  | 3122.9058            | 3123.9017 | 3124.5417 |
| 961.0445  | 962.1255  | 963.6309  | 3126.0827            | 3126.3107 | 3126.9178 |
| 964.9592  | 968.4837  | 968.9259  | 3128.0032            | 3128.0896 | 3130.1136 |
| 970.2911  | 974.3381  | 975.8856  | 3131.7471            | 3132.3135 | 3134.0898 |
| 976.6272  | 981.3281  | 982.2621  | 3135.6313            | 3137.6189 | 3138.1817 |
| 983.4230  | 985.1669  | 985.4170  | 3142.2156            | 3145.7576 | 3162.0238 |
| 985.6472  | 985.9846  | 986.5847  |                      |           |           |
| 986.6966  | 987.2512  | 987.9833  |                      |           |           |
| 988.3136  | 988.8712  | 989.3598  | <b>6<sub>T</sub></b> |           |           |
| 990.8375  | 993.9235  | 1003.7851 | -1.2730              | 7.2271    | 17.5145   |
| 1021.6601 | 1022.2212 | 1022.6777 | 19.2022              | 25.0209   | 26.5368   |
| 1024.0418 | 1026.2069 | 1026.7316 | 28.8120              | 36.2977   | 36.7590   |
| 1027.2984 | 1028.1899 | 1029.8960 | 42.0707              | 44.2150   | 46.5872   |
| 1032.6860 | 1043.4078 | 1051.7771 | 49.6846              | 52.3688   | 55.4895   |
| 1056.9460 | 1068.2013 | 1071.8992 | 58.2038              | 61.0829   | 69.6661   |
|           |           |           | 70.3231              | 72.5249   | 73.2819   |

|           |           |           |                |           |           |
|-----------|-----------|-----------|----------------|-----------|-----------|
| 77.2012   | 78.6115   | 81.5821   | 1026.5427      | 1028.9748 | 1030.0499 |
| 87.0582   | 91.3393   | 99.0724   | 1030.1987      | 1044.8868 | 1046.9738 |
| 101.3209  | 102.3066  | 106.1324  | 1058.8668      | 1071.8536 | 1072.3326 |
| 111.1208  | 113.7269  | 115.5955  | 1073.4995      | 1074.2352 | 1074.8012 |
| 118.2493  | 121.1908  | 129.0019  | 1075.7075      | 1077.7471 | 1079.9309 |
| 151.2173  | 158.5077  | 183.2729  | 1091.0876      | 1097.0719 | 1097.9876 |
| 188.7187  | 197.1650  | 208.9019  | 1128.1720      | 1132.1826 | 1134.0029 |
| 212.3359  | 216.5995  | 220.0501  | 1134.6757      | 1135.5843 | 1136.2502 |
| 222.8373  | 226.5000  | 236.3187  | 1136.5224      | 1136.5824 | 1137.8233 |
| 237.7054  | 244.9900  | 251.0197  | 1137.9502      | 1138.9074 | 1140.5237 |
| 261.6872  | 263.0614  | 271.7340  | 1146.6502      | 1147.1819 | 1154.0266 |
| 287.0035  | 288.5321  | 293.8506  | 1154.7037      | 1156.7001 | 1156.8654 |
| 295.2275  | 301.2036  | 302.2861  | 1157.4342      | 1159.6825 | 1160.5231 |
| 311.1179  | 319.5920  | 323.4996  | 1163.4920      | 1166.3552 | 1176.6255 |
| 330.7957  | 345.1427  | 348.5862  | 1187.8383      | 1194.2750 | 1196.6546 |
| 363.3172  | 379.4729  | 392.6772  | 1238.5214      | 1241.0460 | 1258.5265 |
| 399.6890  | 401.1538  | 403.2831  | 1269.8028      | 1272.6522 | 1273.0606 |
| 404.5853  | 408.4883  | 410.4063  | 1275.5555      | 1280.1255 | 1280.6968 |
| 411.6494  | 412.2668  | 413.1503  | 1283.3404      | 1284.4176 | 1289.3168 |
| 414.5472  | 420.0157  | 425.4185  | 1289.5545      | 1303.0176 | 1316.2071 |
| 431.3581  | 446.5673  | 456.8771  | 1327.1579      | 1336.5176 | 1341.7288 |
| 468.6799  | 476.3949  | 488.2988  | 1345.8150      | 1346.3145 | 1360.8831 |
| 496.4377  | 507.7663  | 515.2180  | 1361.2922      | 1368.3638 | 1368.9946 |
| 519.0768  | 527.3585  | 534.1063  | 1371.3143      | 1372.3024 | 1375.4643 |
| 541.3887  | 548.7837  | 553.1985  | 1375.9405      | 1395.8500 | 1420.3091 |
| 576.5115  | 581.7678  | 594.0986  | 1426.5822      | 1428.8508 | 1430.3834 |
| 597.6789  | 605.4958  | 612.1612  | 1430.7562      | 1430.9074 | 1432.9248 |
| 612.5588  | 612.9249  | 613.5638  | 1434.0184      | 1440.4785 | 1440.9575 |
| 613.9421  | 614.6454  | 615.6130  | 1457.1599      | 1467.4138 | 1470.4514 |
| 616.1347  | 617.1100  | 625.8429  | 1471.9108      | 1472.0390 | 1473.6820 |
| 630.5220  | 632.7175  | 634.2623  | 1473.8759      | 1474.3204 | 1478.8050 |
| 637.1969  | 638.6808  | 663.5315  | 1480.6563      | 1504.7415 | 1554.6292 |
| 670.2818  | 688.9954  | 690.4313  | 1570.8578      | 1572.3455 | 1573.3144 |
| 695.7783  | 697.6817  | 700.1046  | 1574.6491      | 1575.4076 | 1580.6562 |
| 700.3055  | 701.2083  | 703.5164  | 1583.9094      | 1590.7271 | 1592.1183 |
| 704.5901  | 705.7865  | 713.5083  | 1593.3139      | 1594.1552 | 1599.4763 |
| 727.7556  | 731.9610  | 737.0274  | 1601.1918      | 1603.8456 | 1604.7459 |
| 744.7221  | 748.3457  | 748.9231  | 1607.5131      | 1607.8422 | 1608.6380 |
| 751.7314  | 752.4288  | 756.9983  | 1610.6351      | 1611.4742 | 1614.4378 |
| 760.6107  | 763.4120  | 765.2811  | 1624.1546      | 1690.5988 | 3095.0607 |
| 768.8058  | 769.1279  | 778.4323  | 3095.7531      | 3096.3074 | 3096.5010 |
| 807.6043  | 814.3143  | 816.1235  | 3096.7946      | 3097.0802 | 3097.6356 |
| 820.9393  | 824.8124  | 826.7135  | 3098.9138      | 3099.5449 | 3099.7329 |
| 831.1142  | 833.9773  | 835.5784  | 3101.0052      | 3102.8520 | 3103.6337 |
| 839.1447  | 840.2480  | 842.4801  | 3104.4372      | 3104.5954 | 3105.5452 |
| 865.7795  | 866.8340  | 889.0167  | 3105.5492      | 3105.8707 | 3106.2268 |
| 895.8120  | 897.8336  | 900.2500  | 3107.9327      | 3109.6936 | 3112.4040 |
| 903.8970  | 908.5784  | 910.0197  | 3112.5435      | 3113.1923 | 3113.6618 |
| 911.0270  | 917.9912  | 923.0426  | 3114.0830      | 3115.2680 | 3116.1404 |
| 923.7321  | 930.2817  | 932.8205  | 3116.9635      | 3117.5756 | 3117.8083 |
| 933.8503  | 934.7503  | 945.1704  | 3117.8801      | 3119.7620 | 3120.5150 |
| 945.7128  | 955.9652  | 956.8550  | 3122.4565      | 3122.5829 | 3123.5264 |
| 957.7044  | 960.2649  | 964.6858  | 3123.8149      | 3124.3649 | 3124.9011 |
| 965.5908  | 966.5766  | 967.4244  | 3125.5587      | 3125.8417 | 3126.1973 |
| 968.2485  | 974.5185  | 976.6573  | 3127.1991      | 3127.2687 | 3130.0843 |
| 976.8012  | 977.0555  | 979.2304  | 3130.7162      | 3130.8558 | 3131.2866 |
| 981.2157  | 981.5338  | 982.4488  | 3132.1572      | 3138.8553 | 3148.3564 |
| 982.7716  | 983.8687  | 984.9936  |                |           |           |
| 985.3161  | 986.2453  | 986.9111  |                |           |           |
| 987.1053  | 987.3861  | 989.0623  | 6 <sub>0</sub> |           |           |
| 991.0214  | 993.1147  | 995.8329  | 11.8397        | 16.4028   | 20.4524   |
| 1003.6690 | 1021.6494 | 1023.1671 | 26.5339        | 28.2991   | 31.0861   |
| 1023.4084 | 1024.0105 | 1026.0307 | 37.3762        | 41.9151   | 46.3200   |
|           |           |           | 47.1424        | 49.2966   | 54.2746   |

|          |          |          |           |           |           |
|----------|----------|----------|-----------|-----------|-----------|
| 55.0613  | 57.7388  | 62.8531  | 992.3285  | 1000.4810 | 1003.4498 |
| 64.3752  | 70.2287  | 70.7926  | 1016.5950 | 1022.6952 | 1023.2186 |
| 73.1304  | 77.3214  | 78.4130  | 1024.4759 | 1025.2385 | 1025.6686 |
| 82.0194  | 84.4817  | 89.2520  | 1026.2254 | 1027.0371 | 1028.2944 |
| 91.0279  | 95.0846  | 97.2536  | 1029.7113 | 1042.6258 | 1048.2993 |
| 101.2474 | 103.7346 | 107.9495 | 1050.6414 | 1069.3062 | 1073.6476 |
| 112.0427 | 115.1794 | 118.9000 | 1073.7800 | 1074.7580 | 1075.7524 |
| 121.4609 | 127.6859 | 136.2692 | 1077.1122 | 1078.6130 | 1082.0752 |
| 146.1349 | 148.8867 | 176.2151 | 1088.0769 | 1095.1369 | 1097.5178 |
| 183.6553 | 198.2937 | 202.0934 | 1127.1414 | 1131.3358 | 1133.7891 |
| 207.5204 | 213.6848 | 221.4846 | 1134.3723 | 1134.9080 | 1135.0909 |
| 225.8219 | 230.6075 | 234.9170 | 1136.3053 | 1136.4910 | 1136.7671 |
| 238.7279 | 247.2185 | 253.0533 | 1136.8706 | 1137.8198 | 1138.1643 |
| 258.4376 | 262.0901 | 272.1973 | 1145.7878 | 1148.1234 | 1152.9108 |
| 278.3148 | 282.3818 | 288.7481 | 1153.1828 | 1156.0294 | 1156.4091 |
| 293.7429 | 294.3017 | 298.4449 | 1159.3374 | 1159.7651 | 1162.2151 |
| 310.9918 | 319.2153 | 322.4891 | 1163.1825 | 1167.4192 | 1177.2762 |
| 336.0680 | 342.2461 | 351.9430 | 1181.3074 | 1194.5455 | 1196.8489 |
| 352.1529 | 371.6829 | 378.6685 | 1237.2120 | 1241.1626 | 1260.3650 |
| 386.5576 | 399.1405 | 401.1905 | 1266.3351 | 1269.3828 | 1270.3373 |
| 401.8485 | 404.8074 | 406.4505 | 1275.2858 | 1278.6560 | 1280.4084 |
| 407.8861 | 409.6279 | 410.6946 | 1283.3763 | 1286.0337 | 1286.6876 |
| 415.8969 | 416.2301 | 420.1211 | 1296.4253 | 1303.5404 | 1306.6162 |
| 421.5457 | 426.5808 | 459.4121 | 1326.0530 | 1331.2255 | 1340.2142 |
| 466.8263 | 472.4857 | 479.8704 | 1342.5111 | 1345.8962 | 1360.5234 |
| 486.8760 | 493.7119 | 508.3793 | 1361.4837 | 1366.0050 | 1369.5940 |
| 510.4567 | 514.4971 | 518.0260 | 1370.6592 | 1373.5215 | 1374.5640 |
| 530.7488 | 541.0238 | 546.4411 | 1376.8695 | 1392.6066 | 1420.7699 |
| 552.3285 | 563.2361 | 578.7358 | 1425.8923 | 1427.3586 | 1428.9276 |
| 587.4461 | 590.6064 | 611.5133 | 1430.5904 | 1431.4882 | 1434.0484 |
| 611.9747 | 612.5715 | 612.7332 | 1434.4408 | 1439.5012 | 1441.5510 |
| 612.9514 | 613.7886 | 614.3241 | 1455.9006 | 1468.8884 | 1470.4574 |
| 615.2492 | 616.1645 | 625.5827 | 1472.0127 | 1473.6693 | 1473.7557 |
| 627.4833 | 629.7916 | 631.1278 | 1474.9693 | 1476.2322 | 1479.1438 |
| 633.1560 | 633.7840 | 635.9151 | 1481.6015 | 1505.0670 | 1555.0660 |
| 663.4792 | 667.4493 | 687.2340 | 1571.1726 | 1572.8913 | 1574.8108 |
| 689.1734 | 694.0590 | 695.9993 | 1575.6561 | 1577.5228 | 1581.3416 |
| 698.5548 | 701.0430 | 701.8106 | 1586.8041 | 1592.1317 | 1592.4609 |
| 702.5820 | 708.8747 | 710.7123 | 1593.3082 | 1596.1434 | 1599.7396 |
| 711.3431 | 724.7189 | 730.9448 | 1600.7966 | 1605.2443 | 1605.8757 |
| 736.6134 | 746.2199 | 750.0157 | 1606.8098 | 1607.7909 | 1608.8377 |
| 750.5466 | 752.0586 | 752.8561 | 1610.7815 | 1613.3153 | 1615.5436 |
| 756.0523 | 760.6602 | 764.2721 | 1642.8692 | 1739.8098 | 3086.0132 |
| 765.0228 | 766.6514 | 778.2350 | 3093.9214 | 3094.6627 | 3095.0255 |
| 798.6194 | 812.9210 | 815.6403 | 3095.1044 | 3096.0836 | 3096.3088 |
| 818.8494 | 827.3468 | 828.3724 | 3096.4301 | 3096.7215 | 3097.0457 |
| 829.3453 | 833.8129 | 835.6540 | 3098.2872 | 3101.7201 | 3102.1950 |
| 836.6337 | 839.3110 | 849.1649 | 3102.7926 | 3104.5304 | 3106.0646 |
| 862.7352 | 868.6673 | 884.2258 | 3106.1236 | 3107.2396 | 3108.5970 |
| 893.9764 | 894.3299 | 901.4515 | 3110.1692 | 3110.1940 | 3110.3181 |
| 901.8107 | 904.4554 | 908.1739 | 3110.7802 | 3111.0331 | 3113.4469 |
| 910.6688 | 917.0373 | 922.2696 | 3113.6370 | 3114.3879 | 3117.3554 |
| 925.2809 | 925.3855 | 928.9117 | 3117.4067 | 3117.5245 | 3117.7195 |
| 931.1100 | 933.3974 | 944.7943 | 3118.0381 | 3119.4958 | 3121.3590 |
| 945.1338 | 954.8923 | 956.4182 | 3121.8238 | 3122.5788 | 3122.7110 |
| 956.9944 | 961.1590 | 963.5227 | 3126.2356 | 3126.8445 | 3126.9834 |
| 964.0908 | 964.9400 | 969.6209 | 3127.4629 | 3128.4646 | 3128.6052 |
| 973.2433 | 975.6668 | 976.4555 | 3129.4140 | 3129.9220 | 3130.7807 |
| 977.0591 | 977.9513 | 978.8902 | 3132.4771 | 3135.5043 | 3136.9443 |
| 980.9723 | 981.2632 | 982.4754 | 3137.9984 | 3138.1600 | 3163.8400 |
| 983.5526 | 983.8570 | 985.7884 |           |           |           |
| 986.0046 | 986.6391 | 987.0278 |           |           |           |
| 987.5946 | 988.2461 | 989.9183 |           |           |           |
